# Supplementary material
Source: MDPI journal article supplement (https://www.mdpi.com/2304-6740/9/9/68)

# checkCIF/PLATON report

Structure factors have been supplied for datablock(s) MAB6

THIS REPORT IS FOR GUIDANCE ONLY. IF USED AS PART OF A REVIEW PROCEDURE FOR PUBLICATION, IT SHOULD NOT REPLACE THE EXPERTISE OF AN EXPERIENCED CRYSTALLOGRAPHIC REFEREE.

No syntax errors found.      CIF dictionary      Interpreting this report

## Datablock: MAB6

---

Bond precision:    O- B = 0.0021 A                      Wavelength=0.71075

Cell:                      a=22.3539(4)              b=11.0192(2)              c=22.8834(4)  
                            alpha=90                      beta=107.630(2)              gamma=90  
Temperature:              100 K

|                | Calculated                                             | Reported                                               |
|----------------|--------------------------------------------------------|--------------------------------------------------------|
| Volume         | 5371.95(18)                                            | 5371.94(18)                                            |
| Space group    | C 2/c                                                  | C 1 2/c 1                                              |
| Hall group     | -C 2yc                                                 | -C 2yc                                                 |
| Moiety formula | C12 H32 N4 Ni O2, C12 H28 N4 Ni, 2(B7 H5 O14), 4(H2 O) | C6 H16 N2 Ni0.5 O, C6 H14 N2 Ni0.5, B7 H5 O14, 2(H2 O) |
| Sum formula    | C24 H78 B14 N8 Ni2 O34                                 | C12 H39 B7 N4 Ni O17                                   |
| Mr             | 1291.66                                                | 645.85                                                 |
| Dx, g cm-3     | 1.597                                                  | 1.597                                                  |
| Z              | 4                                                      | 8                                                      |
| Mu (mm-1)      | 0.806                                                  | 0.806                                                  |
| F000           | 2704.0                                                 | 2704.0                                                 |
| F000'          | 2708.23                                                |                                                        |
| h,k,lmax       | 28,14,29                                               | 28,14,29                                               |
| Nref           | 6161                                                   | 6154                                                   |
| Tmin,Tmax      | 0.886,0.930                                            | 0.931,1.000                                            |
| Tmin'          | 0.886                                                  |                                                        |

Correction method= # Reported T Limits: Tmin=0.931 Tmax=1.000  
AbsCorr = MULTI-SCAN

Data completeness= 0.999                      Theta(max)= 27.483

R(reflections)= 0.0384( 5759)              wR2(reflections)= 0.1087( 6154)

S = 1.051                      Npar= 519

---

The following ALERTS were generated. Each ALERT has the format

**test-name\_ALERT\_alert-type\_alert-level.**

Click on the hyperlinks for more details of the test.

### Alert level B

PLAT420\_ALERT\_2\_B D-H Bond Without Acceptor O14 --H14 . Please Check

### Alert level C

|                   |                                                 |       |       |
|-------------------|-------------------------------------------------|-------|-------|
| PLAT223_ALERT_4_C | Solv./Anion Resd 2 H Ueq(max)/Ueq(min) Range    | 4.1   | Ratio |
| PLAT313_ALERT_2_C | Oxygen with Three Covalent Bonds (rare) .....   | 01    | Check |
| PLAT906_ALERT_3_C | Large K Value in the Analysis of Variance ..... | 2.015 | Check |
| PLAT975_ALERT_2_C | Check Calcd Resid. Dens. 0.96A From O23         | 0.45  | eA-3  |
| PLAT976_ALERT_2_C | Check Calcd Resid. Dens. 0.98A From O21         | -0.44 | eA-3  |
| PLAT977_ALERT_2_C | Check Negative Difference Density on H21A       | -0.32 | eA-3  |

### Alert level G

|                   |                                                  |        |        |
|-------------------|--------------------------------------------------|--------|--------|
| PLAT002_ALERT_2_G | Number of Distance or Angle Restraints on AtSite | 32     | Note   |
| PLAT003_ALERT_2_G | Number of Uiso or Uij Restrained non-H Atoms ... | 54     | Report |
| PLAT007_ALERT_5_G | Number of Unrefined Donor-H Atoms .....          | 27     | Report |
| PLAT042_ALERT_1_G | Calc. and Reported Moiety Formula Strings Differ | Please | Check  |
| PLAT045_ALERT_1_G | Calculated and Reported Z Differ by a Factor ... | 0.50   | Check  |
| PLAT083_ALERT_2_G | SHELXL Second Parameter in WGHT Unusually Large  | 14.01  | Why ?  |
| PLAT171_ALERT_4_G | The CIF-Embedded .res File Contains EADP Records | 1      | Report |
| PLAT175_ALERT_4_G | The CIF-Embedded .res File Contains SAME Records | 3      | Report |
| PLAT176_ALERT_4_G | The CIF-Embedded .res File Contains SADI Records | 1      | Report |
| PLAT178_ALERT_4_G | The CIF-Embedded .res File Contains SIMU Records | 5      | Report |
| PLAT187_ALERT_4_G | The CIF-Embedded .res File Contains RIGU Records | 1      | Report |
| PLAT301_ALERT_3_G | Main Residue Disorder .....(Resd 1 )             | 84%    | Note   |
| PLAT302_ALERT_4_G | Anion/Solvent/Minor-Residue Disorder (Resd 2 )   | 94%    | Note   |
| PLAT720_ALERT_4_G | Number of Unusual/Non-Standard Labels .....      | 14     | Note   |
| PLAT793_ALERT_4_G | Model has Chirality at C1 (Centro SPGR)          | S      | Verify |
| PLAT793_ALERT_4_G | Model has Chirality at C2 (Centro SPGR)          | S      | Verify |
| PLAT793_ALERT_4_G | Model has Chirality at C11 (Centro SPGR)         | S      | Verify |
| PLAT793_ALERT_4_G | Model has Chirality at C12 (Centro SPGR)         | S      | Verify |
| PLAT793_ALERT_4_G | Model has Chirality at C1B (Centro SPGR)         | R      | Verify |
| PLAT793_ALERT_4_G | Model has Chirality at C2B (Centro SPGR)         | R      | Verify |
| PLAT793_ALERT_4_G | Model has Chirality at C11B (Centro SPGR)        | R      | Verify |
| PLAT793_ALERT_4_G | Model has Chirality at C12B (Centro SPGR)        | R      | Verify |
| PLAT811_ALERT_5_G | No ADDSYM Analysis: Too Many Excluded Atoms .... | !      | Info   |
| PLAT860_ALERT_3_G | Number of Least-Squares Restraints .....         | 1247   | Note   |
| PLAT910_ALERT_3_G | Missing # of FCF Reflection(s) Below Theta(Min). | 3      | Note   |
| PLAT912_ALERT_4_G | Missing # of FCF Reflections Above STh/L= 0.600  | 3      | Note   |
| PLAT933_ALERT_2_G | Number of OMIT Records in Embedded .res File ... | 1      | Note   |

0 **ALERT level A** = Most likely a serious problem - resolve or explain  
 1 **ALERT level B** = A potentially serious problem, consider carefully  
 6 **ALERT level C** = Check. Ensure it is not caused by an omission or oversight  
 27 **ALERT level G** = General information/check it is not something unexpected

2 **ALERT type 1** CIF construction/syntax error, inconsistent or missing data  
 9 **ALERT type 2** Indicator that the structure model may be wrong or deficient  
 4 **ALERT type 3** Indicator that the structure quality may be low  
 17 **ALERT type 4** Improvement, methodology, query or suggestion  
 2 **ALERT type 5** Informative message, check

It is advisable to attempt to resolve as many as possible of the alerts in all categories. Often the minor alerts point to easily fixed oversights, errors and omissions in your CIF or refinement strategy, so attention to these fine details can be worthwhile. In order to resolve some of the more serious problems it may be necessary to carry out additional measurements or structure refinements. However, the purpose of your study may justify the reported deviations and the more serious of these should normally be commented upon in the discussion or experimental section of a paper or in the "special\_details" fields of the CIF. checkCIF was carefully designed to identify outliers and unusual parameters, but every test has its limitations and alerts that are not important in a particular case may appear. Conversely, the absence of alerts does not guarantee there are no aspects of the results needing attention. It is up to the individual to critically assess their own results and, if necessary, seek expert advice.

### **Publication of your CIF in IUCr journals**

A basic structural check has been run on your CIF. These basic checks will be run on all CIFs submitted for publication in IUCr journals (*Acta Crystallographica*, *Journal of Applied Crystallography*, *Journal of Synchrotron Radiation*); however, if you intend to submit to *Acta Crystallographica Section C* or *E* or *IUCrData*, you should make sure that full publication checks are run on the final version of your CIF prior to submission.

### **Publication of your CIF in other journals**

Please refer to the *Notes for Authors* of the relevant journal for any special instructions relating to CIF submission.

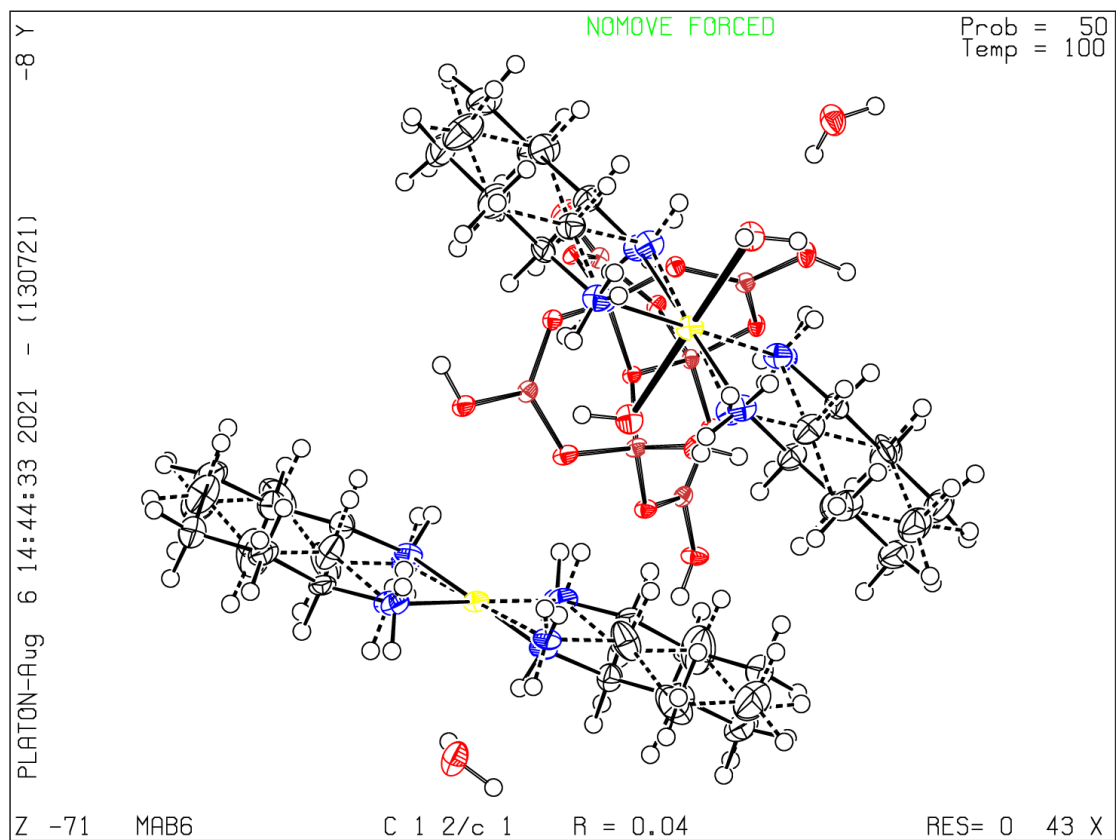

Supplement: s1 [file s1]
