# Supplementary material
Source: MDPI journal article supplement (https://www.mdpi.com/2304-6740/9/9/68)

# checkCIF/PLATON report

Structure factors have been supplied for datablock(s) MAB7

THIS REPORT IS FOR GUIDANCE ONLY. IF USED AS PART OF A REVIEW PROCEDURE FOR PUBLICATION, IT SHOULD NOT REPLACE THE EXPERTISE OF AN EXPERIENCED CRYSTALLOGRAPHIC REFEREE.

No syntax errors found.      CIF dictionary      Interpreting this report

## Datablock: MAB7

---

Bond precision:    O- B = 0.0065 A                      Wavelength=0.71075

Cell:                      a=8.5116(7)                      b=9.7946(5)                      c=9.8073(8)  
                                    alpha=89.873(5)                      beta=82.901(7)                      gamma=74.372(6)  
Temperature:    100 K

|                | Calculated                | Reported                  |
|----------------|---------------------------|---------------------------|
| Volume         | 780.94(10)                | 780.94(10)                |
| Space group    | P -1                      | P -1                      |
| Hall group     | -P 1                      | -P 1                      |
| Moiety formula | C2 H18 B6 N2 Ni O15, H2 O | C2 H18 B6 N2 Ni O15, H2 O |
| Sum formula    | C2 H20 B6 N2 Ni O16       | C2 H20 B6 N2 Ni O16       |
| Mr             | 451.75                    | 451.77                    |
| Dx,g cm-3      | 1.921                     | 1.921                     |
| Z              | 2                         | 2                         |
| Mu (mm-1)      | 1.333                     | 1.333                     |
| F000           | 464.0                     | 464.0                     |
| F000'          | 464.99                    |                           |
| h,k,lmax       | 11,12,12                  | 11,12,12                  |
| Nref           | 3606                      | 5883                      |
| Tmin,Tmax      | 0.953,0.980               | 0.886,1.000               |
| Tmin'          | 0.841                     |                           |

Correction method= # Reported T Limits: Tmin=0.886 Tmax=1.000  
AbsCorr = MULTI-SCAN

Data completeness= 1.631                      Theta(max)= 27.573

R(reflections)= 0.0682( 5320)                      wR2(reflections)= 0.1902( 5883)

S = 1.022                      Npar= 291

---

The following ALERTS were generated. Each ALERT has the format

**test-name\_ALERT\_alert-type\_alert-level.**

Click on the hyperlinks for more details of the test.

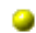

### Alert level C

|                   |                                                  |       |        |
|-------------------|--------------------------------------------------|-------|--------|
| PLAT094_ALERT_2_C | Ratio of Maximum / Minimum Residual Density .... | 2.15  | Report |
| PLAT213_ALERT_2_C | Atom O13 has ADP max/min Ratio .....             | 3.7   | prolat |
| PLAT213_ALERT_2_C | Atom B2 has ADP max/min Ratio .....              | 3.5   | oblate |
| PLAT213_ALERT_2_C | Atom B4 has ADP max/min Ratio .....              | 3.9   | oblate |
| PLAT213_ALERT_2_C | Atom C1 has ADP max/min Ratio .....              | 3.4   | prolat |
| PLAT213_ALERT_2_C | Atom C2 has ADP max/min Ratio .....              | 3.6   | oblate |
| PLAT250_ALERT_2_C | Large U3/U1 Ratio for Average U(i,j) Tensor .... | 2.6   | Note   |
| PLAT313_ALERT_2_C | Oxygen with Three Covalent Bonds (rare) .....    | 01    | Check  |
| PLAT480_ALERT_4_C | Long H...A H-Bond Reported H21B ..05 .           | 2.65  | Ang.   |
| PLAT918_ALERT_3_C | Reflection(s) with I(obs) much Smaller I(calc) . | 27    | Check  |
| PLAT939_ALERT_3_C | Large Value of Not (SHELXL) Weight Optimized S . | 25.84 | Check  |

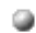

### Alert level G

|                   |                                                  |       |        |
|-------------------|--------------------------------------------------|-------|--------|
| PLAT002_ALERT_2_G | Number of Distance or Angle Restraints on AtSite | 7     | Note   |
| PLAT007_ALERT_5_G | Number of Unrefined Donor-H Atoms .....          | 21    | Report |
| PLAT072_ALERT_2_G | SHELXL First Parameter in WGHT Unusually Large   | 0.13  | Report |
| PLAT172_ALERT_4_G | The CIF-Embedded .res File Contains DFIX Records | 2     | Report |
| PLAT173_ALERT_4_G | The CIF-Embedded .res File Contains DANG Records | 4     | Report |
| PLAT187_ALERT_4_G | The CIF-Embedded .res File Contains RIGU Records | 1     | Report |
| PLAT300_ALERT_4_G | Atom Site Occupancy of H13 Constrained at        | 0.5   | Check  |
| PLAT300_ALERT_4_G | Atom Site Occupancy of H13A Constrained at       | 0.5   | Check  |
| PLAT301_ALERT_3_G | Main Residue Disorder .....(Resd 1 )             | 8%    | Note   |
| PLAT302_ALERT_4_G | Anion/Solvent/Minor-Residue Disorder (Resd 2 )   | 100%  | Note   |
| PLAT302_ALERT_4_G | Anion/Solvent/Minor-Residue Disorder (Resd 3 )   | 100%  | Note   |
| PLAT304_ALERT_4_G | Non-Integer Number of Atoms in ..... (Resd 2 )   | 1.59  | Check  |
| PLAT304_ALERT_4_G | Non-Integer Number of Atoms in ..... (Resd 3 )   | 1.41  | Check  |
| PLAT417_ALERT_2_G | Short Inter D-H..H-D H13A ..H22B .               | 2.13  | Ang.   |
|                   | 1-x,1-y,1-z =                                    | 2_666 | Check  |
| PLAT417_ALERT_2_G | Short Inter D-H..H-D H21A ..H31D .               | 2.10  | Ang.   |
|                   | x,y,z =                                          | 1_555 | Check  |
| PLAT720_ALERT_4_G | Number of Unusual/Non-Standard Labels .....      | 12    | Note   |
| PLAT789_ALERT_4_G | Atoms with Negative _atom_site_disorder_group #  | 1     | Check  |
| PLAT860_ALERT_3_G | Number of Least-Squares Restraints .....         | 277   | Note   |
| PLAT870_ALERT_4_G | ALERTS Related to Twinning Effects Suppressed .. | !     | Info   |
| PLAT910_ALERT_3_G | Missing # of FCF Reflection(s) Below Theta(Min). | 2     | Note   |
| PLAT912_ALERT_4_G | Missing # of FCF Reflections Above STh/L= 0.600  | 44    | Note   |
| PLAT931_ALERT_5_G | CIFcalcFCF Twin Law [ 0 1 0] Est.d BASF          | 0.42  | Check  |
| PLAT933_ALERT_2_G | Number of OMIT Records in Embedded .res File ... | 2     | Note   |
| PLAT941_ALERT_3_G | Average HKL Measurement Multiplicity .....       | 1.7   | Low    |

0 **ALERT level A** = Most likely a serious problem - resolve or explain  
0 **ALERT level B** = A potentially serious problem, consider carefully  
11 **ALERT level C** = Check. Ensure it is not caused by an omission or oversight  
24 **ALERT level G** = General information/check it is not something unexpected

0 **ALERT type 1** CIF construction/syntax error, inconsistent or missing data  
13 **ALERT type 2** Indicator that the structure model may be wrong or deficient  
6 **ALERT type 3** Indicator that the structure quality may be low  
14 **ALERT type 4** Improvement, methodology, query or suggestion  
2 **ALERT type 5** Informative message, check

It is advisable to attempt to resolve as many as possible of the alerts in all categories. Often the minor alerts point to easily fixed oversights, errors and omissions in your CIF or refinement strategy, so attention to these fine details can be worthwhile. In order to resolve some of the more serious problems it may be necessary to carry out additional measurements or structure refinements. However, the purpose of your study may justify the reported deviations and the more serious of these should normally be commented upon in the discussion or experimental section of a paper or in the "special\_details" fields of the CIF. checkCIF was carefully designed to identify outliers and unusual parameters, but every test has its limitations and alerts that are not important in a particular case may appear. Conversely, the absence of alerts does not guarantee there are no aspects of the results needing attention. It is up to the individual to critically assess their own results and, if necessary, seek expert advice.

### **Publication of your CIF in IUCr journals**

A basic structural check has been run on your CIF. These basic checks will be run on all CIFs submitted for publication in IUCr journals (*Acta Crystallographica*, *Journal of Applied Crystallography*, *Journal of Synchrotron Radiation*); however, if you intend to submit to *Acta Crystallographica Section C* or *E* or *IUCrData*, you should make sure that full publication checks are run on the final version of your CIF prior to submission.

### **Publication of your CIF in other journals**

Please refer to the *Notes for Authors* of the relevant journal for any special instructions relating to CIF submission.

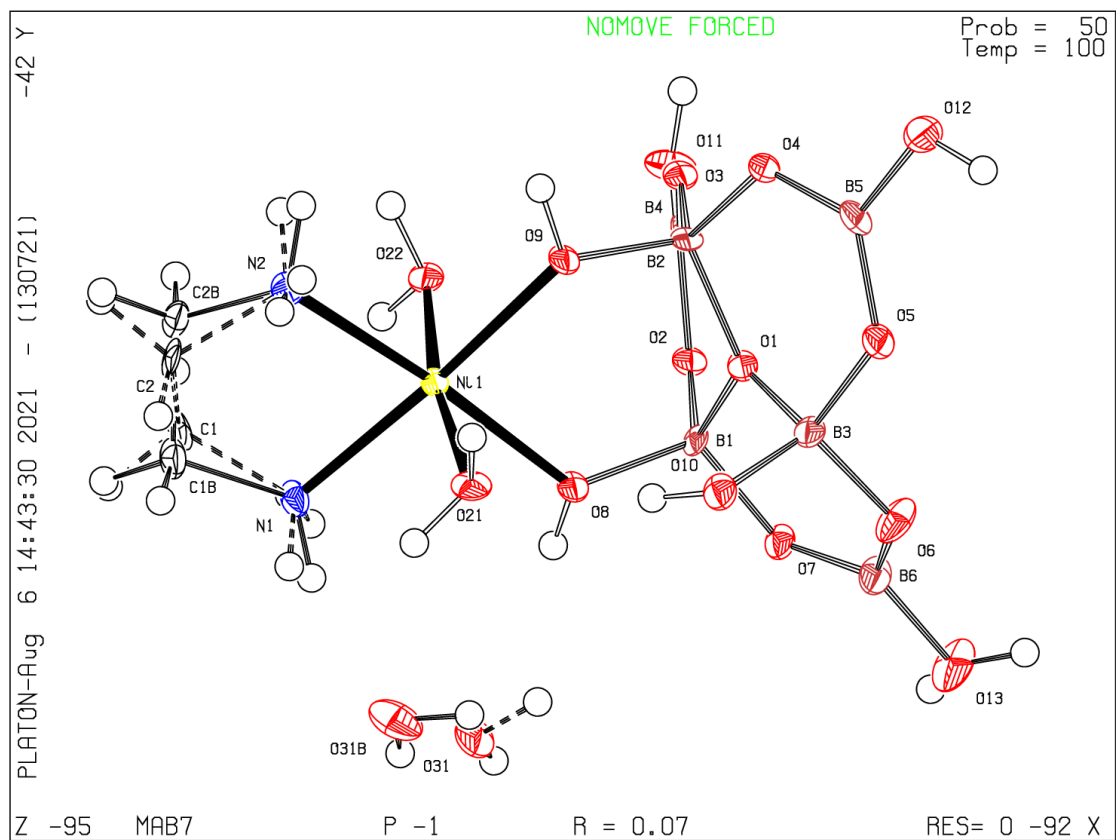

Supplement: s1 [file s1]
