# Supplementary material
Source: MDPI journal article supplement (https://www.mdpi.com/2304-6740/9/9/68)

# checkCIF/PLATON report

Structure factors have been supplied for datablock(s) MAB2

THIS REPORT IS FOR GUIDANCE ONLY. IF USED AS PART OF A REVIEW PROCEDURE FOR PUBLICATION, IT SHOULD NOT REPLACE THE EXPERTISE OF AN EXPERIENCED CRYSTALLOGRAPHIC REFEREE.

No syntax errors found.      CIF dictionary      Interpreting this report

## Datablock: MAB2

---

Bond precision:    O- B = 0.0056 A                      Wavelength=0.68890

Cell:                      a=8.5763(5)                      b=9.2902(6)                      c=9.3493(6)  
                                    alpha=78.098(5)                      beta=89.108(5)                      gamma=89.110(5)  
Temperature:    100 K

|                | Calculated                 | Reported                   |
|----------------|----------------------------|----------------------------|
| Volume         | 728.75(8)                  | 728.75(8)                  |
| Space group    | P -1                       | P -1                       |
| Hall group     | -P 1                       | -P 1                       |
| Moiety formula | C8 H26 N6 Ni, 2(B5 H4 O10) | C8 H26 N6 Ni, 2(B5 H4 O10) |
| Sum formula    | C8 H34 B10 N6 Ni O20       | C8 H34 B10 N6 Ni O20       |
| Mr             | 701.20                     | 701.22                     |
| Dx,g cm-3      | 1.598                      | 1.598                      |
| Z              | 1                          | 1                          |
| Mu (mm-1)      | 0.693                      | 0.699                      |
| F000           | 362.0                      | 362.0                      |
| F000'          | 362.54                     |                            |
| h,k,lmax       | 11,12,12                   | 11,12,12                   |
| Nref           | 3340                       | 3152                       |
| Tmin,Tmax      |                            | 0.275,1.000                |
| Tmin'          |                            |                            |

Correction method= # Reported T Limits: Tmin=0.275 Tmax=1.000  
AbsCorr = MULTI-SCAN

Data completeness= 0.944                      Theta(max)= 26.572

R(reflections)= 0.0767( 2526)                      wR2(reflections)= 0.2109( 3152)

S = 1.077                      Npar= 273

---

The following ALERTS were generated. Each ALERT has the format  
**test-name\_ALERT\_alert-type\_alert-level.**  
Click on the hyperlinks for more details of the test.

---

## Alert level B

PLAT250\_ALERT\_2\_B Large U3/U1 Ratio for Average U(i,j) Tensor .... 5.1 Note

---

## Alert level C

PLAT029\_ALERT\_3\_C \_diffn\_measured\_fraction\_theta\_full value Low . 0.961 Why?  
PLAT213\_ALERT\_2\_C Atom O2 has ADP max/min Ratio ..... 3.6 prolat  
PLAT241\_ALERT\_2\_C High 'MainMol' Ueq as Compared to Neighbors of 02 Check  
PLAT480\_ALERT\_4\_C Long H...A H-Bond Reported H12 ..05 . 2.63 Ang.  
PLAT906\_ALERT\_3\_C Large K Value in the Analysis of Variance ..... 2.770 Check  
PLAT911\_ALERT\_3\_C Missing FCF Refl Between Thmin & STh/L= 0.600 100 Report  
PLAT913\_ALERT\_3\_C Missing # of Very Strong Reflections in FCF .... 5 Note  
PLAT975\_ALERT\_2\_C Check Calcd Resid. Dens. 0.96A From 09 0.41 eA-3

---

## Alert level G

ABSMU01\_ALERT\_1\_G Calculation of \_exptl\_absorpt\_correction\_mu  
not performed for this radiation type.  
PLAT007\_ALERT\_5\_G Number of Unrefined Donor-H Atoms ..... 14 Report  
PLAT072\_ALERT\_2\_G SHELXL First Parameter in WGHT Unusually Large 0.12 Report  
PLAT092\_ALERT\_4\_G Check: Wavelength Given is not Cu,Ga,Mo,Ag,In Ka 0.68890 Ang.  
PLAT154\_ALERT\_1\_G The s.u.'s on the Cell Angles are Equal ..(Note) 0.005 Degree  
PLAT301\_ALERT\_3\_G Main Residue Disorder .....(Resd 1 ) 93% Note  
PLAT811\_ALERT\_5\_G No ADDSYM Analysis: Too Many Excluded Atoms .... ! Info  
PLAT910\_ALERT\_3\_G Missing # of FCF Reflection(s) Below Theta(Min). 3 Note  
PLAT912\_ALERT\_4\_G Missing # of FCF Reflections Above STh/L= 0.600 85 Note  
PLAT933\_ALERT\_2\_G Number of OMIT Records in Embedded .res File ... 2 Note  
PLAT941\_ALERT\_3\_G Average HKL Measurement Multiplicity ..... 2.0 Low  
PLAT984\_ALERT\_1\_G The B-f'= 0.0004 Deviates from the B&C-Value 0.0014 Check  
PLAT984\_ALERT\_1\_G The N-f'= 0.0037 Deviates from the B&C-Value 0.0056 Check  
PLAT984\_ALERT\_1\_G The Ni-f'= 0.2866 Deviates from the B&C-Value 0.3428 Check  
PLAT984\_ALERT\_1\_G The O-f'= 0.0071 Deviates from the B&C-Value 0.0101 Check  
PLAT985\_ALERT\_1\_G The Ni-f"= 1.0558 Deviates from the B&C-Value 1.0569 Check

---

0 **ALERT level A** = Most likely a serious problem - resolve or explain  
1 **ALERT level B** = A potentially serious problem, consider carefully  
8 **ALERT level C** = Check. Ensure it is not caused by an omission or oversight  
16 **ALERT level G** = General information/check it is not something unexpected

7 ALERT type 1 CIF construction/syntax error, inconsistent or missing data  
6 ALERT type 2 Indicator that the structure model may be wrong or deficient  
7 ALERT type 3 Indicator that the structure quality may be low  
3 ALERT type 4 Improvement, methodology, query or suggestion  
2 ALERT type 5 Informative message, check

---

---

It is advisable to attempt to resolve as many as possible of the alerts in all categories. Often the minor alerts point to easily fixed oversights, errors and omissions in your CIF or refinement strategy, so attention to these fine details can be worthwhile. In order to resolve some of the more serious problems it may be necessary to carry out additional measurements or structure refinements. However, the purpose of your study may justify the reported deviations and the more serious of these should normally be commented upon in the discussion or experimental section of a paper or in the "special\_details" fields of the CIF. checkCIF was carefully designed to identify outliers and unusual parameters, but every test has its limitations and alerts that are not important in a particular case may appear. Conversely, the absence of alerts does not guarantee there are no aspects of the results needing attention. It is up to the individual to critically assess their own results and, if necessary, seek expert advice.

### **Publication of your CIF in IUCr journals**

A basic structural check has been run on your CIF. These basic checks will be run on all CIFs submitted for publication in IUCr journals (*Acta Crystallographica*, *Journal of Applied Crystallography*, *Journal of Synchrotron Radiation*); however, if you intend to submit to *Acta Crystallographica Section C* or *E* or *IUCrData*, you should make sure that full publication checks are run on the final version of your CIF prior to submission.

### **Publication of your CIF in other journals**

Please refer to the *Notes for Authors* of the relevant journal for any special instructions relating to CIF submission.

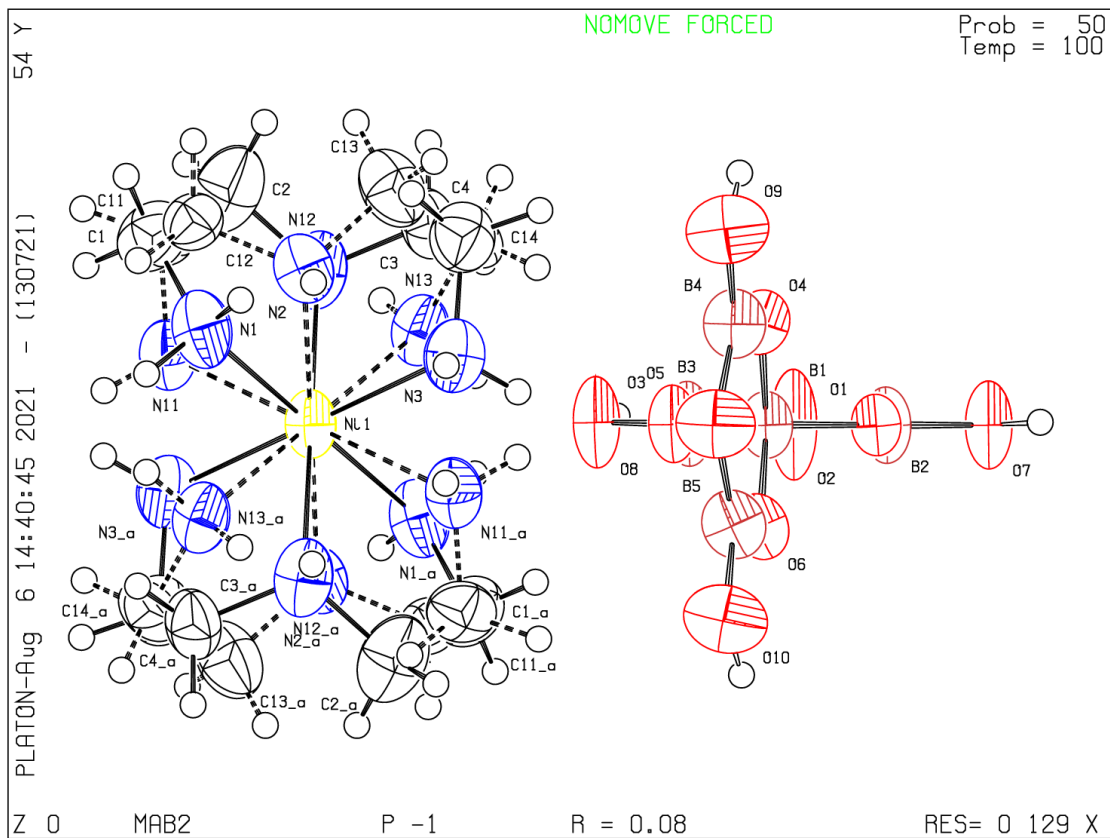

Supplement: s1 [file s1]
