# Supplementary material
Source: MDPI journal article supplement (https://www.mdpi.com/2304-6740/9/9/68)
Supplement: s1 [file s1]

## Supplementary X-Ray Crystallographic data

### Compound 1

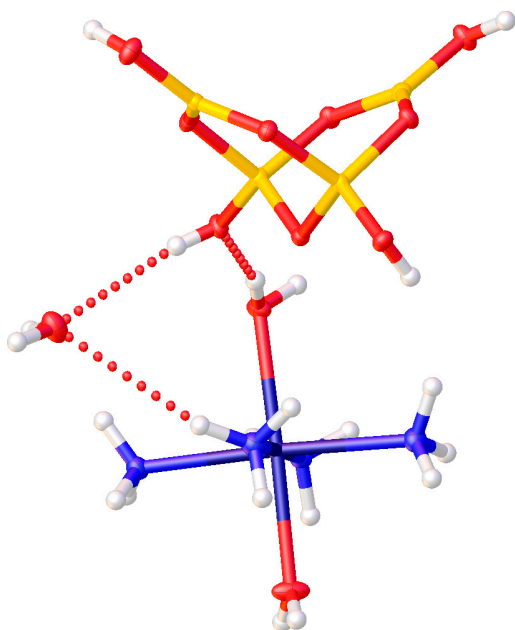

**Crystal Data.**  $B_4H_{22}N_4NiO_{12}$ ,  $M_r = 372.16$ , monoclinic,  $P2_1/c$  (No. 14),  $a = 8.27730(10) \text{ \AA}$ ,  $b = 20.5277(3) \text{ \AA}$ ,  $c = 8.01330(10) \text{ \AA}$ ,  $\beta = 91.2830(10)^\circ$ ,  $\alpha = \gamma = 90^\circ$ ,  $V = 1361.23(3) \text{ \AA}^3$ ,  $T = 100(2) \text{ K}$ ,  $Z = 4$ ,  $Z' = 1$ ,  $\mu(\text{Mo K}\alpha) = 1.492$ , 15477 reflections measured, 3128 unique ( $R_{\text{int}} = 0.0329$ ) which were used in all calculations. The final  $wR_2$  was 0.0528 (all data) and  $R_1$  was 0.0216 ( $I \geq 2 \sigma(I)$ ).

| Compound                              | MAB1                           |
|---------------------------------------|--------------------------------|
| Formula                               | $B_4H_{22}N_4NiO_{12}$         |
| $D_{\text{calc.}} / \text{g cm}^{-3}$ | 1.816                          |
| $\mu / \text{mm}^{-1}$                | 1.492                          |
| Formula Weight                        | 372.16                         |
| Colour                                | blue                           |
| Shape                                 | block-shaped                   |
| Size/ $\text{mm}^3$                   | $0.16 \times 0.12 \times 0.06$ |
| $T / \text{K}$                        | 100(2)                         |
| Crystal System                        | monoclinic                     |
| Space Group                           | $P2_1/c$                       |
| $a / \text{\AA}$                      | 8.27730(10)                    |
| $b / \text{\AA}$                      | 20.5277(3)                     |
| $c / \text{\AA}$                      | 8.01330(10)                    |
| $\alpha / ^\circ$                     | 90                             |
| $\beta / ^\circ$                      | 91.2830(10)                    |
| $\gamma / ^\circ$                     | 90                             |
| $V / \text{\AA}^3$                    | 1361.23(3)                     |
| $Z$                                   | 4                              |
| $Z'$                                  | 1                              |
| Wavelength/ $\text{\AA}$              | 0.71075                        |
| Radiation type                        | Mo $K\alpha$                   |
| $\theta_{\text{min}} / ^\circ$        | 2.461                          |
| $\theta_{\text{max}} / ^\circ$        | 27.481                         |
| Measured Refl's.                      | 15477                          |
| Indep't Refl's                        | 3128                           |
| Refl's $I \geq 2 \sigma(I)$           | 3021                           |
| $R_{\text{int}}$                      | 0.0329                         |
| Parameters                            | 278                            |
| Restraints                            | 0                              |
| Largest Peak                          | 0.340                          |
| Deepest Hole                          | -0.295                         |
| GooF                                  | 1.027                          |
| $wR_2$ (all data)                     | 0.0528                         |
| $wR_2$                                | 0.0523                         |
| $R_1$ (all data)                      | 0.0224                         |
| $R_1$                                 | 0.0216                         |

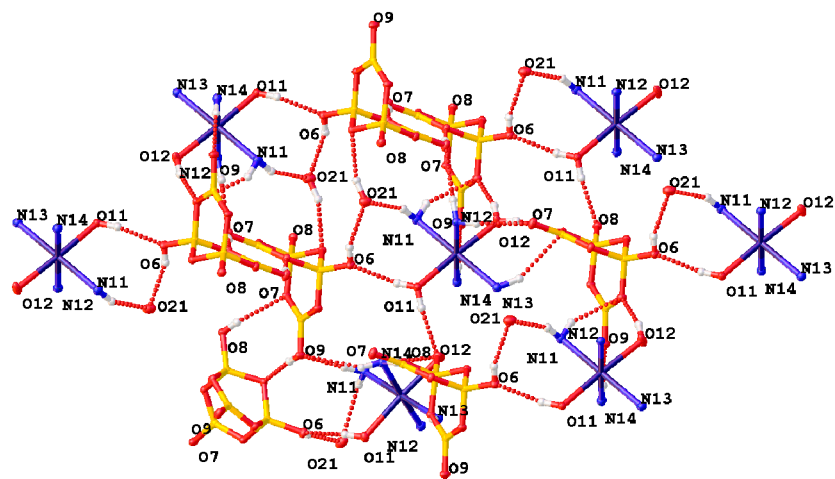

**Figure S1:** The following hydrogen bonding interactions with a maximum D-D distance of 2.9 Å and a minimum angle of 120 ° are present in **MAB1**: N11–O9\_1: 3.417 Å, O8–O5\_1: 3.166 Å, N12–O7\_2: 2.96 Å, N14–O8\_3: 3.023 Å, O6–O21: 2.843 Å, N14–O9\_1: 3.12 Å, N14–O9\_4: 3.187 Å, O12–O4\_4: 2.704 Å, N13–O5\_3: 3.332 Å, O12–O2\_2: 2.781 Å, N12–O7\_5: 3.053 Å, O21–O3\_5: 2.849 Å, O9–O3\_6: 2.681 Å, O11–O6: 2.684 Å, N13–O21\_7: 3.173 Å, O11–O8\_8: 2.725 Å, N13–O2\_2: 3.233 Å, O7–O1\_9: 2.659 Å, N11–O4\_4: 3.384 Å, N11–O21: 3.414 Å, O21–O11\_7: 2.964 Å.

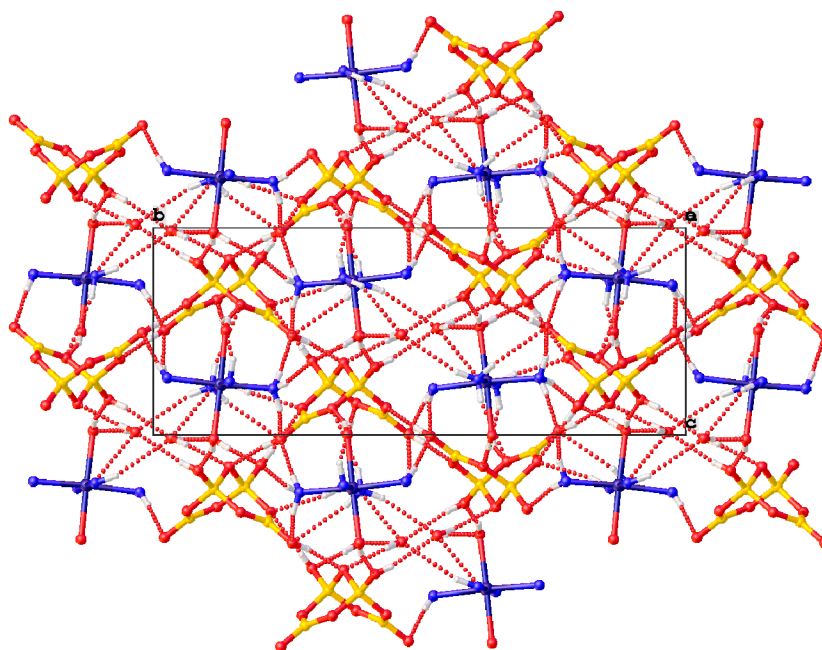

**Figure S2:** Packing diagram of MAB1.

**Table S1:** Fractional Atomic Coordinates ( $\times 10^4$ ) and Equivalent Isotropic Displacement Parameters ( $\text{\AA}^2 \times 10^3$ ) for **MAB1**.  $U_{eq}$  is defined as 1/3 of the trace of the orthogonalised  $U_{ij}$ .

| Atom | x          | y         | z          | $U_{eq}$  |
|------|------------|-----------|------------|-----------|
| O1   | 4873.0(11) | 4370.1(4) | 1330.1(11) | 10.51(18) |
| O2   | 7413.3(11) | 3808.0(4) | 1525.8(11) | 9.40(18)  |
| O3   | 5318.4(11) | 3572.2(4) | 3480.3(11) | 8.52(17)  |
| O4   | 3368.4(11) | 3361.6(4) | 1278.2(11) | 10.24(18) |
| O5   | 5911.6(11) | 2795.3(4) | 1289.3(11) | 9.66(18)  |
| O6   | 2768.2(11) | 4158.6(5) | 3291.1(12) | 11.29(19) |
| O7   | 7206.2(11) | 4792.2(5) | 56.6(12)   | 13.12(19) |
| O8   | 7840.2(11) | 2981.0(5) | 3561.3(12) | 10.34(18) |

| Atom | x           | y         | z           | $U_{eq}$  |
|------|-------------|-----------|-------------|-----------|
| O9   | 3577.4(11)  | 2392.7(5) | -200.5(12)  | 12.76(19) |
| B1   | 4073.4(17)  | 3866.5(7) | 2391.0(17)  | 8.9(3)    |
| B2   | 6478.5(17)  | 4322.4(7) | 996.0(17)   | 9.6(3)    |
| B3   | 6604.6(16)  | 3285.1(7) | 2494.0(17)  | 8.7(3)    |
| B4   | 4318.7(17)  | 2848.7(7) | 804.6(17)   | 9.7(3)    |
| Ni1  | 272.0(2)    | 3742.2(2) | 7428.7(2)   | 8.82(6)   |
| O11  | -2.6(12)    | 3869.7(5) | 4803.2(12)  | 11.83(19) |
| O12  | 386.3(13)   | 3642.1(6) | 10033.2(13) | 18.0(2)   |
| N11  | 2808.4(14)  | 3907.5(7) | 7322.8(16)  | 13.6(2)   |
| N12  | -46.3(14)   | 4741.8(6) | 7759.0(15)  | 11.8(2)   |
| N13  | -2265.0(14) | 3570.3(6) | 7558.8(15)  | 12.2(2)   |
| N14  | 712.5(15)   | 2749.8(6) | 7238.2(16)  | 13.4(2)   |
| O21  | 2991.3(13)  | 5335.7(5) | 5152.6(13)  | 18.7(2)   |

**Table S2:** Anisotropic Displacement Parameters ( $\times 10^4$ ) for **MAB1**. The anisotropic displacement factor exponent takes the form:  $-2\pi^2[h^2a^{*2} \times U_{11} + \dots + 2hka^* \times b^* \times U_{12}]$

| Atom | $U_{11}$ | $U_{22}$ | $U_{33}$ | $U_{23}$ | $U_{13}$ | $U_{12}$ |
|------|----------|----------|----------|----------|----------|----------|
| O1   | 8.9(4)   | 9.7(4)   | 12.9(4)  | 3.1(3)   | 1.0(3)   | 1.1(3)   |
| O2   | 7.8(4)   | 9.5(5)   | 11.0(4)  | 0.9(3)   | 1.2(3)   | 0.3(3)   |
| O3   | 9.1(4)   | 8.1(4)   | 8.4(4)   | 0.0(3)   | 0.1(3)   | 0.3(3)   |
| O4   | 8.9(4)   | 10.1(4)  | 11.7(4)  | -1.4(3)  | -1.7(3)  | 0.5(3)   |
| O5   | 8.6(4)   | 9.4(4)   | 10.9(4)  | -2.7(3)  | -0.8(3)  | 0.6(3)   |
| O6   | 10.8(4)  | 9.2(5)   | 14.0(4)  | -2.3(4)  | 2.3(4)   | 0.4(4)   |
| O7   | 9.5(4)   | 12.4(5)  | 17.5(5)  | 5.2(4)   | 1.8(4)   | 1.6(4)   |
| O8   | 9.9(4)   | 10.3(5)  | 10.7(4)  | 1.9(4)   | -1.1(4)  | 0.2(4)   |
| O9   | 9.3(4)   | 13.2(5)  | 15.8(5)  | -5.9(4)  | -0.7(4)  | 0.5(4)   |
| B1   | 8.5(6)   | 8.7(6)   | 9.6(6)   | 0.5(5)   | 0.3(5)   | 0.1(5)   |
| B2   | 11.0(6)  | 9.0(7)   | 8.8(6)   | -1.6(5)  | -0.4(5)  | -0.2(5)  |
| B3   | 8.4(6)   | 8.4(7)   | 9.3(6)   | -0.3(5)  | -0.7(5)  | -0.2(5)  |
| B4   | 10.2(6)  | 10.0(7)  | 8.8(6)   | 1.3(5)   | 0.7(5)   | -0.6(5)  |
| Ni1  | 7.75(9)  | 9.84(10) | 8.85(9)  | -0.32(6) | 0.05(6)  | 0.30(6)  |
| O11  | 11.0(4)  | 14.4(5)  | 10.1(4)  | -1.7(4)  | 1.0(4)   | -2.3(4)  |
| O12  | 9.6(5)   | 34.4(6)  | 9.9(5)   | 1.2(4)   | 0.3(4)   | 5.6(4)   |
| N11  | 11.1(5)  | 15.6(6)  | 14.2(6)  | -1.5(5)  | 0.6(4)   | 0.6(5)   |
| N12  | 10.0(5)  | 12.2(6)  | 13.1(5)  | -1.7(4)  | 0.0(4)   | 0.6(4)   |
| N13  | 10.9(5)  | 12.4(6)  | 13.3(5)  | -0.9(5)  | 0.1(4)   | -0.2(4)  |
| N14  | 12.2(5)  | 13.0(6)  | 14.9(6)  | -0.3(5)  | 2.5(5)   | 0.6(5)   |
| O21  | 16.1(5)  | 16.2(5)  | 23.7(5)  | -5.7(4)  | -3.3(4)  | 1.5(4)   |

**Table S3:** Bond Lengths in Å for **MAB1**.

| Atom | Atom | Length/Å   | Atom | Atom | Length/Å   |
|------|------|------------|------|------|------------|
| O1   | B1   | 1.5015(17) | O7   | B2   | 1.3710(17) |
| O1   | B2   | 1.3651(17) | O8   | B3   | 1.4588(16) |
| O2   | B2   | 1.3709(17) | O9   | B4   | 1.3708(17) |
| O2   | B3   | 1.4917(16) | Ni1  | O11  | 2.1272(10) |
| O3   | B1   | 1.4658(16) | Ni1  | O12  | 2.0972(10) |
| O3   | B3   | 1.4640(16) | Ni1  | N11  | 2.1303(12) |
| O4   | B1   | 1.4787(16) | Ni1  | N12  | 2.0864(12) |
| O4   | B4   | 1.3729(17) | Ni1  | N13  | 2.1342(12) |
| O5   | B3   | 1.4991(16) | Ni1  | N14  | 2.0759(12) |
| O5   | B4   | 1.3705(16) |      |      |            |
| O6   | B1   | 1.4428(17) |      |      |            |

**Table S4:** Bond Angles in ° for **MAB1**.

| Atom | Atom | Atom | Angle/°    | Atom | Atom | Atom | Angle/°    |
|------|------|------|------------|------|------|------|------------|
| B2   | O1   | B1   | 120.34(10) | O8   | B3   | O5   | 110.10(10) |
| B2   | O2   | B3   | 117.29(10) | O5   | B4   | O4   | 122.45(12) |
| B3   | O3   | B1   | 110.76(9)  | O5   | B4   | O9   | 121.80(12) |
| B4   | O4   | B1   | 118.92(10) | O9   | B4   | O4   | 115.75(11) |
| B4   | O5   | B3   | 118.73(10) | O11  | Ni1  | N11  | 91.41(4)   |
| O3   | B1   | O1   | 107.94(10) | O11  | Ni1  | N13  | 89.15(4)   |
| O3   | B1   | O4   | 109.44(11) | O12  | Ni1  | O11  | 176.16(4)  |
| O4   | B1   | O1   | 108.30(10) | O12  | Ni1  | N11  | 91.87(5)   |
| O6   | B1   | O1   | 109.96(11) | O12  | Ni1  | N13  | 87.57(5)   |
| O6   | B1   | O3   | 113.45(10) | N11  | Ni1  | N13  | 179.37(5)  |
| O6   | B1   | O4   | 107.64(10) | N12  | Ni1  | O11  | 89.63(4)   |
| O1   | B2   | O2   | 122.67(12) | N12  | Ni1  | O12  | 88.46(5)   |
| O1   | B2   | O7   | 119.92(12) | N12  | Ni1  | N11  | 88.61(5)   |
| O2   | B2   | O7   | 117.39(12) | N12  | Ni1  | N13  | 91.68(5)   |
| O2   | B3   | O5   | 108.51(10) | N14  | Ni1  | O11  | 93.61(4)   |
| O3   | B3   | O2   | 109.35(10) | N14  | Ni1  | O12  | 88.45(5)   |
| O3   | B3   | O5   | 110.20(10) | N14  | Ni1  | N11  | 88.77(5)   |
| O8   | B3   | O2   | 107.22(10) | N14  | Ni1  | N12  | 175.88(5)  |
| O8   | B3   | O3   | 111.38(10) | N14  | Ni1  | N13  | 90.91(5)   |

**Table S5:** Torsion Angles in ° for **MAB1**.

| Atom | Atom | Atom | Atom | Angle/°     |
|------|------|------|------|-------------|
| B1   | O1   | B2   | O2   | 3.28(18)    |
| B1   | O1   | B2   | O7   | -178.56(11) |
| B1   | O3   | B3   | O2   | 62.60(13)   |
| B1   | O3   | B3   | O5   | -56.59(13)  |
| B1   | O3   | B3   | O8   | -179.08(10) |
| B1   | O4   | B4   | O5   | -1.75(18)   |
| B1   | O4   | B4   | O9   | 178.77(11)  |
| B2   | O1   | B1   | O3   | 25.21(15)   |
| B2   | O1   | B1   | O4   | -93.19(13)  |
| B2   | O1   | B1   | O6   | 149.45(11)  |
| B2   | O2   | B3   | O3   | -32.51(14)  |
| B2   | O2   | B3   | O5   | 87.72(13)   |
| B2   | O2   | B3   | O8   | -153.39(10) |
| B3   | O2   | B2   | O1   | 0.41(18)    |
| B3   | O2   | B2   | O7   | -177.79(11) |
| B3   | O3   | B1   | O1   | -57.89(13)  |
| B3   | O3   | B1   | O4   | 59.78(13)   |
| B3   | O3   | B1   | O6   | 180.00(10)  |
| B3   | O5   | B4   | O4   | 5.17(18)    |
| B3   | O5   | B4   | O9   | -175.38(11) |
| B4   | O4   | B1   | O1   | 87.04(13)   |
| B4   | O4   | B1   | O3   | -30.40(15)  |
| B4   | O4   | B1   | O6   | -154.11(11) |
| B4   | O5   | B3   | O2   | -95.70(13)  |
| B4   | O5   | B3   | O3   | 24.01(15)   |
| B4   | O5   | B3   | O8   | 147.25(11)  |

**Table S6:** Hydrogen Fractional Atomic Coordinates ( $\times 10^4$ ) and Equivalent Isotropic Displacement Parameters ( $\text{\AA}^2 \times 10^3$ ) for **MAB1**.  $U_{eq}$  is defined as 1/3 of the trace of the orthogonalised  $U_{ij}$ .

| Atom | x        | y        | z        | $U_{eq}$ |
|------|----------|----------|----------|----------|
| H6   | 3040(20) | 4461(9)  | 3650(20) | 10(4)    |
| H7   | 6550(30) | 5061(11) | -340(30) | 35(6)    |



| Atom | x         | y        | z         | $U_{eq}$ |
|------|-----------|----------|-----------|----------|
| H8   | 7450(20)  | 2784(9)  | 4220(20)  | 17(5)    |
| H9   | 4180(30)  | 2100(10) | -510(20)  | 30(5)    |
| H11A | 820(30)   | 3896(10) | 4290(20)  | 25(5)    |
| H11B | -570(30)  | 3597(10) | 4370(30)  | 29(5)    |
| H12A | 1230(30)  | 3601(10) | 10560(30) | 33(6)    |
| H12B | -320(30)  | 3702(9)  | 10600(30) | 21(5)    |
| H11C | 3270(20)  | 3641(10) | 6640(30)  | 25(5)    |
| H11D | 3270(30)  | 3846(10) | 8310(30)  | 33(6)    |
| H11E | 3110(30)  | 4293(11) | 6970(30)  | 34(6)    |
| H12C | -900(30)  | 4819(10) | 8260(20)  | 28(5)    |
| H12D | 760(20)   | 4897(9)  | 8350(20)  | 24(5)    |
| H12E | -70(30)   | 4985(12) | 6890(30)  | 46(6)    |
| H13A | -2670(30) | 3222(11) | 7080(30)  | 35(6)    |
| H13B | -2850(30) | 3912(11) | 7200(30)  | 33(5)    |
| H13C | -2540(20) | 3502(10) | 8640(30)  | 31(5)    |
| H14A | -140(20)  | 2526(10) | 7480(20)  | 19(5)    |
| H14B | 990(20)   | 2626(9)  | 6260(30)  | 25(5)    |
| H14C | 1500(30)  | 2630(10) | 7950(20)  | 29(5)    |
| H21A | 3740(30)  | 5606(11) | 5430(30)  | 44(6)    |
| H21B | 2040(30)  | 5508(12) | 5220(30)  | 50(7)    |

**Table S7:** Hydrogen Bond information for **MAB1**.

| D   | H    | A                | d(D-H)/Å  | d(H-A)/Å  | d(D-A)/Å   | D-H-A/deg |
|-----|------|------------------|-----------|-----------|------------|-----------|
| O6  | H6   | O21              | 0.719(18) | 2.161(18) | 2.8434(15) | 158.9(18) |
| O7  | H7   | O1 <sup>1</sup>  | 0.83(2)   | 1.83(2)   | 2.6585(13) | 177(2)    |
| O8  | H8   | O5 <sup>2</sup>  | 0.743(19) | 2.43(2)   | 3.1658(13) | 173.6(19) |
| O9  | H9   | O3 <sup>3</sup>  | 0.82(2)   | 1.87(2)   | 2.6807(13) | 171(2)    |
| O11 | H11A | O6               | 0.81(2)   | 1.89(2)   | 2.6841(14) | 167(2)    |
| O11 | H11B | O8 <sup>4</sup>  | 0.81(2)   | 1.92(2)   | 2.7253(14) | 171(2)    |
| O12 | H12A | O4 <sup>5</sup>  | 0.81(2)   | 1.92(2)   | 2.7036(14) | 164(2)    |
| O12 | H12B | O2 <sup>6</sup>  | 0.76(2)   | 2.04(2)   | 2.7810(14) | 164(2)    |
| N11 | H11C | O9 <sup>2</sup>  | 0.87(2)   | 2.60(2)   | 3.4170(16) | 157.4(17) |
| N11 | H11D | O4 <sup>5</sup>  | 0.87(2)   | 2.58(2)   | 3.3839(16) | 153.0(18) |
| N11 | H11E | O21              | 0.88(2)   | 2.59(2)   | 3.4137(18) | 156.7(18) |
| N12 | H12C | O7 <sup>6</sup>  | 0.83(2)   | 2.15(2)   | 2.9597(15) | 162.5(19) |
| N12 | H12D | O7 <sup>7</sup>  | 0.87(2)   | 2.18(2)   | 3.0531(15) | 175.3(17) |
| N13 | H13A | O5 <sup>8</sup>  | 0.87(2)   | 2.47(2)   | 3.3320(15) | 167.7(19) |
| N13 | H13B | O21 <sup>9</sup> | 0.89(2)   | 2.44(2)   | 3.1729(16) | 139.7(18) |
| N13 | H13C | O2 <sup>6</sup>  | 0.91(2)   | 2.40(2)   | 3.2329(15) | 152.3(18) |
| N14 | H14A | O8 <sup>8</sup>  | 0.87(2)   | 2.17(2)   | 3.0232(16) | 169.6(16) |
| N14 | H14B | O9 <sup>2</sup>  | 0.86(2)   | 2.47(2)   | 3.1201(16) | 133.5(16) |
| N14 | H14C | O9 <sup>5</sup>  | 0.89(2)   | 2.30(2)   | 3.1868(15) | 176.3(18) |
| O21 | H21A | O3 <sup>7</sup>  | 0.86(2)   | 2.04(2)   | 2.8487(14) | 155(2)    |
| O21 | H21B | O11 <sup>9</sup> | 0.86(3)   | 2.12(3)   | 2.9641(15) | 166(2)    |

----

<sup>1</sup>1-x,1-y,-z; <sup>2</sup>x,1/2-y,1/2+z; <sup>3</sup>x,1/2-y,-1/2+z; <sup>4</sup>-1+x,y,z; <sup>5</sup>x,y,1+z; <sup>6</sup>-1+x,y,1+z; <sup>7</sup>1-x,1-y,1-z; <sup>8</sup>-1+x,1/2-y,1/2+z; <sup>9</sup>-x,1-y,1-z

## Compound 2

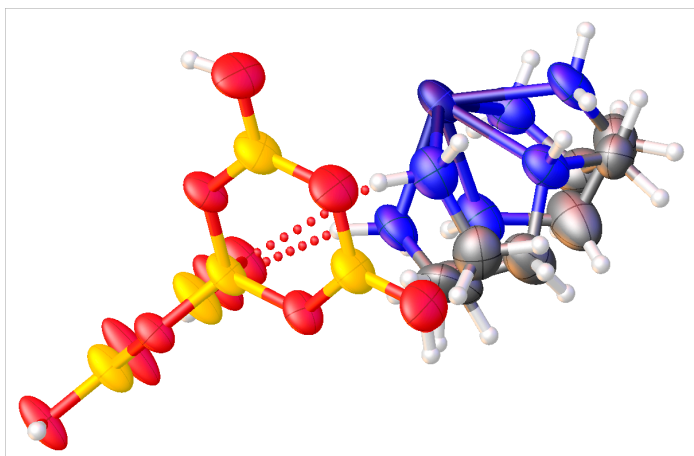

**Crystal Data.**  $\text{C}_8\text{H}_{34}\text{B}_{10}\text{N}_6\text{NiO}_{20}$ ,  $M_r = 701.22$ , triclinic,  $P-1$  (No. 2),  $a = 8.5763(5) \text{ \AA}$ ,  $b = 9.2902(6) \text{ \AA}$ ,  $c = 9.3493(6) \text{ \AA}$ ,  $\alpha = 78.098(5)^\circ$ ,  $\beta = 89.108(5)^\circ$ ,  $\gamma = 89.110(5)^\circ$ ,  $V = 728.75(8) \text{ \AA}^3$ ,  $T = 100(2) \text{ K}$ ,  $Z = 1$ ,  $Z' = 0.5$ ,  $\mu(\text{Synchrotron}) = 0.699$ , 6342 reflections measured, 3152 unique ( $R_{\text{int}} = 0.0476$ ) which were used in all calculations. The final  $wR_2$  was 0.2109 (all data) and  $R_1$  was 0.0767 ( $I \geq 2 \sigma(I)$ ).

| Compound                              | MAB2                                                            |
|---------------------------------------|-----------------------------------------------------------------|
| Formula                               | $\text{C}_8\text{H}_{34}\text{B}_{10}\text{N}_6\text{NiO}_{20}$ |
| $D_{\text{calc.}} / \text{g cm}^{-3}$ | 1.598                                                           |
| $\mu / \text{mm}^{-1}$                | 0.699                                                           |
| Formula Weight                        | 701.22                                                          |
| Colour                                | orange                                                          |
| Shape                                 | blade-shaped                                                    |
| Size/ $\text{mm}^3$                   | $0.02 \times 0.02 \times 0.01$                                  |
| $T / \text{K}$                        | 100(2)                                                          |
| Crystal System                        | triclinic                                                       |
| Space Group                           | $P-1$                                                           |
| $a / \text{\AA}$                      | 8.5763(5)                                                       |
| $b / \text{\AA}$                      | 9.2902(6)                                                       |
| $c / \text{\AA}$                      | 9.3493(6)                                                       |
| $\alpha / ^\circ$                     | 78.098(5)                                                       |
| $\beta / ^\circ$                      | 89.108(5)                                                       |
| $\gamma / ^\circ$                     | 89.110(5)                                                       |
| $V / \text{\AA}^3$                    | 728.75(8)                                                       |
| $Z$                                   | 1                                                               |
| $Z'$                                  | 0.5                                                             |
| Wavelength/ $\text{\AA}$              | 0.6889                                                          |
| Radiation type                        | Synchrotron                                                     |
| $\theta_{\text{min}} / ^\circ$        | 2.728                                                           |
| $\theta_{\text{max}} / ^\circ$        | 26.572                                                          |
| Measured Refl's.                      | 6342                                                            |
| Indep't Refl's                        | 3152                                                            |
| Refl's $I \geq 2 \sigma(I)$           | 2526                                                            |
| $R_{\text{int}}$                      | 0.0476                                                          |
| Parameters                            | 273                                                             |
| Restraints                            | 0                                                               |
| Largest Peak                          | 1.314                                                           |
| Deepest Hole                          | -0.953                                                          |
| GooF                                  | 1.077                                                           |
| $wR_2$ (all data)                     | 0.2109                                                          |
| $wR_2$                                | 0.2025                                                          |
| $R_1$ (all data)                      | 0.0882                                                          |
| $R_1$                                 | 0.0767                                                          |

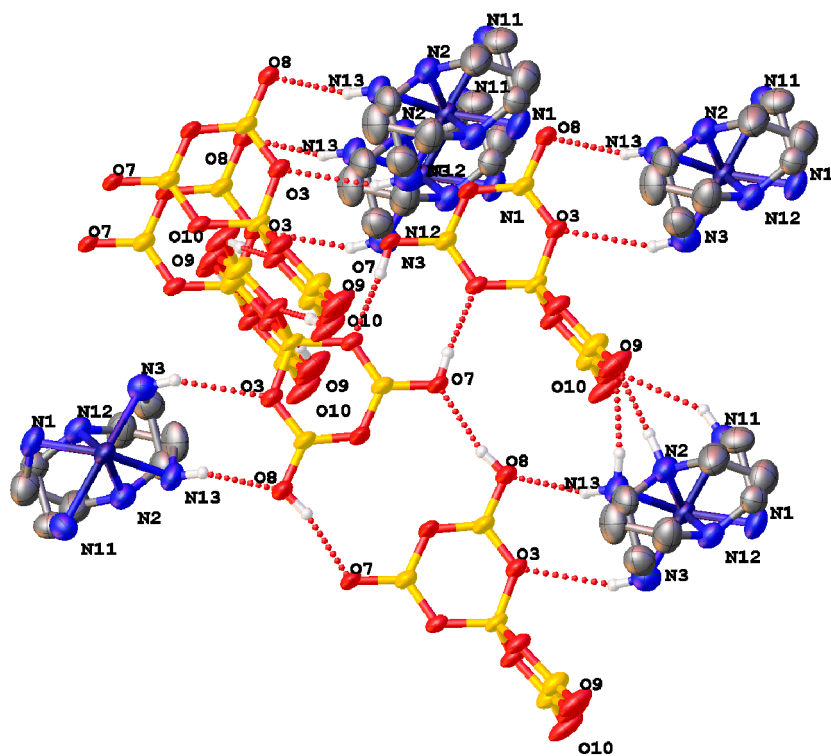

**Figure S1:** The following hydrogen bonding interactions with a maximum D-D distance of 2.9 Å and a minimum angle of 120° are present in **MAB2**: N1-O8\_5: 2.969 Å, N1-O10\_7: 3.208 Å, N2-O9\_6: 2.916 Å, N3-O3: 3.296 Å, N3-O5\_7: 3.382 Å, O7-O1\_1: 2.689 Å, O8-O7\_2: 2.826 Å, O9-O4\_3: 2.727 Å, O10-O6\_4: 2.735 Å, N11-O3\_5: 3.303 Å, N11-O5\_6: 3.372 Å, N12-O5\_7: 3.517 Å, N13-O8: 2.935 Å, N13-O9\_6: 3.216 Å.

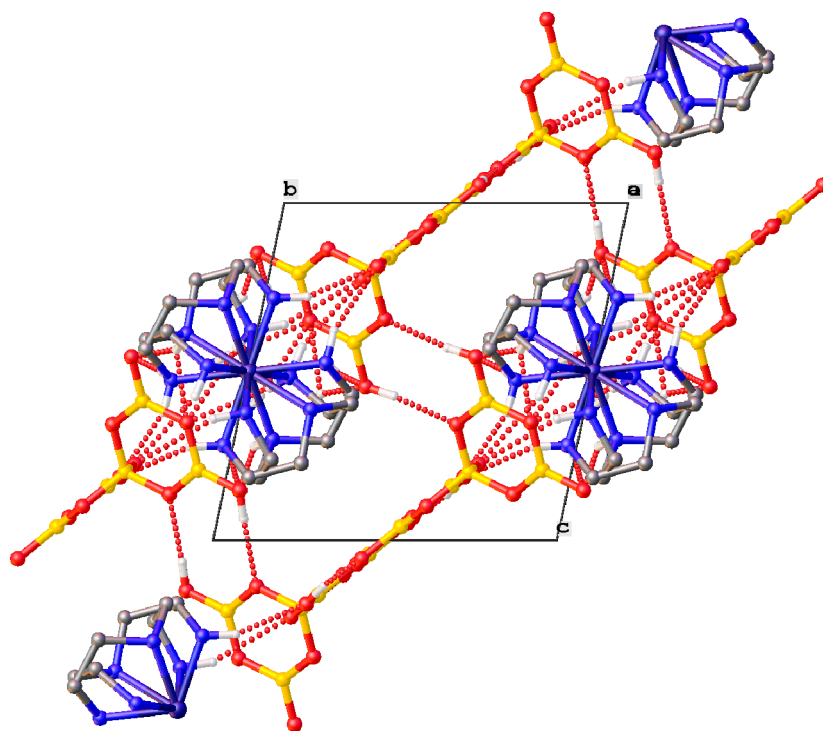

**Figure S2:** Packing diagram of **MAB2**.

**Table S1:** Fractional Atomic Coordinates ( $\times 10^4$ ) and Equivalent Isotropic Displacement Parameters ( $\text{\AA}^2 \times 10^3$ ) for **MAB2**.  $U_{eq}$  is defined as  $1/3$  of the trace of the orthogonalised  $U_{ij}$ .

| Atom | x         | y         | z        | $U_{eq}$ |
|------|-----------|-----------|----------|----------|
| Ni1  | 0         | 0         | 5000     | 45.2(3)  |
| N1   | 294(9)    | -2188(8)  | 4741(8)  | 61.9(19) |
| N2   | -906(8)   | -1114(8)  | 7007(8)  | 60.9(18) |
| N3   | 2141(8)   | -165(8)   | 6228(8)  | 61.9(19) |
| C1   | -890(20)  | -3132(17) | 5681(18) | 75(4)    |
| C2   | -1199(16) | -2718(13) | 7050(16) | 87(4)    |
| C3   | 210(15)   | -955(16)  | 8116(14) | 62(3)    |
| C4   | 1898(12)  | -1193(12) | 7606(12) | 69(2)    |
| O1   | 3989(3)   | 3999(3)   | 8983(3)  | 36.5(5)  |
| O2   | 1264(3)   | 4330(5)   | 9307(5)  | 76.8(12) |
| O3   | 2122(3)   | 2740(3)   | 7742(3)  | 47.9(7)  |
| O4   | 4536(3)   | 1554(3)   | 8634(3)  | 43.4(6)  |
| O5   | 6078(4)   | 1478(3)   | 6502(3)  | 61.8(9)  |
| O6   | 4538(3)   | 3633(3)   | 6559(3)  | 43.8(6)  |
| O7   | 2990(3)   | 5561(3)   | 10535(3) | 53.9(8)  |
| O8   | -554(3)   | 3098(4)   | 8118(4)  | 58.9(8)  |
| O9   | 6248(4)   | -466(4)   | 8514(4)  | 65.4(9)  |
| O10  | 6255(4)   | 3497(4)   | 4556(4)  | 65.9(9)  |
| B1   | 3779(4)   | 2982(5)   | 7972(5)  | 40.2(9)  |
| B2   | 2784(5)   | 4619(5)   | 9592(5)  | 47.2(10) |
| B3   | 957(5)    | 3392(6)   | 8388(6)  | 53.9(12) |
| B4   | 5587(6)   | 854(6)    | 7911(6)  | 51.5(11) |
| B5   | 5597(6)   | 2893(6)   | 5873(5)  | 52.2(11) |
| N11  | -2137(10) | -1232(10) | 5163(10) | 59(2)    |
| N12  | 891(10)   | -2040(9)  | 6124(9)  | 53(2)    |
| N13  | -310(10)  | 277(9)    | 7177(9)  | 55(2)    |
| C11  | -1907(14) | -2623(14) | 6189(14) | 61(3)    |
| C12  | -197(17)  | -3166(17) | 5947(18) | 51(3)    |
| C13  | 1168(19)  | -2087(16) | 7710(14) | 77(4)    |
| C14  | 890(30)   | -665(19)  | 8131(18) | 71(5)    |

**Table S2:** Anisotropic Displacement Parameters ( $\times 10^4$ ) for **MAB2**. The anisotropic displacement factor exponent takes the form:  $-2\pi^2[h^2a^{*2} \times U_{11} + \dots + 2hka^* \times b^* \times U_{12}]$

| Atom | $U_{11}$ | $U_{22}$ | $U_{33}$ | $U_{23}$  | $U_{13}$ | $U_{12}$ |
|------|----------|----------|----------|-----------|----------|----------|
| Ni1  | 35.3(4)  | 57.9(5)  | 50.9(4)  | -31.5(3)  | 7.1(3)   | 3.0(3)   |
| N1   | 62(4)    | 74(4)    | 62(4)    | -43(4)    | 2(3)     | 13(3)    |
| N2   | 48(4)    | 73(4)    | 72(4)    | -39(4)    | 13(3)    | -4(3)    |
| N3   | 48(4)    | 68(4)    | 75(5)    | -26(4)    | 1(3)     | 0(3)     |
| C1   | 90(12)   | 57(6)    | 80(9)    | -22(6)    | 8(8)     | -3(8)    |
| C2   | 82(8)    | 92(7)    | 98(9)    | -44(7)    | 33(7)    | -25(6)   |
| C3   | 64(7)    | 76(7)    | 51(5)    | -27(5)    | 1(5)     | -9(5)    |
| C4   | 61(6)    | 67(5)    | 79(6)    | -17(5)    | -9(5)    | 3(5)     |
| O1   | 22.1(11) | 49.6(13) | 42.9(12) | -22.4(11) | 7.4(9)   | 4.3(9)   |
| O2   | 20.2(13) | 123(3)   | 120(3)   | -101(3)   | 4.7(15)  | 5.6(15)  |
| O3   | 25.4(12) | 68.5(16) | 62.5(16) | -43.8(14) | 5.9(10)  | 4.5(11)  |
| O4   | 31.7(13) | 49.8(13) | 53.5(15) | -23.9(12) | 14.1(10) | 6.5(10)  |
| O5   | 58(2)    | 67.9(19) | 60.4(18) | -19.8(15) | 25.8(15) | 22.4(15) |
| O6   | 32.1(13) | 60.1(15) | 45.0(14) | -25.8(12) | 8.7(10)  | 12.9(11) |
| O7   | 19.8(12) | 81.7(19) | 78.8(19) | -60.2(17) | 5.9(12)  | 5.4(12)  |
| O8   | 24.3(13) | 89(2)    | 83(2)    | -65.7(18) | 4.4(12)  | 4.2(13)  |
| O9   | 63(2)    | 62.3(18) | 71(2)    | -18.1(16) | 28.0(17) | 24.4(15) |
| O10  | 61(2)    | 78(2)    | 57.6(18) | -16.8(16) | 26.2(15) | 28.2(17) |
| B1   | 23.7(18) | 54(2)    | 50(2)    | -28.9(18) | 9.6(15)  | 8.0(15)  |
| B2   | 23.3(18) | 68(3)    | 62(3)    | -41(2)    | 6.4(16)  | 3.7(17)  |
| B3   | 23.3(19) | 81(3)    | 73(3)    | -54(3)    | 6.3(18)  | 5.9(19)  |
| B4   | 41(2)    | 60(3)    | 59(3)    | -27(2)    | 11.4(19) | 10(2)    |
| B5   | 41(2)    | 67(3)    | 53(2)    | -25(2)    | 12.5(19) | 11(2)    |

| Atom | $U_{11}$ | $U_{22}$ | $U_{33}$ | $U_{23}$ | $U_{13}$ | $U_{12}$ |
|------|----------|----------|----------|----------|----------|----------|
| N11  | 51(5)    | 73(5)    | 59(5)    | -25(4)   | 2(4)     | -8(4)    |
| N12  | 46(4)    | 66(5)    | 54(4)    | -26(4)   | 2(3)     | 11(4)    |
| N13  | 55(5)    | 59(5)    | 58(5)    | -33(4)   | 14(4)    | -2(4)    |
| C11  | 51(6)    | 72(7)    | 55(6)    | -4(5)    | 11(5)    | -4(5)    |
| C12  | 54(8)    | 43(5)    | 56(7)    | -10(4)   | -1(6)    | 3(6)     |
| C13  | 83(9)    | 85(9)    | 70(8)    | -32(7)   | -17(6)   | 19(8)    |
| C14  | 106(16)  | 68(9)    | 42(6)    | -14(6)   | -19(9)   | 1(10)    |

**Table S3:** Bond Lengths in Å for **MAB2**.

| Atom | Atom             | Length/Å  | Atom | Atom | Length/Å               |
|------|------------------|-----------|------|------|------------------------|
| Ni1  | N1               | 2.107(7)  | O2   | B3   | 1.375(5)               |
| Ni1  | N1 <sup>1</sup>  | 2.107(7)  | O3   | B1   | 1.469(5)               |
| Ni1  | N2               | 2.092(8)  | O3   | B3   | 1.358(5)               |
| Ni1  | N2 <sup>1</sup>  | 2.092(8)  | O4   | B1   | 1.488(5)               |
| Ni1  | N3               | 2.167(7)  | O4   | B4   | 1.355(5)               |
| Ni1  | N3 <sup>1</sup>  | 2.167(7)  | O5   | B4   | 1.387(6)               |
| Ni1  | N11              | 2.163(8)  | O5   | B5   | 1.384(6)               |
| Ni1  | N11 <sup>1</sup> | 2.162(8)  | O6   | B1   | 1.480(5)               |
| Ni1  | N12              | 2.107(8)  | O6   | B5   | 1.362(5)               |
| Ni1  | N12 <sup>1</sup> | 2.107(8)  | O7   | B2   | 1.379(5)               |
| Ni1  | N13 <sup>1</sup> | 2.115(8)  | O8   | B3   | 1.367(5)               |
| Ni1  | N13              | 2.115(8)  | O9   | B4   | 1.358(6)               |
| N1   | C1               | 1.503(17) | O10  | B5   | 1.361(6)               |
| N2   | C2               | 1.507(13) | N11  | C11  | 1.455(15)              |
| N2   | C3               | 1.453(14) | N12  | C12  | 1.449(17)              |
| N3   | C4               | 1.451(13) | N12  | C13  | 1.496(14)              |
| C1   | C2               | 1.43(2)   | N13  | C14  | 1.52(2)                |
| C3   | C4               | 1.544(17) | C11  | C12  | 1.572(18)              |
| O1   | B1               | 1.482(4)  | C13  | C14  | 1.47(2)                |
| O1   | B2               | 1.349(5)  | ---- |      |                        |
| O2   | B2               | 1.376(5)  |      |      | <sup>1</sup> -x,-y,1-z |

**Table S4:** Bond Angles in ° for **MAB2**.

| Atom             | Atom | Atom             | Angle/°  | Atom             | Atom | Atom             | Angle/°   |
|------------------|------|------------------|----------|------------------|------|------------------|-----------|
| N1               | Ni1  | N3               | 90.5(3)  | N12              | Ni1  | N13 <sup>1</sup> | 99.5(3)   |
| N1 <sup>1</sup>  | Ni1  | N3               | 89.5(3)  | N12              | Ni1  | N13              | 80.5(3)   |
| N1               | Ni1  | N13 <sup>1</sup> | 64.3(3)  | N12 <sup>1</sup> | Ni1  | N13 <sup>1</sup> | 80.5(3)   |
| N1 <sup>1</sup>  | Ni1  | N13 <sup>1</sup> | 115.7(3) | N12 <sup>1</sup> | Ni1  | N13              | 99.5(3)   |
| N2 <sup>1</sup>  | Ni1  | N1               | 99.8(3)  | N13              | Ni1  | N3 <sup>1</sup>  | 114.0(3)  |
| N2               | Ni1  | N1               | 80.2(3)  | N13 <sup>1</sup> | Ni1  | N3 <sup>1</sup>  | 66.0(3)   |
| N2 <sup>1</sup>  | Ni1  | N3               | 97.5(3)  | N13 <sup>1</sup> | Ni1  | N11 <sup>1</sup> | 90.4(3)   |
| N2               | Ni1  | N3               | 82.5(3)  | N13              | Ni1  | N11 <sup>1</sup> | 89.6(3)   |
| N2               | Ni1  | N13 <sup>1</sup> | 140.1(3) | N13 <sup>1</sup> | Ni1  | N11              | 89.6(3)   |
| N2 <sup>1</sup>  | Ni1  | N13 <sup>1</sup> | 39.9(3)  | N13              | Ni1  | N11              | 90.4(3)   |
| N3 <sup>1</sup>  | Ni1  | N3               | 180.0    | N13 <sup>1</sup> | Ni1  | N13              | 180.0     |
| N11              | Ni1  | N3 <sup>1</sup>  | 44.4(3)  | C1               | N1   | Ni1              | 108.9(7)  |
| N11 <sup>1</sup> | Ni1  | N3 <sup>1</sup>  | 135.6(3) | C2               | N2   | Ni1              | 113.2(6)  |
| N11 <sup>1</sup> | Ni1  | N11              | 180.0    | C3               | N2   | Ni1              | 106.9(6)  |
| N12 <sup>1</sup> | Ni1  | N1 <sup>1</sup>  | 39.7(3)  | C3               | N2   | C2               | 110.4(10) |
| N12              | Ni1  | N1 <sup>1</sup>  | 140.3(3) | C4               | N3   | Ni1              | 108.2(6)  |
| N12              | Ni1  | N3 <sup>1</sup>  | 121.8(3) | C2               | C1   | N1               | 113.8(11) |
| N12 <sup>1</sup> | Ni1  | N3 <sup>1</sup>  | 58.2(3)  | C1               | C2   | N2               | 113.1(11) |
| N12              | Ni1  | N11              | 82.0(3)  | N2               | C3   | C4               | 111.2(10) |
| N12 <sup>1</sup> | Ni1  | N11 <sup>1</sup> | 82.0(3)  | N3               | C4   | C3               | 107.2(9)  |
| N12              | Ni1  | N11 <sup>1</sup> | 98.0(3)  | B2               | O1   | B1               | 123.1(3)  |
| N12 <sup>1</sup> | Ni1  | N11              | 98.0(3)  | B3               | O2   | B2               | 119.7(3)  |
| N12 <sup>1</sup> | Ni1  | N12              | 180.0(3) | B3               | O3   | B1               | 122.7(3)  |

| Atom | Atom | Atom | Angle/°  | Atom                   | Atom | Atom | Angle/°   |
|------|------|------|----------|------------------------|------|------|-----------|
| B4   | O4   | B1   | 123.4(3) | O4                     | B4   | O9   | 123.0(4)  |
| B5   | O5   | B4   | 119.5(3) | O9                     | B4   | O5   | 116.0(4)  |
| B5   | O6   | B1   | 123.3(3) | O6                     | B5   | O5   | 121.1(4)  |
| O1   | B1   | O4   | 107.8(3) | O10                    | B5   | O5   | 116.4(4)  |
| O3   | B1   | O1   | 111.6(3) | O10                    | B5   | O6   | 122.5(4)  |
| O3   | B1   | O4   | 109.1(3) | C11                    | N11  | Ni1  | 108.6(7)  |
| O3   | B1   | O6   | 109.6(3) | C12                    | N12  | Ni1  | 107.8(7)  |
| O6   | B1   | O1   | 108.2(3) | C12                    | N12  | C13  | 110.6(11) |
| O6   | B1   | O4   | 110.5(3) | C13                    | N12  | Ni1  | 113.3(7)  |
| O1   | B2   | O2   | 121.3(3) | C14                    | N13  | Ni1  | 108.8(9)  |
| O1   | B2   | O7   | 122.7(3) | N11                    | C11  | C12  | 107.2(9)  |
| O2   | B2   | O7   | 116.0(3) | N12                    | C12  | C11  | 109.3(12) |
| O3   | B3   | O2   | 121.6(4) | C14                    | C13  | N12  | 113.3(11) |
| O3   | B3   | O8   | 118.8(4) | C13                    | C14  | N13  | 112.4(12) |
| O8   | B3   | O2   | 119.5(4) | ----                   |      |      |           |
| O4   | B4   | O5   | 121.0(4) | <sup>1</sup> -x,-y,1-z |      |      |           |

**Table S5:** Torsion Angles in ° for **MAB2**.

| Atom | Atom | Atom | Atom | Angle/°    |
|------|------|------|------|------------|
| Ni1  | N1   | C1   | C2   | -36.8(16)  |
| Ni1  | N2   | C2   | C1   | -3.8(16)   |
| Ni1  | N2   | C3   | C4   | -43.5(11)  |
| Ni1  | N3   | C4   | C3   | -37.3(10)  |
| Ni1  | N11  | C11  | C12  | -37.9(12)  |
| Ni1  | N12  | C12  | C11  | -44.4(12)  |
| Ni1  | N12  | C13  | C14  | -5.0(18)   |
| Ni1  | N13  | C14  | C13  | -38.0(18)  |
| N1   | C1   | C2   | N2   | 27(2)      |
| N2   | C3   | C4   | N3   | 55.8(13)   |
| C2   | N2   | C3   | C4   | 80.0(11)   |
| C3   | N2   | C2   | C1   | -123.6(14) |
| B1   | O1   | B2   | O2   | 0.3(7)     |
| B1   | O1   | B2   | O7   | 179.8(4)   |
| B1   | O3   | B3   | O2   | 0.0(8)     |
| B1   | O3   | B3   | O8   | -179.6(4)  |
| B1   | O4   | B4   | O5   | 3.0(6)     |
| B1   | O4   | B4   | O9   | -178.6(4)  |
| B1   | O6   | B5   | O5   | -2.6(6)    |
| B1   | O6   | B5   | O10  | 178.4(4)   |
| B2   | O1   | B1   | O3   | -0.4(5)    |
| B2   | O1   | B1   | O4   | -120.3(4)  |
| B2   | O1   | B1   | O6   | 120.2(4)   |
| B2   | O2   | B3   | O3   | -0.3(9)    |
| B2   | O2   | B3   | O8   | 179.4(5)   |
| B3   | O2   | B2   | O1   | 0.1(8)     |
| B3   | O2   | B2   | O7   | -179.5(5)  |
| B3   | O3   | B1   | O1   | 0.3(6)     |
| B3   | O3   | B1   | O4   | 119.3(4)   |
| B3   | O3   | B1   | O6   | -119.5(4)  |
| B4   | O4   | B1   | O1   | -128.3(4)  |
| B4   | O4   | B1   | O3   | 110.4(4)   |
| B4   | O4   | B1   | O6   | -10.3(5)   |
| B4   | O5   | B5   | O6   | -6.0(7)    |
| B4   | O5   | B5   | O10  | 173.0(4)   |
| B5   | O5   | B4   | O4   | 5.8(7)     |
| B5   | O5   | B4   | O9   | -172.7(4)  |
| B5   | O6   | B1   | O1   | 127.9(4)   |
| B5   | O6   | B1   | O3   | -110.3(4)  |
| B5   | O6   | B1   | O4   | 10.0(5)    |
| N11  | C11  | C12  | N12  | 56.4(14)   |

| Atom | Atom | Atom | Atom | Angle/°    |
|------|------|------|------|------------|
| N12  | C13  | C14  | N13  | 28(2)      |
| C12  | N12  | C13  | C14  | -126.2(16) |
| C13  | N12  | C12  | C11  | 80.0(12)   |

**Table S6:** Hydrogen Fractional Atomic Coordinates ( $\times 10^4$ ) and Equivalent Isotropic Displacement Parameters ( $\text{\AA}^2 \times 10^3$ ) for **MAB2**.  $U_{eq}$  is defined as 1/3 of the trace of the orthogonalised  $U_{ij}$ .

| Atom | x        | y        | z        | $U_{eq}$ |
|------|----------|----------|----------|----------|
| H1A  | 166.37   | -2235.45 | 3787.68  | 74       |
| H1B  | 1272.3   | -2517.94 | 5009.95  | 74       |
| H2   | -1911.53 | -629.31  | 7208.87  | 73       |
| H3A  | 2934.97  | -488.91  | 5713.58  | 74       |
| H3B  | 2396.43  | 733.17   | 6393.8   | 74       |
| H1C  | -1881.23 | -3076.5  | 5136.96  | 90       |
| H1D  | -522.14  | -4166.93 | 5868.94  | 90       |
| H2A  | -530.37  | -3321.24 | 7805.05  | 105      |
| H2B  | -2299.26 | -2935.25 | 7340.25  | 105      |
| H3C  | -18.19   | -1680.56 | 9027.41  | 74       |
| H3D  | 102.69   | 41.24    | 8332.22  | 74       |
| H4A  | 2647.93  | -1008.4  | 8340.18  | 82       |
| H4B  | 2049.39  | -2216.06 | 7474.08  | 82       |
| H7   | 3946.72  | 5641.79  | 10675.38 | 81       |
| H8   | -1154.79 | 3498.7   | 8642.66  | 88       |
| H9   | 5881.3   | -761.47  | 9360.36  | 98       |
| H10  | 5932.1   | 4367.82  | 4286.54  | 99       |
| H11A | -2930.74 | -710.88  | 5479.9   | 71       |
| H11B | -2389.54 | -1399.86 | 4270.02  | 71       |
| H12  | 1906.48  | -2235.4  | 5654.96  | 64       |
| H13A | -190.95  | 1239.58  | 7216.69  | 66       |
| H13B | -1288.29 | 2.5      | 7502.41  | 66       |
| H11C | -2668.24 | -3353.87 | 6010.17  | 73       |
| H11D | -2050.89 | -2485.65 | 7205.54  | 73       |
| H12A | 29.03    | -4086.32 | 6664.38  | 61       |
| H12B | -84.29   | -3372.71 | 4953.01  | 61       |
| H13C | 473.24   | -2828.4  | 8301.8   | 92       |
| H13D | 2257.81  | -2408.45 | 7939.29  | 92       |
| H14A | 1886.41  | -126.28  | 8058.71  | 85       |
| H14B | 530.68   | -840.17  | 9162.61  | 85       |

**Table S7:** Hydrogen Bond information for **MAB2**.

| D   | H    | A                | d(D-H)/\AA | d(H-A)/\AA | d(D-A)/\AA | D-H-A/deg |
|-----|------|------------------|------------|------------|------------|-----------|
| N1  | H1A  | O8 <sup>1</sup>  | 0.91       | 2.12       | 2.970(7)   | 155.2     |
| N1  | H1B  | O10 <sup>2</sup> | 0.91       | 2.30       | 3.208(8)   | 172.8     |
| N2  | H2   | O9 <sup>3</sup>  | 1.00       | 2.00       | 2.916(7)   | 150.6     |
| N3  | H3A  | O5 <sup>2</sup>  | 0.91       | 2.56       | 3.382(8)   | 150.4     |
| N3  | H3B  | O3               | 0.91       | 2.46       | 3.295(8)   | 152.2     |
| O7  | H7   | O1 <sup>4</sup>  | 0.84       | 1.85       | 2.689(3)   | 174.4     |
| O8  | H8   | O7 <sup>5</sup>  | 0.84       | 2.01       | 2.826(3)   | 164.7     |
| O9  | H9   | O4 <sup>6</sup>  | 0.84       | 1.90       | 2.727(4)   | 168.7     |
| O10 | H10  | O6 <sup>7</sup>  | 0.84       | 1.90       | 2.734(4)   | 170.7     |
| N11 | H11A | O5 <sup>3</sup>  | 0.91       | 2.55       | 3.372(10)  | 150.8     |
| N11 | H11B | O3 <sup>1</sup>  | 0.91       | 2.47       | 3.302(9)   | 152.8     |
| N12 | H12  | O5 <sup>2</sup>  | 1.00       | 2.63       | 3.517(9)   | 148.5     |
| N13 | H13A | O8               | 0.91       | 2.09       | 2.936(8)   | 154.2     |
| N13 | H13B | O9 <sup>3</sup>  | 0.91       | 2.31       | 3.216(9)   | 172.5     |

----  
<sup>1</sup>-x,-y,1-z; <sup>2</sup>1-x,-y,1-z; <sup>3</sup>-1+x,+y,+z; <sup>4</sup>1-x,1-y,2-z; <sup>5</sup>-x,1-y,2-z; <sup>6</sup>1-x,-y,2-z; <sup>7</sup>1-x,1-y,1-z

**Table S8:** Atomic Occupancies for all atoms that are not fully occupied in **MAB2**.

| <b>Atom</b> | <b>Occupancy</b> | <b>Atom</b> | <b>Occupancy</b> | <b>Atom</b> | <b>Occupancy</b> | <b>Atom</b> | <b>Occupancy</b> |
|-------------|------------------|-------------|------------------|-------------|------------------|-------------|------------------|
| N1          | 0.560(6)         | H1D         | 0.560(6)         | N11         | 0.440(6)         | H11D        | 0.440(6)         |
| H1A         | 0.560(6)         | C2          | 0.560(6)         | H11A        | 0.440(6)         | C12         | 0.440(6)         |
| H1B         | 0.560(6)         | H2A         | 0.560(6)         | H11B        | 0.440(6)         | H12A        | 0.440(6)         |
| N2          | 0.560(6)         | H2B         | 0.560(6)         | N12         | 0.440(6)         | H12B        | 0.440(6)         |
| H2          | 0.560(6)         | C3          | 0.560(6)         | H12         | 0.440(6)         | C13         | 0.440(6)         |
| N3          | 0.560(6)         | H3C         | 0.560(6)         | N13         | 0.440(6)         | H13C        | 0.440(6)         |
| H3A         | 0.560(6)         | H3D         | 0.560(6)         | H13A        | 0.440(6)         | H13D        | 0.440(6)         |
| H3B         | 0.560(6)         | C4          | 0.560(6)         | H13B        | 0.440(6)         | C14         | 0.440(6)         |
| C1          | 0.560(6)         | H4A         | 0.560(6)         | C11         | 0.440(6)         | H14A        | 0.440(6)         |
| H1C         | 0.560(6)         | H4B         | 0.560(6)         | H11C        | 0.440(6)         | H14B        | 0.440(6)         |



## Compound 3

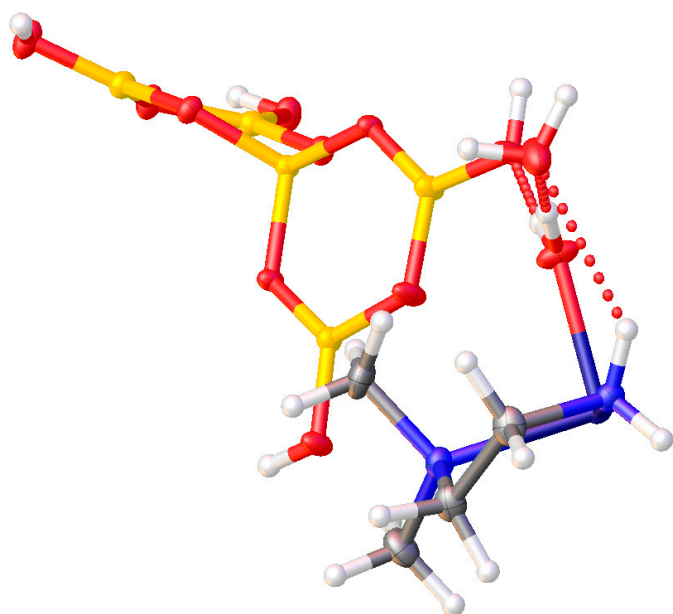

**Crystal Data.**  $C_8H_{40}B_{10}N_4NiO_{24}$ ,  $M_r = 743.25$ , triclinic,  $P-1$  (No. 2),  $a = 8.6570(3) \text{ \AA}$ ,  $b = 9.7443(3) \text{ \AA}$ ,  $c = 10.2101(3) \text{ \AA}$ ,  $\alpha = 107.087(3)^\circ$ ,  $\beta = 102.747(3)^\circ$ ,  $\gamma = 95.002(3)^\circ$ ,  $V = 792.23(5) \text{ \AA}^3$ ,  $T = 100(2) \text{ K}$ ,  $Z = 1$ ,  $Z' = 0.5$ ,  $\mu(\text{Mo } K\alpha) = 0.708$ , 12978 reflections measured, 3628 unique ( $R_{\text{int}} = 0.0163$ ) which were used in all calculations. The final  $wR_2$  was 0.0731 (all data) and  $R_1$  was 0.0270 ( $I \geq 2 \sigma(I)$ ).

| Compound                              | MAB3                           |
|---------------------------------------|--------------------------------|
| Formula                               | $C_8H_{40}B_{10}N_4NiO_{24}$   |
| $D_{\text{calc.}} / \text{g cm}^{-3}$ | 1.558                          |
| $\mu / \text{mm}^{-1}$                | 0.708                          |
| Formula Weight                        | 743.25                         |
| Colour                                | blue                           |
| Shape                                 | block-shaped                   |
| Size/ $\text{mm}^3$                   | $0.23 \times 0.21 \times 0.08$ |
| $T / \text{K}$                        | 100(2)                         |
| Crystal System                        | triclinic                      |
| Space Group                           | $P-1$                          |
| $a / \text{\AA}$                      | 8.6570(3)                      |
| $b / \text{\AA}$                      | 9.7443(3)                      |
| $c / \text{\AA}$                      | 10.2101(3)                     |
| $\alpha / ^\circ$                     | 107.087(3)                     |
| $\beta / ^\circ$                      | 102.747(3)                     |
| $\gamma / ^\circ$                     | 95.002(3)                      |
| $V / \text{\AA}^3$                    | 792.23(5)                      |
| $Z$                                   | 1                              |
| $Z'$                                  | 0.5                            |
| Wavelength/ $\text{\AA}$              | 0.71075                        |
| Radiation type                        | Mo $K\alpha$                   |
| $\Theta_{\text{min}} / ^\circ$        | 2.216                          |
| $\Theta_{\text{max}} / ^\circ$        | 27.481                         |
| Measured Refl's.                      | 12978                          |
| Indep't Refl's                        | 3628                           |
| Refl's $I \geq 2 \sigma(I)$           | 3568                           |
| $R_{\text{int}}$                      | 0.0163                         |
| Parameters                            | 225                            |
| Restraints                            | 0                              |
| Largest Peak                          | 0.719                          |
| Deepest Hole                          | -0.510                         |
| GooF                                  | 1.088                          |
| $wR_2$ (all data)                     | 0.0731                         |
| $wR_2$                                | 0.0730                         |
| $R_1$ (all data)                      | 0.0272                         |
| $R_1$                                 | 0.0270                         |

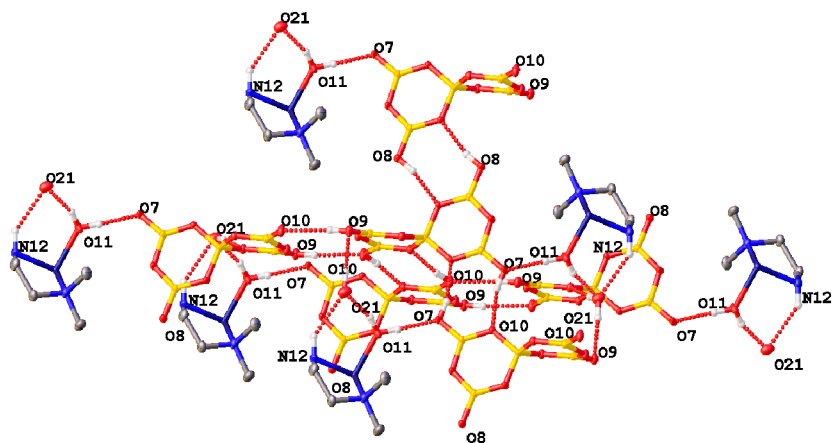

**Figure S1:** The following hydrogen bonding interactions with a maximum D-D distance of 2.9 Å and a minimum angle of 120 ° are present in **MAB3**: O11–O21: 2.675 Å, O11–O7: 2.686 Å, N12–O2\_6: 2.987 Å, N12–O21: 3.217 Å, O7–O1\_1: 2.64 Å, O8–O3\_2: 2.692 Å, O9–O10\_3: 2.837 Å, O10–O6\_4: 2.735 Å, O21–O4\_5: 2.753 Å, O21–O9\_1: 2.884 Å.

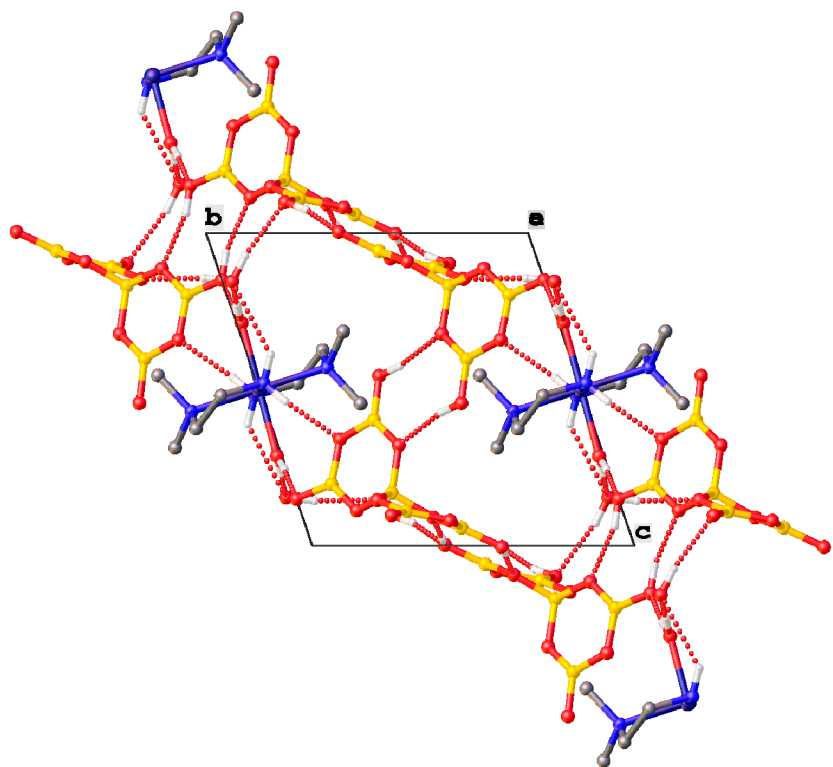

**Figure S2:** Packing diagram of MAB3.

**Table S1:** Fractional Atomic Coordinates ( $\times 10^4$ ) and Equivalent Isotropic Displacement Parameters ( $\text{\AA}^2 \times 10^3$ ) for **MAB3**.  $U_{eq}$  is defined as 1/3 of the trace of the orthogonalised  $U_{ij}$ .

| Atom | x           | y          | z          | $U_{eq}$ |
|------|-------------|------------|------------|----------|
| Ni1  | 10000       | 0          | 5000       | 10.62(9) |
| O11  | 9342.1(11)  | -151.9(11) | 2877.1(10) | 20.0(2)  |
| N11  | 10941.2(13) | 2336.8(11) | 5700.1(12) | 15.5(2)  |
| N12  | 12321.6(12) | -200.8(11) | 4807.4(11) | 14.6(2)  |
| C11  | 12684.8(15) | 2379.6(14) | 6249.3(15) | 19.1(3)  |
| C12  | 13308.9(15) | 1254.7(14) | 5200.1(15) | 20.2(3)  |
| C13  | 10661.9(17) | 2995.7(15) | 4551.1(16) | 23.3(3)  |

| Atom | x           | y          | z          | $U_{eq}$  |
|------|-------------|------------|------------|-----------|
| C14  | 10316.6(17) | 3221.3(15) | 6853.5(16) | 23.0(3)   |
| O1   | 4680.3(10)  | 1750.3(9)  | 1139.3(9)  | 11.41(17) |
| O2   | 6351.7(11)  | 1981.9(10) | 3411.1(9)  | 17.8(2)   |
| O3   | 4659.1(10)  | 3746.5(9)  | 3219.7(9)  | 12.21(17) |
| O4   | 2201.0(10)  | 2496.4(9)  | 1469.3(9)  | 12.74(18) |
| O5   | 1449.0(10)  | 4542.4(10) | 812.4(10)  | 15.17(19) |
| O6   | 4118.8(10)  | 4048.9(9)  | 915.3(9)   | 12.08(17) |
| O7   | 6367.3(12)  | 1.3(11)    | 1505.6(10) | 22.3(2)   |
| O8   | 6425.6(11)  | 3867.1(10) | 5437.1(9)  | 16.15(19) |
| O9   | -514.7(10)  | 2781.2(10) | 983.9(10)  | 16.12(19) |
| O10  | 3121.2(11)  | 5872.9(10) | -33.6(10)  | 17.65(19) |
| B1   | 3909.2(15)  | 3018.1(14) | 1686.3(13) | 10.5(2)   |
| B2   | 5768.2(16)  | 1245.3(15) | 1977.5(14) | 14.2(3)   |
| B3   | 5787.3(15)  | 3239.6(14) | 4026.6(14) | 12.0(2)   |
| B4   | 1049.8(16)  | 3285.2(14) | 1101.4(14) | 12.9(2)   |
| B5   | 2935.8(16)  | 4822.3(14) | 579.1(14)  | 13.1(2)   |
| O21  | 11696.3(13) | -301.6(11) | 1552.8(11) | 23.3(2)   |

**Table S2:** Anisotropic Displacement Parameters ( $\times 10^4$ ) for **MAB3**. The anisotropic displacement factor exponent takes the form:  $-2\pi^2[h^2a^{*2} \times U_{11} + \dots + 2hka^* \times b^* \times U_{12}]$

| Atom | $U_{11}$ | $U_{22}$  | $U_{33}$  | $U_{23}$ | $U_{13}$ | $U_{12}$ |
|------|----------|-----------|-----------|----------|----------|----------|
| Ni1  | 8.91(12) | 13.52(13) | 10.88(12) | 5.87(8)  | 2.12(8)  | 3.65(8)  |
| O11  | 14.0(4)  | 35.7(5)   | 14.4(4)   | 13.3(4)  | 3.4(3)   | 8.5(4)   |
| N11  | 13.5(5)  | 15.2(5)   | 18.6(5)   | 6.1(4)   | 4.2(4)   | 4.0(4)   |
| N12  | 12.0(5)  | 16.9(5)   | 16.0(5)   | 6.5(4)   | 3.4(4)   | 4.4(4)   |
| C11  | 12.4(6)  | 18.2(6)   | 24.1(6)   | 5.7(5)   | 1.6(5)   | 1.0(4)   |
| C12  | 11.9(5)  | 20.4(6)   | 29.1(7)   | 8.1(5)   | 7.1(5)   | 2.1(5)   |
| C13  | 23.5(7)  | 20.3(6)   | 30.8(7)   | 15.7(6)  | 5.6(6)   | 5.4(5)   |
| C14  | 21.2(6)  | 18.2(6)   | 26.0(7)   | 0.2(5)   | 7.3(5)   | 5.3(5)   |
| O1   | 12.8(4)  | 11.5(4)   | 9.0(4)    | 2.0(3)   | 1.3(3)   | 5.8(3)   |
| O2   | 21.3(5)  | 17.5(4)   | 10.4(4)   | 0.0(3)   | -1.9(3)  | 12.1(4)  |
| O3   | 14.5(4)  | 11.9(4)   | 9.1(4)    | 2.0(3)   | 0.9(3)   | 6.3(3)   |
| O4   | 11.2(4)  | 12.5(4)   | 15.5(4)   | 5.6(3)   | 3.2(3)   | 3.7(3)   |
| O5   | 12.6(4)  | 16.3(4)   | 21.4(4)   | 10.7(3)  | 5.9(3)   | 7.0(3)   |
| O6   | 11.2(4)  | 13.7(4)   | 13.7(4)   | 7.0(3)   | 3.3(3)   | 5.0(3)   |
| O7   | 25.9(5)  | 21.5(5)   | 11.5(4)   | -2.7(4)  | -5.1(4)  | 16.5(4)  |
| O8   | 19.0(4)  | 15.2(4)   | 10.9(4)   | 0.3(3)   | -0.2(3)  | 9.4(3)   |
| O9   | 12.3(4)  | 15.9(4)   | 22.7(5)   | 9.1(4)   | 4.6(3)   | 5.7(3)   |
| O10  | 13.8(4)  | 20.8(4)   | 26.3(5)   | 15.7(4)  | 8.1(4)   | 8.2(3)   |
| B1   | 10.9(6)  | 10.5(5)   | 9.8(5)    | 2.9(4)   | 1.9(4)   | 4.2(4)   |
| B2   | 14.3(6)  | 14.5(6)   | 11.8(6)   | 2.1(5)   | 0.5(5)   | 6.5(5)   |
| B3   | 11.7(6)  | 11.4(6)   | 12.3(6)   | 3.5(5)   | 1.8(5)   | 3.8(4)   |
| B4   | 13.6(6)  | 13.5(6)   | 11.5(6)   | 3.4(5)   | 3.1(5)   | 4.8(5)   |
| B5   | 12.9(6)  | 13.7(6)   | 13.7(6)   | 5.4(5)   | 2.9(5)   | 5.3(5)   |
| O21  | 31.0(5)  | 16.4(4)   | 25.1(5)   | 5.9(4)   | 13.9(4)  | 2.6(4)   |

**Table S3:** Bond Lengths in Å for **MAB3**.

| Atom | Atom             | Length/Å   |
|------|------------------|------------|
| Ni1  | O11 <sup>1</sup> | 2.0727(9)  |
| Ni1  | O11              | 2.0727(9)  |
| Ni1  | N11 <sup>1</sup> | 2.1961(11) |
| Ni1  | N11              | 2.1961(11) |
| Ni1  | N12 <sup>1</sup> | 2.0824(10) |
| Ni1  | N12              | 2.0824(10) |
| N11  | C11              | 1.4820(16) |
| N11  | C13              | 1.4804(17) |
| N11  | C14              | 1.4792(17) |
| N12  | C12              | 1.4852(16) |
| C11  | C12              | 1.5198(18) |
| O1   | B1               | 1.4787(14) |
| O1   | B2               | 1.3542(16) |
| O2   | B2               | 1.3806(15) |
| O2   | B3               | 1.3867(15) |
| O3   | B1               | 1.4814(14) |
| O3   | B3               | 1.3582(15) |
| O4   | B1               | 1.4671(15) |
| O4   | B4               | 1.3650(15) |
| O5   | B4               | 1.3751(16) |
| O5   | B5               | 1.3784(16) |
| O6   | B1               | 1.4689(15) |
| O6   | B5               | 1.3660(15) |
| O7   | B2               | 1.3591(16) |
| O8   | B3               | 1.3511(15) |
| O9   | B4               | 1.3666(16) |
| O10  | B5               | 1.3628(16) |

----

<sup>1</sup>2-x,y,1-z

**Table S4:** Bond Angles in ° for **MAB3**.

| Atom             | Atom | Atom             | Angle/°     |
|------------------|------|------------------|-------------|
| O11 <sup>1</sup> | Ni1  | O11              | 180.000(14) |
| O11              | Ni1  | N11 <sup>1</sup> | 86.65(4)    |
| O11 <sup>1</sup> | Ni1  | N11              | 86.65(4)    |
| O11 <sup>1</sup> | Ni1  | N11 <sup>1</sup> | 93.35(4)    |
| O11              | Ni1  | N11              | 93.35(4)    |
| O11 <sup>1</sup> | Ni1  | N12              | 91.73(4)    |
| O11              | Ni1  | N12 <sup>1</sup> | 91.72(4)    |
| O11              | Ni1  | N12              | 88.27(4)    |
| O11 <sup>1</sup> | Ni1  | N12 <sup>1</sup> | 88.27(4)    |
| N11              | Ni1  | N11 <sup>1</sup> | 180.0       |
| N12 <sup>1</sup> | Ni1  | N11 <sup>1</sup> | 83.00(4)    |
| N12              | Ni1  | N11 <sup>1</sup> | 97.00(4)    |
| N12 <sup>1</sup> | Ni1  | N11              | 97.00(4)    |
| N12              | Ni1  | N11              | 83.00(4)    |
| N12              | Ni1  | N12 <sup>1</sup> | 180.0       |
| C11              | N11  | Ni1              | 102.42(7)   |
| C13              | N11  | Ni1              | 114.11(8)   |
| C13              | N11  | C11              | 110.00(10)  |
| C14              | N11  | Ni1              | 113.87(8)   |
| C14              | N11  | C11              | 108.98(10)  |
| C14              | N11  | C13              | 107.30(11)  |
| C12              | N12  | Ni1              | 110.67(8)   |
| N11              | C11  | C12              | 110.67(11)  |
| N12              | C12  | C11              | 110.15(10)  |
| B2               | O1   | B1               | 123.62(9)   |
| B2               | O2   | B3               | 120.01(10)  |
| B3               | O3   | B1               | 124.54(9)   |
| B4               | O4   | B1               | 121.42(10)  |
| B4               | O5   | B5               | 118.86(10)  |
| B5               | O6   | B1               | 120.90(9)   |
| O1               | B1   | O3               | 110.16(9)   |
| O4               | B1   | O1               | 108.23(9)   |
| O4               | B1   | O3               | 109.48(9)   |
| O4               | B1   | O6               | 110.86(9)   |
| O6               | B1   | O1               | 108.85(9)   |
| O6               | B1   | O3               | 109.26(9)   |
| O1               | B2   | O2               | 121.23(11)  |
| O1               | B2   | O7               | 124.09(11)  |
| O7               | B2   | O2               | 114.68(11)  |
| O3               | B3   | O2               | 120.02(11)  |
| O8               | B3   | O2               | 115.23(11)  |
| O8               | B3   | O3               | 124.75(11)  |
| O4               | B4   | O5               | 120.65(11)  |
| O4               | B4   | O9               | 118.84(11)  |
| O9               | B4   | O5               | 120.48(11)  |
| O6               | B5   | O5               | 120.91(11)  |
| O10              | B5   | O5               | 116.02(11)  |
| O10              | B5   | O6               | 123.05(11)  |

----

<sup>1</sup>2-x,y,1-z

**Table S5:** Torsion Angles in ° for **MAB3**.

| Atom | Atom | Atom | Atom | Angle/°     |
|------|------|------|------|-------------|
| Ni1  | N11  | C11  | C12  | 47.76(11)   |
| Ni1  | N12  | C12  | C11  | 27.28(13)   |
| N11  | C11  | C12  | N12  | -52.60(14)  |
| C13  | N11  | C11  | C12  | -73.93(13)  |
| C14  | N11  | C11  | C12  | 168.69(11)  |
| B1   | O1   | B2   | O2   | -6.39(19)   |
| B1   | O1   | B2   | O7   | 173.33(12)  |
| B1   | O3   | B3   | O2   | 2.18(18)    |
| B1   | O3   | B3   | O8   | -177.09(11) |
| B1   | O4   | B4   | O5   | 5.22(17)    |
| B1   | O4   | B4   | O9   | -176.71(10) |
| B1   | O6   | B5   | O5   | -7.24(17)   |
| B1   | O6   | B5   | O10  | 174.64(11)  |
| B2   | O1   | B1   | O3   | 7.66(15)    |
| B2   | O1   | B1   | O4   | -112.00(12) |
| B2   | O1   | B1   | O6   | 127.43(12)  |
| B2   | O2   | B3   | O3   | 0.07(18)    |
| B2   | O2   | B3   | O8   | 179.40(11)  |
| B3   | O2   | B2   | O1   | 2.01(19)    |
| B3   | O2   | B2   | O7   | -177.73(12) |
| B3   | O3   | B1   | O1   | -5.61(15)   |
| B3   | O3   | B1   | O4   | 113.29(12)  |
| B3   | O3   | B1   | O6   | -125.14(11) |
| B4   | O4   | B1   | O1   | -142.95(10) |
| B4   | O4   | B1   | O3   | 96.95(12)   |
| B4   | O4   | B1   | O6   | -23.65(14)  |
| B4   | O5   | B5   | O6   | -13.70(17)  |
| B4   | O5   | B5   | O10  | 164.55(11)  |
| B5   | O5   | B4   | O4   | 14.72(17)   |
| B5   | O5   | B4   | O9   | -163.32(11) |
| B5   | O6   | B1   | O1   | 143.50(10)  |
| B5   | O6   | B1   | O3   | -96.16(12)  |
| B5   | O6   | B1   | O4   | 24.57(14)   |

**Table S6:** Hydrogen Fractional Atomic Coordinates ( $\times 10^4$ ) and Equivalent Isotropic Displacement Parameters ( $\text{\AA}^2 \times 10^3$ ) for **MAB3**.  $U_{eq}$  is defined as 1/3 of the trace of the orthogonalised  $U_{ij}$ .

| Atom | x        | y       | z       | $U_{eq}$ |
|------|----------|---------|---------|----------|
| H11A | 9963.13  | -203.67 | 2304.13 | 30       |
| H11B | 8382.52  | -63.39  | 2451.62 | 30       |
| H12A | 12781.76 | -692.52 | 5382.22 | 18       |
| H12B | 12284.25 | -720.28 | 3897.44 | 18       |
| H11C | 12885.34 | 2183.81 | 7165.2  | 23       |
| H11D | 13266.99 | 3361.58 | 6417.76 | 23       |
| H12C | 13268.19 | 1536.57 | 4338.7  | 24       |
| H12D | 14440.68 | 1216.03 | 5629.12 | 24       |
| H13A | 9505.57  | 2939.22 | 4176.71 | 35       |
| H13B | 11116.19 | 2466.95 | 3788.95 | 35       |
| H13C | 11179.11 | 4017.14 | 4926.93 | 35       |
| H14A | 10444.29 | 2791.79 | 7618.94 | 35       |
| H14B | 9176.61  | 3242.99 | 6484.8  | 35       |
| H14C | 10914.99 | 4215.3  | 7220.9  | 35       |
| H7   | 5932.79  | -405.51 | 636.78  | 33       |
| H8   | 5994.01  | 4595.5  | 5735.34 | 24       |
| H9   | -1100.02 | 3355.23 | 742.63  | 24       |
| H10  | 4007.75  | 5887.86 | -240.94 | 26       |
| H21A | 11861.96 | 548.62  | 1447.08 | 35       |
| H21B | 11452.37 | -974.08 | 727.68  | 35       |

**Table S7:** Hydrogen Bond information for **MAB3**.

| <b>D</b> | <b>H</b> | <b>A</b>         | <b>d(D-H)/Å</b> | <b>d(H-A)/Å</b> | <b>d(D-A)/Å</b> | <b>D-H-A/deg</b> |
|----------|----------|------------------|-----------------|-----------------|-----------------|------------------|
| O11      | H11A     | O21              | 0.87            | 1.83            | 2.6749(14)      | 163.6            |
| O11      | H11B     | O7               | 0.87            | 1.81            | 2.6859(13)      | 176.5            |
| N12      | H12A     | O2 <sup>1</sup>  | 0.91            | 2.08            | 2.9867(14)      | 174.4            |
| N12      | H12B     | O21              | 0.91            | 2.50            | 3.2172(15)      | 136.5            |
| O7       | H7       | O1 <sup>2</sup>  | 0.84            | 1.83            | 2.6399(12)      | 161.8            |
| O8       | H8       | O3 <sup>3</sup>  | 0.84            | 1.87            | 2.6917(12)      | 167.4            |
| O9       | H9       | O10 <sup>4</sup> | 0.84            | 2.04            | 2.8373(12)      | 159.5            |
| O10      | H10      | O6 <sup>5</sup>  | 0.84            | 1.90            | 2.7354(12)      | 173.2            |
| O21      | H21A     | O4 <sup>6</sup>  | 0.87            | 1.89            | 2.7526(13)      | 172.3            |
| O21      | H21B     | O9 <sup>2</sup>  | 0.87            | 2.03            | 2.8836(14)      | 165.8            |

-----  
<sup>1</sup>2-x,-y,1-z; <sup>2</sup>1-x,-y,-z; <sup>3</sup>1-x,1-y,1-z; <sup>4</sup>-x,1-y,-z; <sup>5</sup>1-x,1-y,-z; <sup>6</sup>1+x,+y,+z



## Compound 4

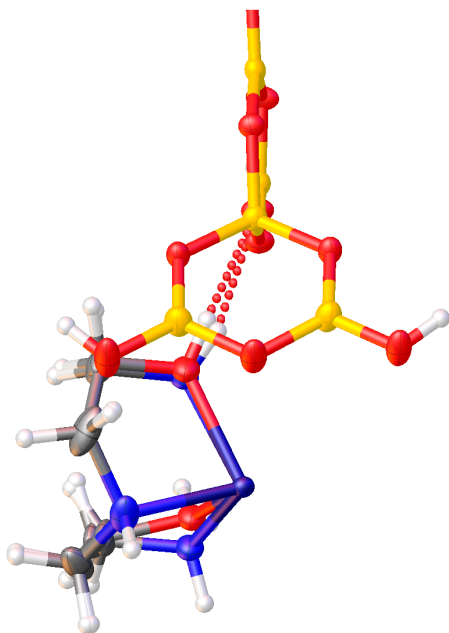

**Crystal Data.**  $\text{C}_8\text{H}_{32}\text{B}_{10}\text{N}_4\text{NiO}_{22}$ ,  $M_r = 703.18$ , monoclinic,  $P2_1/c$  (No. 14),  $a = 8.3891(2) \text{ \AA}$ ,  $b = 11.6666(3) \text{ \AA}$ ,  $c = 14.3092(4) \text{ \AA}$ ,  $\beta = 90.035(2)^\circ$ ,  $\alpha = \gamma = 90^\circ$ ,  $V = 1400.47(6) \text{ \AA}^3$ ,  $T = 100(2) \text{ K}$ ,  $Z = 2$ ,  $Z' = 0.5$ ,  $\mu(\text{Mo K}\alpha) = 0.791$ , 6239 reflections measured, 6239 unique ( $R_{\text{int}} = .$ ) which were used in all calculations. The final  $wR_2$  was 0.1124 (all data) and  $R_1$  was 0.0499 ( $I \geq 2 \sigma(I)$ ).

| Compound                              | MAB4                                                            |
|---------------------------------------|-----------------------------------------------------------------|
| Formula                               | $\text{C}_8\text{H}_{32}\text{B}_{10}\text{N}_4\text{NiO}_{22}$ |
| $D_{\text{calc.}} / \text{g cm}^{-3}$ | 1.668                                                           |
| $\mu / \text{mm}^{-1}$                | 0.791                                                           |
| Formula Weight                        | 703.18                                                          |
| Colour                                | Lilac                                                           |
| Shape                                 | rod-shaped                                                      |
| Size/ $\text{mm}^3$                   | $0.34 \times 0.05 \times 0.04$                                  |
| $T / \text{K}$                        | 100(2)                                                          |
| Crystal System                        | monoclinic                                                      |
| Space Group                           | $P2_1/c$                                                        |
| $a / \text{\AA}$                      | 8.3891(2)                                                       |
| $b / \text{\AA}$                      | 11.6666(3)                                                      |
| $c / \text{\AA}$                      | 14.3092(4)                                                      |
| $\alpha / ^\circ$                     | 90                                                              |
| $\beta / ^\circ$                      | 90.035(2)                                                       |
| $\gamma / ^\circ$                     | 90                                                              |
| $V / \text{\AA}^3$                    | 1400.47(6)                                                      |
| $Z$                                   | 2                                                               |
| $Z'$                                  | 0.5                                                             |
| Wavelength/ $\text{\AA}$              | 0.71075                                                         |
| Radiation type                        | Mo $\text{K}\alpha$                                             |
| $\Theta_{\text{min}} / ^\circ$        | 2.252                                                           |
| $\Theta_{\text{max}} / ^\circ$        | 27.496                                                          |
| Measured Refl's.                      | 6239                                                            |
| Indep't Refl's                        | 6239                                                            |
| Refl's $I \geq 2 \sigma(I)$           | 5795                                                            |
| $R_{\text{int}}$                      | .                                                               |
| Parameters                            | 223                                                             |
| Restraints                            | 13                                                              |
| Largest Peak                          | 0.961                                                           |
| Deepest Hole                          | -0.466                                                          |
| GooF                                  | 1.126                                                           |
| $wR_2$ (all data)                     | 0.1124                                                          |
| $wR_2$                                | 0.1103                                                          |
| $R_1$ (all data)                      | 0.0542                                                          |
| $R_1$                                 | 0.0499                                                          |

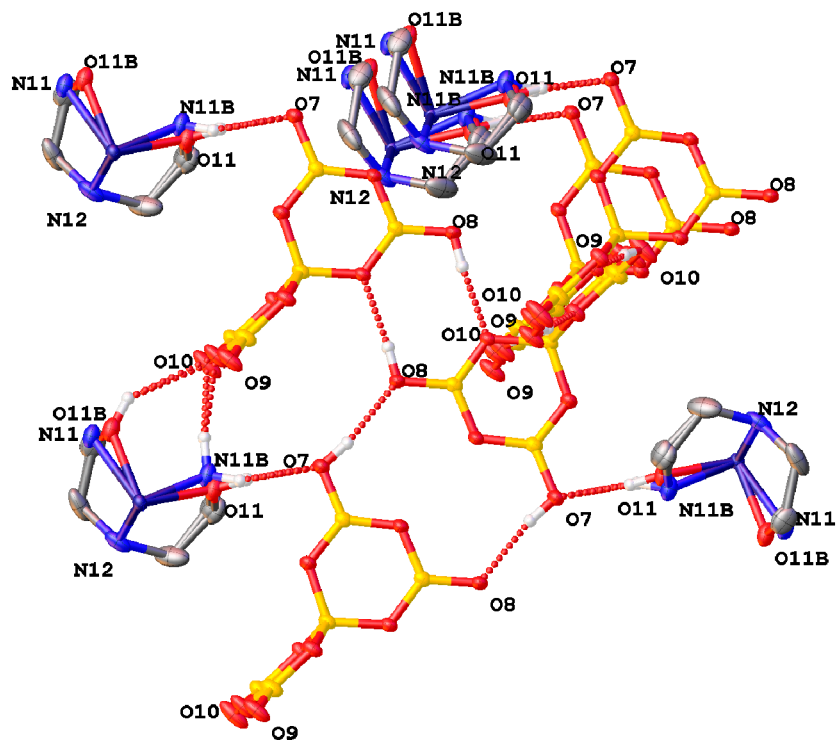

**Figure S1:** The following hydrogen bonding interactions with a maximum D-D distance of 2.9 Å and a minimum angle of 120 ° are present in **MAB4**: O7-H8\_1: 2.804 Å, O8-H3\_2: 2.678 Å, O9-H6\_3: 2.74 Å, O10-H4\_4: 2.726 Å, N12-H9\_6: 2.973 Å, N11-H1\_7: 2.975 Å, O11-H7: 2.77 Å, N11B-H7: 2.867 Å, N11B-H5\_5: 2.981 Å, N11B-H10\_5: 3.0 Å, O11B-H5\_5: 3.125 Å, O11B-H10\_5: 3.22 Å.

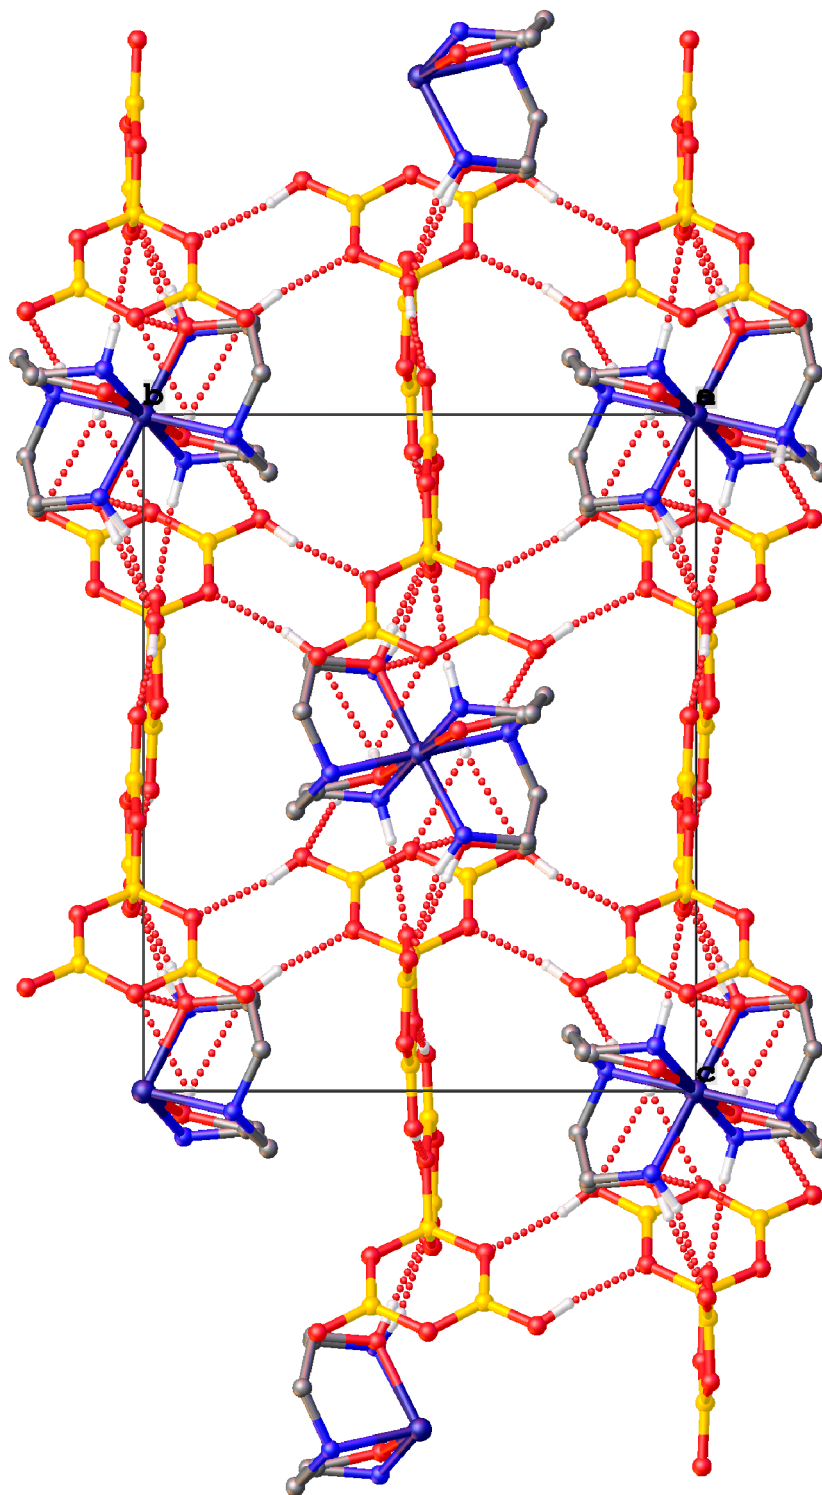

**Figure S2:** Packing diagram of MAB4.

**Table S1:** Fractional Atomic Coordinates ( $\times 10^4$ ) and Equivalent Isotropic Displacement Parameters ( $\text{\AA}^2 \times 10^3$ ) for **MAB4**.  $U_{eq}$  is defined as 1/3 of the trace of the orthogonalised  $U_{ij}$ .

| Atom | x       | y          | z          | $U_{eq}$ |
|------|---------|------------|------------|----------|
| O1   | 2069(2) | 4775.4(16) | 2290.8(12) | 17.5(4)  |
| O2   | 1197(2) | 4735.0(16) | 707.2(12)  | 19.1(4)  |
| O3   | 3970(2) | 4881.8(15) | 1011.7(12) | 15.6(4)  |
| O4   | 4592(2) | 3814.3(14) | 2387.3(12) | 17.2(4)  |

| Atom | x         | y          | z          | $U_{eq}$  |
|------|-----------|------------|------------|-----------|
| O5   | 6001(3)   | 4853.2(17) | 3555.7(15) | 28.1(5)   |
| O6   | 4459(2)   | 5882.9(15) | 2438.3(13) | 18.4(4)   |
| O7   | -660(2)   | 4801.1(17) | 1948.2(13) | 19.6(4)   |
| O8   | 2956(2)   | 4885.7(17) | -546.1(12) | 19.6(4)   |
| O9   | 6318(3)   | 2877.4(17) | 3464.2(15) | 28.2(5)   |
| O10  | 6038(3)   | 6847.3(18) | 3571.9(17) | 36.9(6)   |
| B1   | 3756(3)   | 4839(2)    | 2033(2)    | 16.0(5)   |
| B2   | 888(3)    | 4770(2)    | 1651(2)    | 15.1(5)   |
| B3   | 2737(3)   | 4833(2)    | 397(2)     | 14.8(5)   |
| B4   | 5617(4)   | 3837(3)    | 3117(2)    | 22.2(6)   |
| B5   | 5474(4)   | 5878(3)    | 3172(2)    | 23.8(6)   |
| Ni1  | 0         | 5000       | 5000       | 14.33(13) |
| N12  | 920(3)    | 6614(2)    | 5300.4(19) | 29.9(6)   |
| C12  | -259(5)   | 7258(3)    | 5845(2)    | 41.7(9)   |
| C13  | 1397(4)   | 7131(3)    | 4383(3)    | 43.1(9)   |
| C11  | -1975(15) | 7020(20)   | 5580(40)   | 30.3(17)  |
| C14  | 210(40)   | 6930(30)   | 3620(20)   | 31(3)     |
| N11  | -2045(9)  | 5727(4)    | 5671(6)    | 24.6(5)   |
| O11  | -306(7)   | 5780(5)    | 3700(6)    | 24.6(5)   |
| C11B | -1910(20) | 6870(30)   | 5560(60)   | 30.3(17)  |
| C14B | 80(70)    | 6940(40)   | 3690(40)   | 31(3)     |
| N11B | -718(14)  | 5795(9)    | 3780(12)   | 24.6(5)   |
| O11B | -2196(11) | 5700(5)    | 5338(6)    | 24.6(5)   |

**Table S2:** Anisotropic Displacement Parameters ( $\times 10^4$ ) for **MAB4**. The anisotropic displacement factor exponent takes the form:  $-2\pi^2[h^2a^{*2} \times U_{11} + \dots + 2hka^* \times b^* \times U_{12}]$

| Atom | $U_{11}$ | $U_{22}$ | $U_{33}$ | $U_{23}$  | $U_{13}$  | $U_{12}$  |
|------|----------|----------|----------|-----------|-----------|-----------|
| O1   | 13.5(9)  | 23.9(9)  | 15.1(8)  | 0.9(7)    | -2.7(6)   | 1.4(7)    |
| O2   | 12.0(9)  | 29.9(10) | 15.3(9)  | -1.5(7)   | -3.0(6)   | -2.3(7)   |
| O3   | 11.8(8)  | 19.0(9)  | 15.9(8)  | 0.2(7)    | -2.9(6)   | -0.7(7)   |
| O4   | 15.8(9)  | 15.7(8)  | 20.0(9)  | 0.5(7)    | -7.0(7)   | 0.2(7)    |
| O5   | 34.5(12) | 19.2(10) | 30.7(11) | 1.0(8)    | -22.4(9)  | 0.0(8)    |
| O6   | 20.9(9)  | 15.1(8)  | 19.1(9)  | -0.6(7)   | -7.7(7)   | 0.6(7)    |
| O7   | 14.0(9)  | 29.2(10) | 15.4(8)  | 0.8(7)    | -2.8(7)   | -0.1(7)   |
| O8   | 10.6(8)  | 32.0(10) | 16.3(9)  | -1.2(8)   | -1.7(7)   | 0.3(8)    |
| O9   | 31.7(11) | 17.9(9)  | 35.0(12) | 2.0(8)    | -22.0(9)  | -0.9(8)   |
| O10  | 50.0(15) | 18.7(10) | 41.8(13) | -0.4(9)   | -32.7(11) | -0.7(10)  |
| B1   | 13.2(13) | 16.9(13) | 17.8(13) | 1.2(10)   | -4.4(10)  | 0.6(10)   |
| B2   | 15.3(13) | 12.8(12) | 17.1(13) | 0.4(10)   | -2.3(10)  | -0.3(10)  |
| B3   | 14.3(13) | 12.3(12) | 17.7(13) | -1.0(10)  | -2.4(10)  | 1.4(10)   |
| B4   | 20.5(15) | 19.6(14) | 26.3(16) | 3.0(11)   | -9.1(12)  | -1.2(11)  |
| B5   | 24.4(16) | 21.8(15) | 25.1(16) | -0.8(12)  | -10.0(12) | -0.8(12)  |
| Ni1  | 16.0(2)  | 14.7(2)  | 12.2(2)  | 0.52(17)  | -1.39(15) | 1.14(17)  |
| N12  | 29.0(14) | 23.6(12) | 37.2(14) | 1.9(10)   | -19.7(11) | -0.6(10)  |
| C12  | 64(2)    | 30.6(16) | 30.2(17) | -10.3(13) | -24.2(16) | 16.1(16)  |
| C13  | 28.8(17) | 32.5(17) | 68(3)    | 23.0(17)  | -9.2(16)  | -10.1(14) |
| C11  | 40(2)    | 14(6)    | 37(3)    | 1(6)      | 12(3)     | 11(2)     |
| C14  | 40(5)    | 25.0(16) | 28(5)    | 9(2)      | 11(5)     | 3(3)      |
| N11  | 32.9(18) | 22.2(8)  | 18.7(17) | -0.4(9)   | 6(2)      | 1.1(10)   |
| O11  | 32.9(18) | 22.2(8)  | 18.7(17) | -0.4(9)   | 6(2)      | 1.1(10)   |
| C11B | 40(2)    | 14(6)    | 37(3)    | 1(6)      | 12(3)     | 11(2)     |
| C14B | 40(5)    | 25.0(16) | 28(5)    | 9(2)      | 11(5)     | 3(3)      |
| N11B | 32.9(18) | 22.2(8)  | 18.7(17) | -0.4(9)   | 6(2)      | 1.1(10)   |
| O11B | 32.9(18) | 22.2(8)  | 18.7(17) | -0.4(9)   | 6(2)      | 1.1(10)   |

**Table S3:** Bond Lengths in Å for **MAB4**.

| Atom | Atom             | Length/Å |
|------|------------------|----------|
| O1   | B1               | 1.465(3) |
| O1   | B2               | 1.348(3) |
| O2   | B2               | 1.377(3) |
| O2   | B3               | 1.371(3) |
| O3   | B1               | 1.473(3) |
| O3   | B3               | 1.359(3) |
| O4   | B1               | 1.475(3) |
| O4   | B4               | 1.352(3) |
| O5   | B4               | 1.380(4) |
| O5   | B5               | 1.388(4) |
| O6   | B1               | 1.472(3) |
| O6   | B5               | 1.351(4) |
| O7   | B2               | 1.366(3) |
| O8   | B3               | 1.364(3) |
| O9   | B4               | 1.359(4) |
| O10  | B5               | 1.353(4) |
| Ni1  | N12 <sup>1</sup> | 2.079(2) |
| Ni1  | N12              | 2.079(2) |
| Ni1  | N11              | 2.142(7) |

| Atom                    | Atom              | Length/Å  |
|-------------------------|-------------------|-----------|
| Ni1                     | N11 <sup>1</sup>  | 2.142(7)  |
| Ni1                     | O11 <sup>1</sup>  | 2.087(8)  |
| Ni1                     | O11               | 2.087(8)  |
| Ni1                     | N11B <sup>1</sup> | 2.066(16) |
| Ni1                     | N11B              | 2.066(16) |
| Ni1                     | O11B              | 2.072(9)  |
| Ni1                     | O11B <sup>1</sup> | 2.072(9)  |
| N12                     | C12               | 1.467(5)  |
| N12                     | C13               | 1.500(4)  |
| C12                     | C11               | 1.513(8)  |
| C12                     | C11B              | 1.512(10) |
| C13                     | C14               | 1.493(8)  |
| C13                     | C14B              | 1.496(10) |
| C11                     | N11               | 1.51(3)   |
| C14                     | O11               | 1.41(2)   |
| C11B                    | O11B              | 1.42(3)   |
| C14B                    | N11B              | 1.50(3)   |
| ----                    |                   |           |
| <sup>1</sup> -x,1-y,1-z |                   |           |

**Table S4:** Bond Angles in ° for **MAB4**.

| Atom             | Atom | Atom             | Angle/°   |
|------------------|------|------------------|-----------|
| B2               | O1   | B1               | 122.6(2)  |
| B3               | O2   | B2               | 119.6(2)  |
| B3               | O3   | B1               | 123.2(2)  |
| B4               | O4   | B1               | 123.5(2)  |
| B4               | O5   | B5               | 119.1(2)  |
| B5               | O6   | B1               | 123.7(2)  |
| O1               | B1   | O3               | 111.7(2)  |
| O1               | B1   | O4               | 109.4(2)  |
| O1               | B1   | O6               | 109.2(2)  |
| O3               | B1   | O4               | 108.1(2)  |
| O6               | B1   | O3               | 108.3(2)  |
| O6               | B1   | O4               | 110.2(2)  |
| O1               | B2   | O2               | 121.8(2)  |
| O1               | B2   | O7               | 119.1(2)  |
| O7               | B2   | O2               | 119.0(2)  |
| O3               | B3   | O2               | 120.7(2)  |
| O3               | B3   | O8               | 122.4(2)  |
| O8               | B3   | O2               | 116.8(2)  |
| O4               | B4   | O5               | 121.1(2)  |
| O4               | B4   | O9               | 122.8(3)  |
| O9               | B4   | O5               | 116.1(2)  |
| O6               | B5   | O5               | 120.8(3)  |
| O6               | B5   | O10              | 123.0(3)  |
| O10              | B5   | O5               | 116.2(3)  |
| N12              | Ni1  | N12 <sup>1</sup> | 180.0     |
| N12              | Ni1  | N11              | 81.13(17) |
| N12 <sup>1</sup> | Ni1  | N11 <sup>1</sup> | 81.13(17) |
| N12 <sup>1</sup> | Ni1  | N11              | 98.87(17) |
| N12              | Ni1  | N11 <sup>1</sup> | 98.87(17) |
| N12              | Ni1  | O11              | 80.52(19) |
| N12              | Ni1  | O11 <sup>1</sup> | 99.49(19) |
| N12 <sup>1</sup> | Ni1  | O11 <sup>1</sup> | 80.51(19) |
| N12 <sup>1</sup> | Ni1  | O11              | 99.49(19) |

| Atom                    | Atom | Atom              | Angle/°   |
|-------------------------|------|-------------------|-----------|
| N11                     | Ni1  | N11 <sup>1</sup>  | 180.0     |
| O11 <sup>1</sup>        | Ni1  | N11               | 82.6(3)   |
| O11                     | Ni1  | N11               | 97.4(3)   |
| O11                     | Ni1  | N11 <sup>1</sup>  | 82.6(3)   |
| O11 <sup>1</sup>        | Ni1  | N11 <sup>1</sup>  | 97.4(3)   |
| O11                     | Ni1  | O11 <sup>1</sup>  | 180.0(3)  |
| N11B                    | Ni1  | N12               | 82.9(4)   |
| N11B <sup>1</sup>       | Ni1  | N12               | 97.1(4)   |
| N11B <sup>1</sup>       | Ni1  | N11B              | 180.0     |
| N11B                    | Ni1  | O11B <sup>1</sup> | 103.8(5)  |
| N11B <sup>1</sup>       | Ni1  | O11B              | 103.8(5)  |
| N11B                    | Ni1  | O11B              | 76.2(5)   |
| N11B <sup>1</sup>       | Ni1  | O11B <sup>1</sup> | 76.2(5)   |
| O11B <sup>1</sup>       | Ni1  | N12               | 94.3(2)   |
| O11B                    | Ni1  | N12               | 85.7(2)   |
| O11B                    | Ni1  | O11B <sup>1</sup> | 180.0     |
| C12                     | N12  | Ni1               | 108.9(2)  |
| C12                     | N12  | C13               | 116.0(3)  |
| C13                     | N12  | Ni1               | 106.4(2)  |
| N12                     | C12  | C11               | 114.5(12) |
| N12                     | C12  | C11B              | 108.9(19) |
| C14                     | C13  | N12               | 113.3(14) |
| C14B                    | C13  | N12               | 109(2)    |
| N11                     | C11  | C12               | 101.7(14) |
| O11                     | C14  | C13               | 107.4(14) |
| C11                     | N11  | Ni1               | 109.1(13) |
| C14                     | O11  | Ni1               | 116.5(10) |
| O11B                    | C11B | C12               | 120.1(19) |
| C13                     | C14B | N11B              | 114(2)    |
| C14B                    | N11B | Ni1               | 109.9(13) |
| C11B                    | O11B | Ni1               | 106.3(13) |
| ----                    |      |                   |           |
| <sup>1</sup> -x,1-y,1-z |      |                   |           |

**Table S5:** Torsion Angles in ° for **MAB4**.

| Atom | Atom | Atom | Atom | Angle/°   |
|------|------|------|------|-----------|
| B1   | O1   | B2   | O2   | 5.0(4)    |
| B1   | O1   | B2   | O7   | -174.8(2) |
| B1   | O3   | B3   | O2   | -0.2(4)   |
| B1   | O3   | B3   | O8   | 179.3(2)  |
| B1   | O4   | B4   | O5   | -2.9(4)   |
| B1   | O4   | B4   | O9   | 176.7(3)  |
| B1   | O6   | B5   | O5   | 4.2(5)    |
| B1   | O6   | B5   | O10  | -176.0(3) |
| B2   | O1   | B1   | O3   | -0.6(3)   |
| B2   | O1   | B1   | O4   | -120.2(2) |
| B2   | O1   | B1   | O6   | 119.2(2)  |
| B2   | O2   | B3   | O3   | 4.7(3)    |
| B2   | O2   | B3   | O8   | -174.8(2) |
| B3   | O2   | B2   | O1   | -7.1(4)   |
| B3   | O2   | B2   | O7   | 172.7(2)  |
| B3   | O3   | B1   | O1   | -1.8(3)   |
| B3   | O3   | B1   | O4   | 118.5(2)  |
| B3   | O3   | B1   | O6   | -122.2(2) |
| B4   | O4   | B1   | O1   | -107.6(3) |
| B4   | O4   | B1   | O3   | 130.6(3)  |
| B4   | O4   | B1   | O6   | 12.5(4)   |
| B4   | O5   | B5   | O6   | 7.1(5)    |
| B4   | O5   | B5   | O10  | -172.7(3) |
| B5   | O5   | B4   | O4   | -7.7(4)   |
| B5   | O5   | B4   | O9   | 172.7(3)  |
| B5   | O6   | B1   | O1   | 107.0(3)  |
| B5   | O6   | B1   | O3   | -131.2(3) |
| B5   | O6   | B1   | O4   | -13.2(4)  |
| Ni1  | N12  | C12  | C11  | -35(2)    |
| Ni1  | N12  | C12  | C11B | -31(3)    |
| Ni1  | N12  | C13  | C14  | 42.0(19)  |
| Ni1  | N12  | C13  | C14B | 46(3)     |
| N12  | C12  | C11  | N11  | 54(3)     |
| N12  | C12  | C11B | O11B | 36(7)     |
| N12  | C13  | C14  | O11  | -42(4)    |
| N12  | C13  | C14B | N11B | -38(6)    |
| C12  | N12  | C13  | C14  | -79.3(19) |
| C12  | N12  | C13  | C14B | -76(3)    |
| C12  | C11  | N11  | Ni1  | -46(3)    |
| C12  | C11B | O11B | Ni1  | -21(7)    |
| C13  | N12  | C12  | C11  | 85(2)     |
| C13  | N12  | C12  | C11B | 89(3)     |
| C13  | C14  | O11  | Ni1  | 21(4)     |
| C13  | C14B | N11B | Ni1  | 11(6)     |

**Table S6:** Hydrogen Fractional Atomic Coordinates ( $\times 10^4$ ) and Equivalent Isotropic Displacement Parameters ( $\text{\AA}^2 \times 10^3$ ) for **MAB4**.  $U_{eq}$  is defined as 1/3 of the trace of the orthogonalised  $U_{ij}$ .

| Atom | x        | y       | z       | $U_{eq}$ |
|------|----------|---------|---------|----------|
| H7   | -1269.14 | 4840.12 | 1483.28 | 29       |
| H8   | 3935.21  | 4922.36 | -664.07 | 29       |
| H9   | 6056.3   | 2309.38 | 3137.68 | 42       |
| H10  | 5851.76  | 7408.45 | 3220.66 | 55       |
| H12  | 1899.41  | 6515.16 | 5690.99 | 36       |
| H12A | -53.19   | 8087.06 | 5761.67 | 50       |
| H12B | -108.32  | 7076.99 | 6514.8  | 50       |

| Atom | x         | y        | z        | $U_{eq}$ |
|------|-----------|----------|----------|----------|
| H12C | -139.03   | 8088.82  | 5723.93  | 50       |
| H12D | -91.91    | 7120.57  | 6520.31  | 50       |
| H13A | 1537.01   | 7967.82  | 4465.4   | 52       |
| H13B | 2436.97   | 6807.4   | 4191.12  | 52       |
| H13C | 1592.93   | 7962.7   | 4460.43  | 52       |
| H13D | 2391.23   | 6769.7   | 4155.76  | 52       |
| H11A | -2723.68  | 7391.81  | 6021.96  | 36       |
| H11B | -2213.12  | 7267.64  | 4938.83  | 36       |
| H14A | -703.21   | 7456.73  | 3688.41  | 37       |
| H14B | 709.14    | 7057     | 3003.76  | 37       |
| H11C | -2950.7   | 5459.01  | 5398.11  | 30       |
| H11D | -2058.29  | 5523.87  | 6285.11  | 30       |
| H11  | -500(70)  | 5490(30) | 3159(14) | 37       |
| H11E | -2642     | 7074.64  | 6079.87  | 36       |
| H11F | -2233.06  | 7331.85  | 5015.12  | 36       |
| H14C | 526.31    | 7016.24  | 3052.25  | 37       |
| H14D | -725.73   | 7552.22  | 3771.67  | 37       |
| H11G | -459.16   | 5348.29  | 3280.68  | 30       |
| H11H | -1794.3   | 5889.1   | 3784.24  | 30       |
| H11I | -3060(50) | 5830(80) | 5010(30) | 37       |

**Table S7:** Hydrogen Bond information for **MAB4**.

| D    | H    | A                | d(D-H)/Å  | d(H-A)/Å  | d(D-A)/Å  | D-H-A/deg |
|------|------|------------------|-----------|-----------|-----------|-----------|
| O7   | H7   | O8 <sup>1</sup>  | 0.84      | 1.97      | 2.804(2)  | 169.1     |
| O8   | H8   | O3 <sup>2</sup>  | 0.84      | 1.84      | 2.678(3)  | 174.1     |
| O9   | H9   | O6 <sup>3</sup>  | 0.84      | 1.91      | 2.740(3)  | 171.2     |
| O10  | H10  | O4 <sup>4</sup>  | 0.84      | 1.89      | 2.726(3)  | 170.6     |
| N12  | H12  | O9 <sup>5</sup>  | 1.00      | 2.05      | 2.973(3)  | 152.8     |
| N11  | H11D | O1 <sup>6</sup>  | 0.91      | 2.07      | 2.975(8)  | 174.6     |
| O11  | H11  | O7               | 0.861(13) | 1.913(18) | 2.770(9)  | 173(6)    |
| N11B | H11G | O7               | 0.91      | 2.02      | 2.866(17) | 154.5     |
| N11B | H11H | O5 <sup>7</sup>  | 0.91      | 2.23      | 2.981(13) | 139.1     |
| N11B | H11H | O10 <sup>7</sup> | 0.91      | 2.16      | 3.001(12) | 154.0     |
| O11B | H11I | O5 <sup>7</sup>  | 0.878(14) | 2.50(5)   | 3.125(9)  | 128(5)    |
| O11B | H11I | O10 <sup>7</sup> | 0.878(14) | 2.49(6)   | 3.220(9)  | 141(7)    |

---  
<sup>1</sup>-x,1-y,-z; <sup>2</sup>1-x,1-y,-z; <sup>3</sup>1-x,-1/2+y,1/2-z; <sup>4</sup>1-x,1/2+y,1/2-z; <sup>5</sup>1-x,1-y,1-z; <sup>6</sup>-x,1-y,1-z; <sup>7</sup>-1+x,+y,+z

**Table S8:** Atomic Occupancies for all atoms that are not fully occupied in **MAB4**.

| Atom | Occupancy | Atom | Occupancy | Atom | Occupancy | Atom | Occupancy |
|------|-----------|------|-----------|------|-----------|------|-----------|
| H12A | 0.603(11) | C11  | 0.603(11) | H11D | 0.603(11) | H14D | 0.397(11) |
| H12B | 0.603(11) | H11A | 0.603(11) | O11  | 0.603(11) | N11B | 0.397(11) |
| H12C | 0.397(11) | H11B | 0.603(11) | H11  | 0.603(11) | H11G | 0.397(11) |
| H12D | 0.397(11) | C14  | 0.603(11) | C11B | 0.397(11) | H11H | 0.397(11) |
| H13A | 0.603(11) | H14A | 0.603(11) | H11E | 0.397(11) | O11B | 0.397(11) |
| H13B | 0.603(11) | H14B | 0.603(11) | H11F | 0.397(11) | H11I | 0.397(11) |
| H13C | 0.397(11) | N11  | 0.603(11) | C14B | 0.397(11) |      |           |
| H13D | 0.397(11) | H11C | 0.603(11) | H14C | 0.397(11) |      |           |

## Compound 5

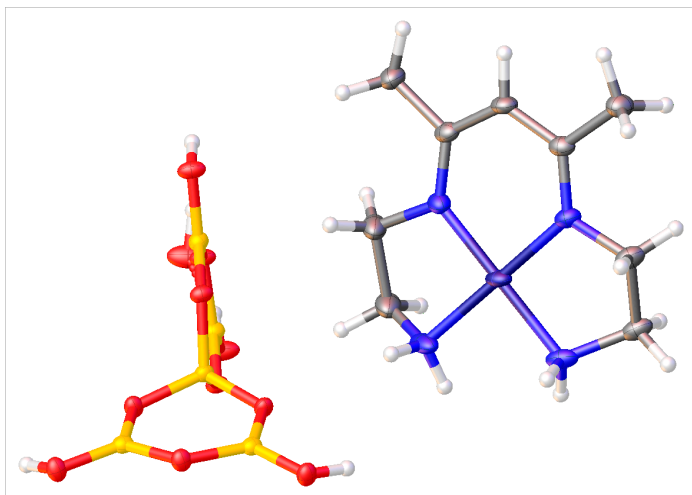

**Crystal Data.**  $\text{C}_9\text{H}_{25}\text{B}_5\text{N}_4\text{NiO}_{11}$ ,  $M_r = 478.09$ , triclinic,  $P-1$  (No. 2),  $a = 8.5386(2) \text{ \AA}$ ,  $b = 11.3328(3) \text{ \AA}$ ,  $c = 11.8717(3) \text{ \AA}$ ,  $\alpha = 115.914(3)^\circ$ ,  $\beta = 101.626(2)^\circ$ ,  $\gamma = 99.670(2)^\circ$ ,  $V = 968.39(5) \text{ \AA}^3$ ,  $T = 100(2) \text{ K}$ ,  $Z = 2$ ,  $Z' = 1$ ,  $\mu(\text{Mo K}\alpha) = 1.065$ , 16639 reflections measured, 4433 unique ( $R_{\text{int}} = 0.0216$ ) which were used in all calculations. The final  $wR_2$  was 0.0765 (all data) and  $R_1$  was 0.0278 ( $I \geq 2 \sigma(I)$ ).

| Compound                              | MAB5                                                         |
|---------------------------------------|--------------------------------------------------------------|
| Formula                               | $\text{C}_9\text{H}_{25}\text{B}_5\text{N}_4\text{NiO}_{11}$ |
| $D_{\text{calc.}} / \text{g cm}^{-3}$ | 1.640                                                        |
| $\mu / \text{mm}^{-1}$                | 1.065                                                        |
| Formula Weight                        | 478.09                                                       |
| Colour                                | pink                                                         |
| Shape                                 | block-shaped                                                 |
| Size/ $\text{mm}^3$                   | $0.05 \times 0.04 \times 0.04$                               |
| $T / \text{K}$                        | 100(2)                                                       |
| Crystal System                        | triclinic                                                    |
| Space Group                           | $P-1$                                                        |
| $a / \text{\AA}$                      | 8.5386(2)                                                    |
| $b / \text{\AA}$                      | 11.3328(3)                                                   |
| $c / \text{\AA}$                      | 11.8717(3)                                                   |
| $\alpha / ^\circ$                     | 115.914(3)                                                   |
| $\beta / ^\circ$                      | 101.626(2)                                                   |
| $\gamma / ^\circ$                     | 99.670(2)                                                    |
| $V / \text{\AA}^3$                    | 968.39(5)                                                    |
| $Z$                                   | 2                                                            |
| $Z'$                                  | 1                                                            |
| Wavelength/ $\text{\AA}$              | 0.71075                                                      |
| Radiation type                        | Mo $\text{K}\alpha$                                          |
| $\theta_{\text{min}} / ^\circ$        | 2.545                                                        |
| $\theta_{\text{max}} / ^\circ$        | 27.481                                                       |
| Measured Refl's.                      | 16639                                                        |
| Indep't Refl's                        | 4433                                                         |
| Refl's $I \geq 2 \sigma(I)$           | 4042                                                         |
| $R_{\text{int}}$                      | 0.0216                                                       |
| Parameters                            | 280                                                          |
| Restraints                            | 0                                                            |
| Largest Peak                          | 0.459                                                        |
| Deepest Hole                          | -0.318                                                       |
| GooF                                  | 1.036                                                        |
| $wR_2$ (all data)                     | 0.0765                                                       |
| $wR_2$                                | 0.0745                                                       |
| $R_1$ (all data)                      | 0.0314                                                       |
| $R_1$                                 | 0.0278                                                       |



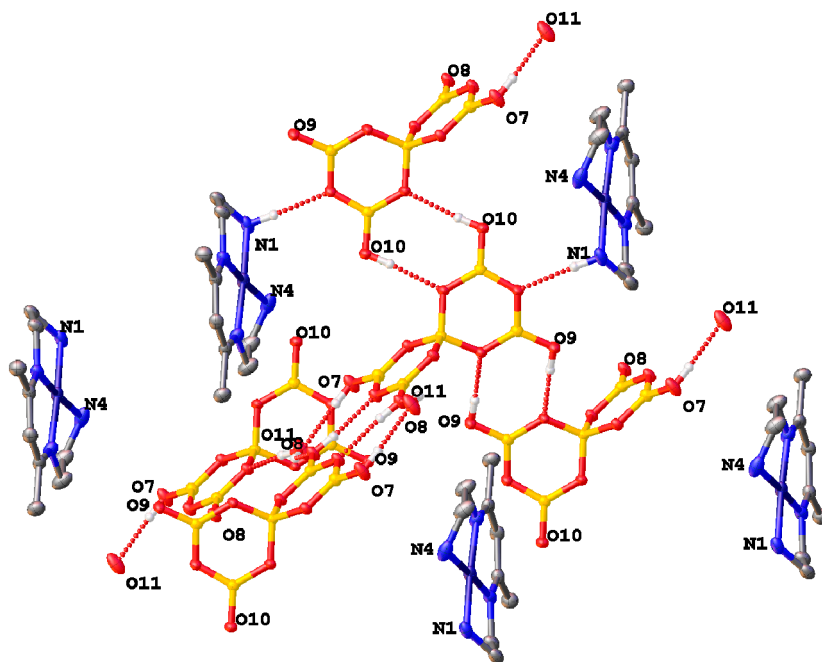

**Figure S1:** The following hydrogen bonding interactions with a maximum D-D distance of 2.9 Å and a minimum angle of 120 ° are present in **MAB5**: N1-O5\_1: 2.958 Å, N1-O1\_2: 3.375 Å, N4-O1\_2: 2.952 Å, O7-O11: 2.654 Å, O8-O2\_3: 2.793 Å, O9-O4\_4: 2.696 Å, O10-O6\_1: 2.756 Å, O11-O3\_5: 2.739 Å, O11-O8\_3: 2.781 Å.

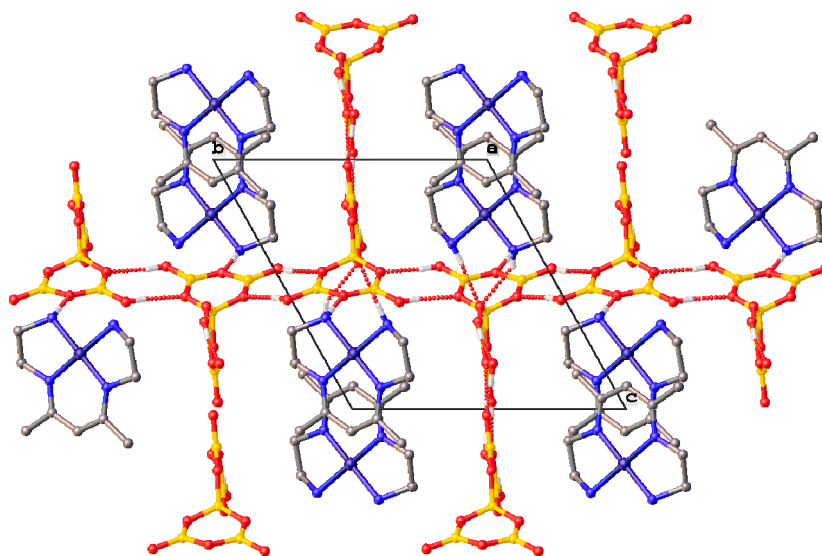

**Figure S2:** Packing diagram of MAB5.

**Table S1:** Fractional Atomic Coordinates ( $\times 10^4$ ) and Equivalent Isotropic Displacement Parameters ( $\text{\AA}^2 \times 10^3$ ) for **MAB5**.  $U_{eq}$  is defined as 1/3 of the trace of the orthogonalised  $U_{ij}$ .

| Atom | x          | y           | z          | $U_{eq}$ |
|------|------------|-------------|------------|----------|
| C1   | 3718(2)    | -615.8(19)  | 3117.5(16) | 24.8(3)  |
| C2   | 4111(2)    | -1153.5(19) | 1832.7(16) | 24.3(3)  |
| C3   | 3105.3(19) | -1054.7(17) | -163.1(15) | 19.8(3)  |
| C4   | 2414(2)    | -487.7(17)  | -901.6(15) | 21.6(3)  |
| C5   | 1919(2)    | 696.8(17)   | -412.6(15) | 20.6(3)  |

| Atom | x           | y           | z           | $U_{eq}$ |
|------|-------------|-------------|-------------|----------|
| C6   | 1662(3)     | 2744.9(19)  | 1287.1(18)  | 32.4(4)  |
| C7   | 1635(3)     | 3230(2)     | 2683.9(18)  | 34.5(4)  |
| C8   | 3524(2)     | -2366.9(18) | -884.5(17)  | 26.3(4)  |
| C9   | 1096(2)     | 1097.8(19)  | -1384.5(16) | 26.7(4)  |
| B1   | 8857.0(19)  | 6855.1(17)  | 3903.0(15)  | 12.9(3)  |
| B2   | 5765(2)     | 6324.8(18)  | 3147.5(16)  | 16.0(3)  |
| B3   | 7216(2)     | 5750.7(17)  | 1543.0(16)  | 13.9(3)  |
| B4   | 11416(2)    | 8830.2(17)  | 5173.6(15)  | 14.0(3)  |
| B5   | 11425(2)    | 6739.7(17)  | 5206.7(16)  | 13.8(3)  |
| N1   | 4033.2(17)  | 876.5(16)   | 3642.7(13)  | 23.8(3)  |
| N2   | 3364.8(16)  | -499.1(15)  | 1122.6(13)  | 19.6(3)  |
| N3   | 2143.2(17)  | 1470.7(14)  | 858.6(13)   | 21.0(3)  |
| N4   | 3080(2)     | 2989.5(15)  | 3369.7(14)  | 30.4(3)  |
| O1   | 7224.0(12)  | 6748.4(11)  | 4103.5(10)  | 14.2(2)  |
| O2   | 5727.1(12)  | 5829.4(11)  | 1831.6(10)  | 16.0(2)  |
| O3   | 8673.6(12)  | 6180.6(11)  | 2483.7(10)  | 14.1(2)  |
| O4   | 9759.8(12)  | 8310.4(11)  | 4501.1(10)  | 15.1(2)  |
| O5   | 12284.9(12) | 8019.2(11)  | 5456.7(10)  | 15.5(2)  |
| O6   | 9768.7(12)  | 6193.7(10)  | 4512.4(10)  | 14.5(2)  |
| O7   | 4370.0(14)  | 6376.3(14)  | 3497.9(11)  | 26.2(3)  |
| O8   | 7211.7(13)  | 5216.0(12)  | 264.7(10)   | 17.7(2)  |
| O9   | 12279.7(12) | 10144.6(11) | 5622.5(11)  | 16.8(2)  |
| O10  | 12297.0(13) | 6097.2(11)  | 5710.6(11)  | 17.1(2)  |
| O11  | 1554.4(14)  | 6058.4(15)  | 1815.2(12)  | 32.6(3)  |
| Ni1  | 3143.8(2)   | 1183.3(2)   | 2210.1(2)   | 19.48(7) |

**Table S2:** Anisotropic Displacement Parameters ( $\times 10^4$ ) for **MAB5**. The anisotropic displacement factor exponent takes the form:  $-2\pi^2 [h^2 a^{*2} \times U_{11} + \dots + 2hka^* \times b^* \times U_{12}]$

| Atom | $U_{11}$  | $U_{22}$  | $U_{33}$  | $U_{23}$ | $U_{13}$ | $U_{12}$ |
|------|-----------|-----------|-----------|----------|----------|----------|
| C1   | 19.4(7)   | 38.2(10)  | 18.4(7)   | 16.6(7)  | 4.4(6)   | 6.0(7)   |
| C2   | 21.6(8)   | 35.4(10)  | 19.7(8)   | 15.7(7)  | 6.8(6)   | 10.3(7)  |
| C3   | 18.3(7)   | 23.2(8)   | 15.3(7)   | 7.5(6)   | 6.5(6)   | 3.3(6)   |
| C4   | 24.7(8)   | 24.4(8)   | 12.5(7)   | 7.1(6)   | 6.3(6)   | 4.3(6)   |
| C5   | 21.6(7)   | 23.0(8)   | 15.5(7)   | 9.6(6)   | 6.5(6)   | 1.5(6)   |
| C6   | 56.8(12)  | 22.1(9)   | 23.7(9)   | 11.4(7)  | 20.7(8)  | 14.1(8)  |
| C7   | 60.5(13)  | 23.6(9)   | 24.2(9)   | 10.6(8)  | 22.7(9)  | 15.1(9)  |
| C8   | 31.6(9)   | 27.1(9)   | 20.2(8)   | 10.0(7)  | 9.6(7)   | 10.9(7)  |
| C9   | 36.1(9)   | 27.2(9)   | 19.6(8)   | 12.9(7)  | 10.1(7)  | 10.0(7)  |
| B1   | 12.8(7)   | 14.5(8)   | 11.5(7)   | 6.8(6)   | 2.5(5)   | 4.7(6)   |
| B2   | 15.3(7)   | 18.7(8)   | 13.4(7)   | 7.2(6)   | 5.0(6)   | 5.0(6)   |
| B3   | 14.3(7)   | 15.1(8)   | 13.8(7)   | 7.7(6)   | 5.1(6)   | 5.3(6)   |
| B4   | 14.2(7)   | 16.5(8)   | 12.1(7)   | 6.7(6)   | 4.8(6)   | 6.2(6)   |
| B5   | 14.7(7)   | 15.5(8)   | 12.2(7)   | 6.6(6)   | 5.0(6)   | 6.5(6)   |
| N1   | 16.1(6)   | 34.7(8)   | 13.5(6)   | 8.7(6)   | 3.3(5)   | 0.8(6)   |
| N2   | 17.4(6)   | 25.8(7)   | 14.7(6)   | 10.0(6)  | 4.8(5)   | 4.3(5)   |
| N3   | 27.6(7)   | 18.2(7)   | 16.7(6)   | 7.3(5)   | 10.4(5)  | 4.6(5)   |
| N4   | 43.0(9)   | 23.4(7)   | 15.7(7)   | 4.8(6)   | 13.2(6)  | -3.3(6)  |
| O1   | 12.9(5)   | 18.5(5)   | 11.1(5)   | 7.0(4)   | 3.6(4)   | 4.8(4)   |
| O2   | 11.9(5)   | 23.5(6)   | 10.8(5)   | 6.9(4)   | 3.0(4)   | 5.6(4)   |
| O3   | 11.8(5)   | 19.2(5)   | 12.0(5)   | 7.6(4)   | 3.9(4)   | 5.7(4)   |
| O4   | 12.7(5)   | 13.8(5)   | 16.9(5)   | 7.7(4)   | 0.6(4)   | 3.8(4)   |
| O5   | 12.2(5)   | 15.6(5)   | 18.7(5)   | 8.8(4)   | 2.7(4)   | 5.1(4)   |
| O6   | 14.1(5)   | 14.7(5)   | 14.4(5)   | 8.4(4)   | 0.9(4)   | 3.5(4)   |
| O7   | 14.3(5)   | 44.1(8)   | 14.7(5)   | 9.9(5)   | 4.9(4)   | 7.6(5)   |
| O8   | 12.5(5)   | 27.1(6)   | 11.7(5)   | 8.0(4)   | 3.5(4)   | 6.0(4)   |
| O9   | 12.8(5)   | 14.8(5)   | 22.0(5)   | 8.8(4)   | 3.2(4)   | 4.9(4)   |
| O10  | 15.4(5)   | 16.7(5)   | 19.7(5)   | 10.6(4)  | 2.0(4)   | 5.0(4)   |
| O11  | 15.9(6)   | 52.2(9)   | 19.4(6)   | 7.5(6)   | 6.9(5)   | 11.5(6)  |
| Ni1  | 20.08(11) | 22.15(12) | 10.75(10) | 5.25(8)  | 5.44(8)  | 0.18(8)  |

**Table S3:** Bond Lengths in Å for **MAB5**.

| Atom | Atom | Length/Å   | Atom | Atom | Length/Å   |
|------|------|------------|------|------|------------|
| C1   | C2   | 1.508(2)   | B2   | O1   | 1.3501(19) |
| C1   | N1   | 1.476(2)   | B2   | O2   | 1.4011(18) |
| C2   | N2   | 1.468(2)   | B2   | O7   | 1.3409(19) |
| C3   | C4   | 1.393(2)   | B3   | O2   | 1.3885(18) |
| C3   | C8   | 1.504(2)   | B3   | O3   | 1.3395(19) |
| C3   | N2   | 1.324(2)   | B3   | O8   | 1.3651(19) |
| C4   | C5   | 1.388(2)   | B4   | O4   | 1.3560(19) |
| C5   | C9   | 1.507(2)   | B4   | O5   | 1.3807(19) |
| C5   | N3   | 1.324(2)   | B4   | O9   | 1.351(2)   |
| C6   | C7   | 1.508(2)   | B5   | O5   | 1.3814(19) |
| C6   | N3   | 1.468(2)   | B5   | O6   | 1.3610(19) |
| C7   | N4   | 1.470(3)   | B5   | O10  | 1.3513(19) |
| B1   | O1   | 1.4553(18) | N1   | Ni1  | 1.9171(14) |
| B1   | O3   | 1.4750(18) | N2   | Ni1  | 1.8453(14) |
| B1   | O4   | 1.4653(19) | N3   | Ni1  | 1.8461(14) |
| B1   | O6   | 1.4609(18) | N4   | Ni1  | 1.9218(15) |

**Table S4:** Bond Angles in ° for **MAB5**.

| Atom | Atom | Atom | Angle/°    | Atom | Atom | Atom | Angle/°    |
|------|------|------|------------|------|------|------|------------|
| N1   | C1   | C2   | 106.32(13) | O9   | B4   | O5   | 117.08(13) |
| N2   | C2   | C1   | 106.92(14) | O6   | B5   | O5   | 120.36(13) |
| C4   | C3   | C8   | 117.56(14) | O10  | B5   | O5   | 116.77(13) |
| N2   | C3   | C4   | 122.57(15) | O10  | B5   | O6   | 122.85(14) |
| N2   | C3   | C8   | 119.86(15) | C1   | N1   | Ni1  | 107.98(10) |
| C5   | C4   | C3   | 125.66(14) | C2   | N2   | Ni1  | 113.75(10) |
| C4   | C5   | C9   | 117.74(14) | C3   | N2   | C2   | 119.27(14) |
| N3   | C5   | C4   | 122.59(15) | C3   | N2   | Ni1  | 126.46(12) |
| N3   | C5   | C9   | 119.68(15) | C5   | N3   | C6   | 118.50(14) |
| N3   | C6   | C7   | 107.40(15) | C5   | N3   | Ni1  | 126.73(12) |
| N4   | C7   | C6   | 107.03(16) | C6   | N3   | Ni1  | 114.64(11) |
| O1   | B1   | O3   | 110.39(11) | C7   | N4   | Ni1  | 107.08(11) |
| O1   | B1   | O4   | 108.45(12) | B2   | O1   | B1   | 124.66(11) |
| O1   | B1   | O6   | 109.23(11) | B3   | O2   | B2   | 118.09(12) |
| O4   | B1   | O3   | 108.89(11) | B3   | O3   | B1   | 123.37(11) |
| O6   | B1   | O3   | 109.26(12) | B4   | O4   | B1   | 122.78(12) |
| O6   | B1   | O4   | 110.62(12) | B4   | O5   | B5   | 119.65(12) |
| O1   | B2   | O2   | 120.40(13) | B5   | O6   | B1   | 122.53(12) |
| O7   | B2   | O1   | 117.93(13) | N1   | Ni1  | N4   | 92.81(7)   |
| O7   | B2   | O2   | 121.66(14) | N2   | Ni1  | N1   | 86.46(6)   |
| O3   | B3   | O2   | 122.05(13) | N2   | Ni1  | N3   | 95.21(6)   |
| O3   | B3   | O8   | 118.30(13) | N2   | Ni1  | N4   | 175.96(6)  |
| O8   | B3   | O2   | 119.64(13) | N3   | Ni1  | N1   | 175.85(6)  |
| O4   | B4   | O5   | 120.14(14) | N3   | Ni1  | N4   | 85.79(6)   |
| O9   | B4   | O4   | 122.76(13) |      |      |      |            |

**Table S5:** Torsion Angles in ° for **MAB5**.

| Atom | Atom | Atom | Atom | Angle/°     |
|------|------|------|------|-------------|
| C1   | C2   | N2   | C3   | -161.06(14) |
| C1   | C2   | N2   | Ni1  | 26.63(16)   |
| C2   | C1   | N1   | Ni1  | 42.62(14)   |
| C2   | N2   | Ni1  | N1   | -2.27(11)   |
| C2   | N2   | Ni1  | N3   | -178.45(11) |
| C3   | C4   | C5   | C9   | -176.21(15) |
| C3   | C4   | C5   | N3   | 3.8(3)      |
| C3   | N2   | Ni1  | N1   | -173.92(14) |

| Atom | Atom | Atom | Atom | Angle/°     |
|------|------|------|------|-------------|
| C3   | N2   | Ni1  | N3   | 9.90(14)    |
| C4   | C3   | N2   | C2   | -179.52(14) |
| C4   | C3   | N2   | Ni1  | -8.3(2)     |
| C4   | C5   | N3   | C6   | 176.61(15)  |
| C4   | C5   | N3   | Ni1  | 0.9(2)      |
| C5   | N3   | Ni1  | N2   | -6.27(14)   |
| C5   | N3   | Ni1  | N4   | 169.80(14)  |
| C6   | C7   | N4   | Ni1  | -44.71(16)  |
| C6   | N3   | Ni1  | N2   | 177.91(12)  |
| C6   | N3   | Ni1  | N4   | -6.02(12)   |
| C7   | C6   | N3   | C5   | 166.08(16)  |
| C7   | C6   | N3   | Ni1  | -17.7(2)    |
| C8   | C3   | C4   | C5   | 178.57(15)  |
| C8   | C3   | N2   | C2   | 2.0(2)      |
| C8   | C3   | N2   | Ni1  | 173.22(11)  |
| C9   | C5   | N3   | C6   | -3.4(2)     |
| C9   | C5   | N3   | Ni1  | -179.07(11) |
| N1   | C1   | C2   | N2   | -44.11(17)  |
| N2   | C3   | C4   | C5   | 0.0(3)      |
| N3   | C6   | C7   | N4   | 40.1(2)     |
| O1   | B1   | O3   | B3   | 10.50(19)   |
| O1   | B1   | O4   | B4   | 140.31(13)  |
| O1   | B1   | O6   | B5   | -138.62(13) |
| O1   | B2   | O2   | B3   | 1.9(2)      |
| O2   | B2   | O1   | B1   | 5.9(2)      |
| O2   | B3   | O3   | B1   | -4.2(2)     |
| O3   | B1   | O1   | B2   | -11.38(19)  |
| O3   | B1   | O4   | B4   | -99.54(14)  |
| O3   | B1   | O6   | B5   | 100.54(15)  |
| O3   | B3   | O2   | B2   | -2.6(2)     |
| O4   | B1   | O1   | B2   | 107.83(15)  |
| O4   | B1   | O3   | B3   | -108.45(15) |
| O4   | B1   | O6   | B5   | -19.32(18)  |
| O4   | B4   | O5   | B5   | -8.4(2)     |
| O5   | B4   | O4   | B1   | -7.8(2)     |
| O5   | B5   | O6   | B1   | 5.5(2)      |
| O6   | B1   | O1   | B2   | -131.54(14) |
| O6   | B1   | O3   | B3   | 130.64(14)  |
| O6   | B1   | O4   | B4   | 20.54(18)   |
| O6   | B5   | O5   | B4   | 9.6(2)      |
| O7   | B2   | O1   | B1   | -175.11(14) |
| O7   | B2   | O2   | B3   | -177.08(15) |
| O8   | B3   | O2   | B2   | 177.10(13)  |
| O8   | B3   | O3   | B1   | 176.02(13)  |
| O9   | B4   | O4   | B1   | 173.87(13)  |
| O9   | B4   | O5   | B5   | 169.97(12)  |
| O10  | B5   | O5   | B4   | -168.78(13) |
| O10  | B5   | O6   | B1   | -176.21(13) |

**Table S6:** Hydrogen Fractional Atomic Coordinates ( $\times 10^4$ ) and Equivalent Isotropic Displacement Parameters ( $\text{\AA}^2 \times 10^3$ ) for **MAB5**.  $U_{eq}$  is defined as 1/3 of the trace of the orthogonalised  $U_{ij}$ .

| Atom | x       | y        | z        | $U_{eq}$ |
|------|---------|----------|----------|----------|
| H1A  | 2537.22 | -1054.32 | 2971.42  | 30       |
| H1B  | 4443.53 | -807.18  | 3741.69  | 30       |
| H2A  | 5335.39 | -923.25  | 1997.97  | 29       |
| H2B  | 3633.42 | -2162.45 | 1309.58  | 29       |
| H4   | 2269.56 | -952.06  | -1819.63 | 26       |
| H6A  | 544.53  | 2576.71  | 707.69   | 39       |
| H6B  | 2477.76 | 3446.84  | 1247.06  | 39       |
| H7A  | 1713.39 | 4218.27  | 3121.76  | 41       |

| Atom | x        | y        | z        | $U_{eq}$ |
|------|----------|----------|----------|----------|
| H7B  | 583.9    | 2714.82  | 2692.75  | 41       |
| H8A  | 4672.07  | -2272.55 | -437.31  | 40       |
| H8B  | 3419.06  | -2563.28 | -1790.8  | 40       |
| H8C  | 2751.99  | -3120.04 | -895.68  | 40       |
| H9A  | -68.69   | 1033.13  | -1403.77 | 40       |
| H9B  | 1130.82  | 479.22   | -2263.03 | 40       |
| H9C  | 1692.03  | 2041.87  | -1118.72 | 40       |
| H1C  | 5150.25  | 1307.1   | 4010.1   | 29       |
| H1D  | 3528.87  | 1215.82  | 4273.56  | 29       |
| H4A  | 2968.69  | 3046.4   | 4136.83  | 36       |
| H4B  | 4039.16  | 3626.46  | 3559     | 36       |
| H7   | 3559.85  | 6152.26  | 2837.85  | 39       |
| H8   | 6228.08  | 4956.84  | -232.21  | 27       |
| H9   | 11610.34 | 10587.97 | 5540.14  | 25       |
| H10  | 11640.38 | 5388.28  | 5602.16  | 26       |
| H11A | 586.45   | 5981.91  | 1945.8   | 49       |
| H11B | 1423.16  | 5556.29  | 984.41   | 49       |

**Table S7:** Hydrogen Bond information for **MAB5**.

| D   | H    | A               | d(D-H)/Å | d(H-A)/Å | d(D-A)/Å   | D-H-A/deg |
|-----|------|-----------------|----------|----------|------------|-----------|
| N1  | H1C  | O5 <sup>1</sup> | 0.91     | 2.06     | 2.9576(17) | 169.4     |
| N1  | H1D  | O1 <sup>2</sup> | 0.91     | 2.56     | 3.3749(18) | 149.1     |
| N4  | H4A  | O1 <sup>2</sup> | 0.91     | 2.04     | 2.9520(17) | 177.8     |
| O7  | H7   | O11             | 0.84     | 1.85     | 2.6542(17) | 161.1     |
| O8  | H8   | O2 <sup>3</sup> | 0.84     | 1.98     | 2.7930(15) | 161.9     |
| O9  | H9   | O4 <sup>4</sup> | 0.84     | 1.86     | 2.6955(14) | 175.1     |
| O10 | H10  | O6 <sup>1</sup> | 0.84     | 1.92     | 2.7558(15) | 175.7     |
| O11 | H11A | O3 <sup>5</sup> | 0.87     | 1.88     | 2.7395(15) | 168.7     |
| O11 | H11B | O8 <sup>3</sup> | 0.87     | 2.06     | 2.7813(16) | 140.5     |

-----  
<sup>1</sup>2-x,1-y,1-z; <sup>2</sup>1-x,1-y,1-z; <sup>3</sup>1-x,1-y,-z; <sup>4</sup>2-x,2-y,1-z; <sup>5</sup>-1+x,+y,+z

## Compound 6

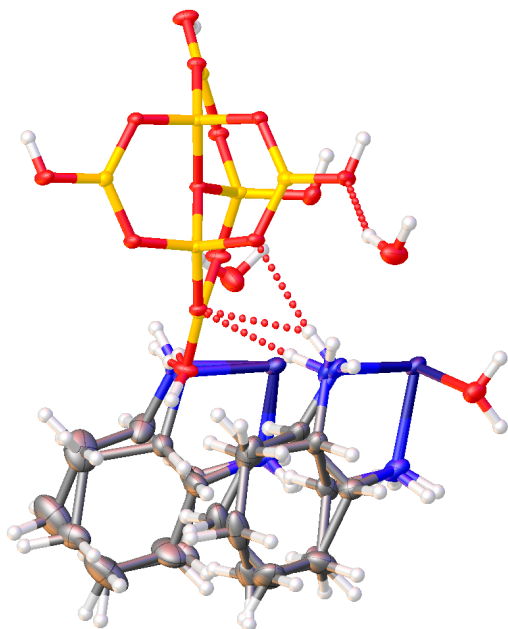

**Crystal Data.**  $C_{12}H_{39}B_7N_4NiO_{17}$ ,  $M_r = 645.85$ , monoclinic,  $C2/c$  (No. 15),  $a = 22.3539(4)$  Å,  $b = 11.0192(2)$  Å,  $c = 22.8834(4)$  Å,  $\beta = 107.630(2)^\circ$ ,  $\alpha = \gamma = 90^\circ$ ,  $V = 5371.94(18)$  Å<sup>3</sup>,  $T = 100(2)$  K,  $Z = 8$ ,  $Z' = 1$ ,  $\mu(\text{Mo } K\alpha) = 0.806$ , 33628 reflections measured, 6154 unique ( $R_{\text{int}} = 0.0281$ ) which were used in all calculations. The final  $wR_2$  was 0.1087 (all data) and  $R_1$  was 0.0384 ( $I \geq 2 \sigma(I)$ ).

| Compound                              | MAB6                           |
|---------------------------------------|--------------------------------|
| Formula                               | $C_{12}H_{39}B_7N_4NiO_{17}$   |
| $D_{\text{calc.}} / \text{g cm}^{-3}$ | 1.597                          |
| $\mu / \text{mm}^{-1}$                | 0.806                          |
| Formula Weight                        | 645.85                         |
| Colour                                | orange                         |
| Shape                                 | prism-shaped                   |
| Size/ $\text{mm}^3$                   | $0.15 \times 0.15 \times 0.09$ |
| $T / \text{K}$                        | 100(2)                         |
| Crystal System                        | monoclinic                     |
| Space Group                           | $C2/c$                         |
| $a / \text{\AA}$                      | 22.3539(4)                     |
| $b / \text{\AA}$                      | 11.0192(2)                     |
| $c / \text{\AA}$                      | 22.8834(4)                     |
| $\alpha / ^\circ$                     | 90                             |
| $\beta / ^\circ$                      | 107.630(2)                     |
| $\gamma / ^\circ$                     | 90                             |
| $V / \text{\AA}^3$                    | 5371.94(18)                    |
| $Z$                                   | 8                              |
| $Z'$                                  | 1                              |
| Wavelength/ $\text{\AA}$              | 0.71075                        |
| Radiation type                        | Mo $K\alpha$                   |
| $\theta_{\text{min}} / ^\circ$        | 2.159                          |
| $\theta_{\text{max}} / ^\circ$        | 27.483                         |
| Measured Refl's.                      | 33628                          |
| Indep't Refl's                        | 6154                           |
| Refl's $I \geq 2 \sigma(I)$           | 5759                           |
| $R_{\text{int}}$                      | 0.0281                         |
| Parameters                            | 519                            |
| Restraints                            | 1247                           |
| Largest Peak                          | 0.842                          |
| Deepest Hole                          | -0.714                         |
| GooF                                  | 1.051                          |
| $wR_2$ (all data)                     | 0.1087                         |
| $wR_2$                                | 0.1072                         |
| $R_1$ (all data)                      | 0.0408                         |
| $R_1$                                 | 0.0384                         |

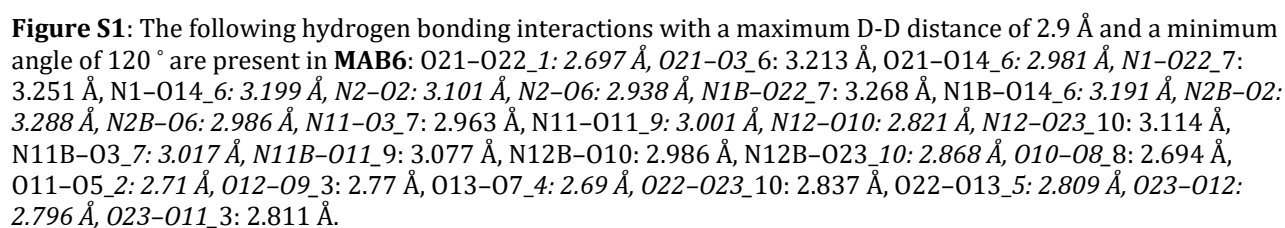

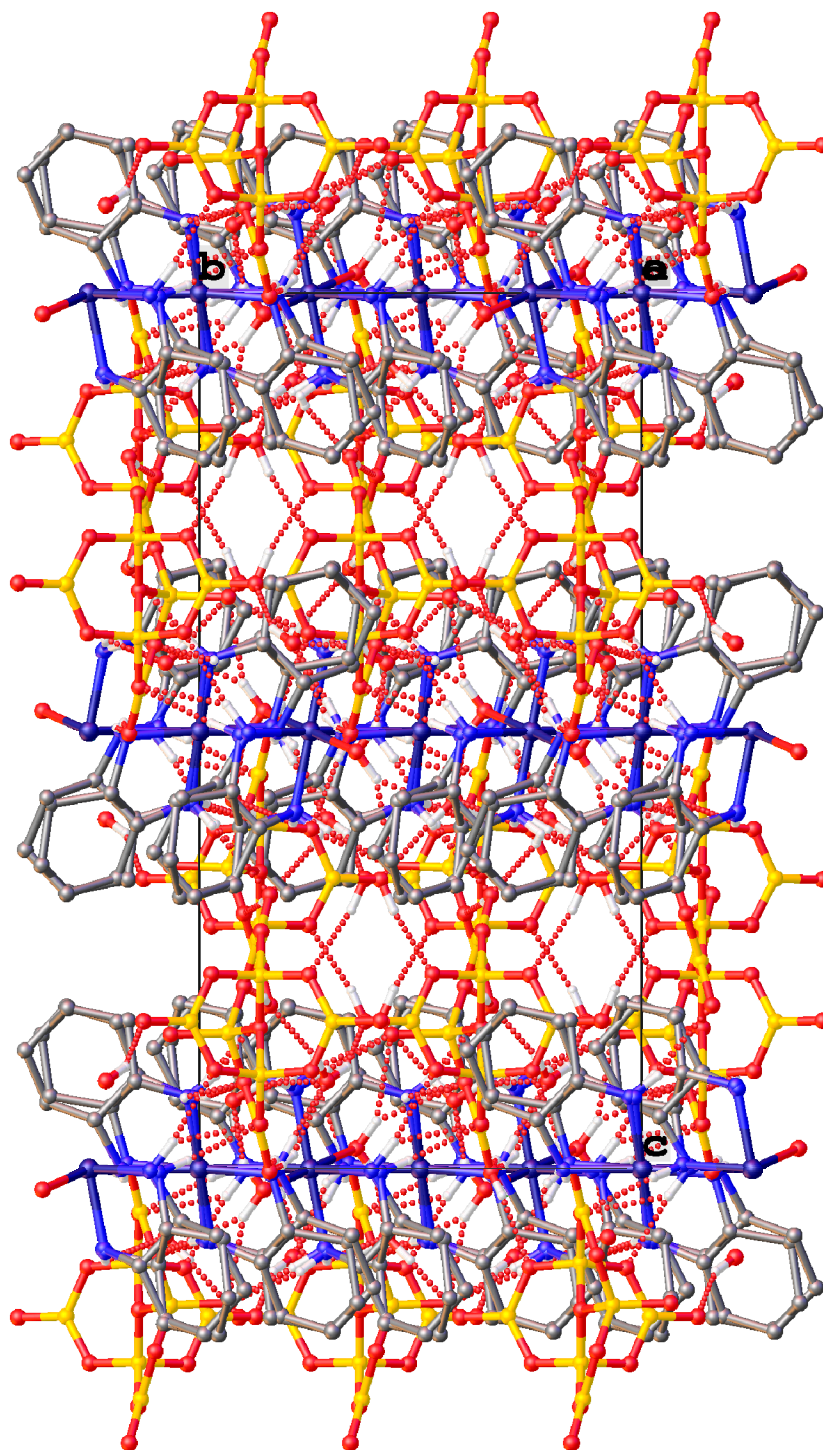

**Figure S2:** Packing diagram of MAB6.

**Table S1:** Fractional Atomic Coordinates ( $\times 10^4$ ) and Equivalent Isotropic Displacement Parameters ( $\text{\AA}^2 \times 10^3$ ) for **MAB6**.  $U_{eq}$  is defined as 1/3 of the trace of the orthogonalised  $U_{ij}$ .

| Atom | x         | y          | z          | $U_{eq}$  |
|------|-----------|------------|------------|-----------|
| Ni1  | 7500      | 2500       | 5000       | 17.99(10) |
| O21  | 8346.5(7) | 1451.2(14) | 5235.0(7)  | 23.4(3)   |
| N1   | 7700(7)   | 2875(13)   | 5949(7)    | 22.3(13)  |
| N2   | 8055(6)   | 4073(10)   | 5045(3)    | 20.1(13)  |
| C1   | 8014(2)   | 4074(4)    | 6097.1(17) | 22.8(9)   |
| C2   | 8438(2)   | 4263(4)    | 5690.8(19) | 23.8(9)   |



| Atom | x          | y          | z          | $U_{eq}$  |
|------|------------|------------|------------|-----------|
| C3   | 8750(6)    | 5514(10)   | 5803(3)    | 34.0(15)  |
| C4   | 9136(2)    | 5660(5)    | 6477(3)    | 42.0(13)  |
| C5   | 8733(3)    | 5432(6)    | 6889(3)    | 44.3(17)  |
| C6   | 8399(6)    | 4200(10)   | 6767(3)    | 39(3)     |
| N1B  | 7690(11)   | 2830(20)   | 5915(10)   | 21.4(18)  |
| N2B  | 8096(10)   | 3898(16)   | 5023(5)    | 21(2)     |
| C1B  | 8244(3)    | 3644(6)    | 6107(2)    | 23.3(14)  |
| C2B  | 8182(4)    | 4588(6)    | 5600(3)    | 27.1(15)  |
| C3B  | 8770(8)    | 5393(16)   | 5764(5)    | 30.9(19)  |
| C4B  | 8864(5)    | 6017(7)    | 6382(3)    | 39.7(18)  |
| C5B  | 8910(5)    | 5107(9)    | 6889(4)    | 45(3)     |
| C6B  | 8349(7)    | 4234(12)   | 6730(4)    | 25(3)     |
| Ni2  | 5000       | 5000       | 5000       | 16.09(10) |
| N11  | 4948(8)    | 5151(7)    | 5814(5)    | 20.6(11)  |
| N12  | 5275(4)    | 6634(7)    | 5058(2)    | 16.8(11)  |
| C11  | 5002.4(19) | 6453(4)    | 5998.8(18) | 21.5(8)   |
| C12  | 5472.6(18) | 7004(3)    | 5711.6(15) | 22.8(8)   |
| C13  | 5534(4)    | 8377(5)    | 5832(2)    | 28.0(12)  |
| C14  | 5753(2)    | 8574(5)    | 6530(2)    | 36.1(11)  |
| C15  | 5313(2)    | 7983(4)    | 6836(2)    | 36.7(10)  |
| C16  | 5243(3)    | 6620(6)    | 6693(2)    | 30.6(13)  |
| N11B | 4948(16)   | 5272(16)   | 5821(11)   | 21(2)     |
| N12B | 5184(11)   | 6766(18)   | 4994(5)    | 16.8(11)  |
| C11B | 5285(6)    | 6410(7)    | 6066(4)    | 33(2)     |
| C12B | 5139(5)    | 7362(7)    | 5561(4)    | 36(2)     |
| C13B | 5591(12)   | 8449(16)   | 5761(8)    | 53(4)     |
| C14B | 5507(7)    | 8939(11)   | 6355(6)    | 66(3)     |
| C15B | 5632(7)    | 8004(11)   | 6856(5)    | 67(3)     |
| C16B | 5228(12)   | 6857(15)   | 6677(7)    | 56(5)     |
| O1   | 6846.4(6)  | 6368.3(11) | 3390.3(5)  | 9.8(2)    |
| O2   | 7285.0(6)  | 6363.2(12) | 4491.7(5)  | 11.8(3)   |
| O3   | 6182.8(6)  | 6011.7(13) | 4015.6(6)  | 16.6(3)   |
| O4   | 6422.6(6)  | 6393.6(12) | 2286.0(6)  | 11.8(2)   |
| O5   | 5755.1(6)  | 6005.5(12) | 2915.9(6)  | 13.0(3)   |
| O6   | 7826.7(6)  | 5344.8(12) | 3869.1(6)  | 12.3(2)   |
| O7   | 7361.4(6)  | 5271.0(11) | 2774.9(6)  | 11.5(2)   |
| O8   | 7763.3(6)  | 7533.3(11) | 3879.4(6)  | 12.3(3)   |
| O9   | 7361.8(6)  | 7480.5(11) | 2783.6(6)  | 11.2(2)   |
| O10  | 6528.4(6)  | 6588.4(13) | 5032.4(6)  | 17.0(3)   |
| O11  | 5337.7(6)  | 6590.5(13) | 1870.3(6)  | 16.7(3)   |
| O12  | 8064.5(7)  | 3733.4(12) | 3314.1(6)  | 16.1(3)   |
| O13  | 8018.1(7)  | 9099.1(12) | 3306.0(6)  | 17.0(3)   |
| O14  | 6396.4(7)  | 4349.1(12) | 3467.9(6)  | 18.7(3)   |
| B1   | 6285.2(9)  | 5656.2(19) | 3445.3(9)  | 12.5(4)   |
| B2   | 7444.4(9)  | 6389.4(18) | 3926.8(9)  | 10.9(4)   |
| B3   | 6994.7(9)  | 6377.3(18) | 2790.6(9)  | 10.0(4)   |
| B4   | 6682.1(10) | 6338.5(19) | 4510.8(9)  | 13.0(4)   |
| B5   | 5847.4(10) | 6328.8(18) | 2370.8(9)  | 12.4(4)   |
| B6   | 7746.6(9)  | 4803.9(19) | 3316.5(9)  | 12.0(4)   |
| B7   | 7710.0(9)  | 8021.3(18) | 3318.5(9)  | 12.2(4)   |
| O22  | 3632.6(6)  | 5764.8(15) | 4220.3(8)  | 30.7(4)   |
| O23  | 9249.1(6)  | 2883.2(15) | 3994.0(7)  | 27.2(3)   |

**Table S2:** Anisotropic Displacement Parameters ( $\times 10^4$ ) for **MAB6**. The anisotropic displacement factor exponent takes the form:  $-2\pi^2[h^2a^{*2} \times U_{11} + \dots + 2hka^* \times b^* \times U_{12}]$

| Atom | $U_{11}$  | $U_{22}$  | $U_{33}$  | $U_{23}$ | $U_{13}$ | $U_{12}$ |
|------|-----------|-----------|-----------|----------|----------|----------|
| Ni1  | 18.70(19) | 18.77(19) | 15.43(18) | 5.65(13) | 3.57(14) | 0.20(13) |
| O21  | 26.4(8)   | 22.7(7)   | 19.5(7)   | 4.2(6)   | 4.7(6)   | 4.8(6)   |
| N1   | 22(2)     | 28(2)     | 16(2)     | 5(2)     | 4.1(19)  | 0.7(19)  |
| N2   | 22(2)     | 15(3)     | 22.0(18)  | 7.0(15)  | 4.3(15)  | 1(2)     |

| Atom | $U_{11}$  | $U_{22}$  | $U_{33}$  | $U_{23}$  | $U_{13}$ | $U_{12}$  |
|------|-----------|-----------|-----------|-----------|----------|-----------|
| C1   | 19(2)     | 22(2)     | 24.9(18)  | -2.7(15)  | 2.6(15)  | 8.4(15)   |
| C2   | 24(2)     | 21(2)     | 22.5(19)  | 1.9(15)   | 1.0(17)  | -0.6(16)  |
| C3   | 32(2)     | 20(3)     | 46(2)     | 2(2)      | 5(2)     | -4(2)     |
| C4   | 25(2)     | 25(2)     | 66(3)     | -9(2)     | -3(2)    | 3.2(19)   |
| C5   | 36(3)     | 40(3)     | 44(3)     | -17(3)    | -7(2)    | 5(2)      |
| C6   | 39(5)     | 48(5)     | 23(3)     | -7(3)     | 0(3)     | 1(4)      |
| N1B  | 20(3)     | 27(3)     | 17(3)     | 4(3)      | 6(3)     | -1(3)     |
| N2B  | 24(3)     | 18(4)     | 19(2)     | 8(2)      | 3(2)     | 3(3)      |
| C1B  | 22(3)     | 28(3)     | 19(2)     | 2(2)      | 5(2)     | -1(2)     |
| C2B  | 30(4)     | 23(3)     | 21(3)     | 5(2)      | -1(3)    | 0(3)      |
| C3B  | 29(3)     | 21(3)     | 39(3)     | 2(3)      | 4(3)     | 4(3)      |
| C4B  | 40(5)     | 24(3)     | 48(4)     | -5(3)     | 5(3)     | -2(3)     |
| C5B  | 46(6)     | 46(6)     | 28(4)     | 3(4)      | -9(4)    | -6(4)     |
| C6B  | 23(5)     | 27(5)     | 27(5)     | -4(4)     | 11(4)    | 13(3)     |
| Ni2  | 14.41(18) | 20.47(19) | 12.87(17) | 3.02(13)  | 3.35(13) | -2.94(13) |
| N11  | 18.1(17)  | 26(2)     | 16.1(17)  | 0.4(17)   | 3.0(15)  | -5.4(17)  |
| N12  | 13(3)     | 18(2)     | 18.1(13)  | 7.5(14)   | 2.3(16)  | 2.8(16)   |
| C11  | 14.4(18)  | 29.6(18)  | 21.1(16)  | -4.4(13)  | 6.3(15)  | -7.8(15)  |
| C12  | 25.8(18)  | 20.5(16)  | 23.0(16)  | -1.1(12)  | 8.8(13)  | -1.1(14)  |
| C13  | 27(3)     | 25(2)     | 31(2)     | 0.9(17)   | 8.0(19)  | 0.0(18)   |
| C14  | 31(2)     | 47(3)     | 30(2)     | -9.2(19)  | 9.2(18)  | -16(2)    |
| C15  | 33(2)     | 42(2)     | 35(2)     | -14.8(17) | 11.1(19) | -4.1(19)  |
| C16  | 23(2)     | 40(3)     | 29(2)     | -10.1(19) | 8.8(19)  | -11.9(18) |
| N11B | 19(3)     | 29(3)     | 15(3)     | 4(3)      | 5(3)     | -5(3)     |
| N12B | 13(3)     | 18(2)     | 18.1(13)  | 7.5(14)   | 2.3(16)  | 2.8(16)   |
| C11B | 43(6)     | 28(4)     | 27(4)     | -8(3)     | 10(4)    | -12(4)    |
| C12B | 48(5)     | 29(4)     | 40(4)     | 6(3)      | 30(4)    | 8(3)      |
| C13B | 47(7)     | 49(7)     | 76(8)     | -4(6)     | 38(7)    | 6(5)      |
| C14B | 57(8)     | 65(7)     | 81(8)     | -35(5)    | 26(6)    | -25(6)    |
| C15B | 52(7)     | 81(7)     | 62(6)     | -43(5)    | 8(6)     | -11(6)    |
| C16B | 80(10)    | 62(8)     | 38(6)     | -11(5)    | 34(7)    | -10(7)    |
| O1   | 10.1(6)   | 12.6(6)   | 6.3(5)    | 0.3(4)    | 2.0(4)   | -1.0(4)   |
| O2   | 12.9(6)   | 15.2(6)   | 7.2(5)    | 0.4(5)    | 2.6(5)   | -0.2(5)   |
| O3   | 13.9(6)   | 27.8(7)   | 8.4(6)    | -1.1(5)   | 3.7(5)   | -6.0(5)   |
| O4   | 11.2(6)   | 15.7(6)   | 7.6(5)    | 0.3(5)    | 1.7(5)   | 0.3(5)    |
| O5   | 11.3(6)   | 18.2(6)   | 8.5(6)    | 0.7(5)    | 1.5(5)   | -1.1(5)   |
| O6   | 12.9(6)   | 14.4(6)   | 8.5(6)    | 0.0(5)    | 1.5(5)   | 2.4(5)    |
| O7   | 14.7(6)   | 11.0(6)   | 8.3(6)    | -0.3(5)   | 3.0(5)   | 1.9(5)    |
| O8   | 13.3(6)   | 13.4(6)   | 8.8(6)    | 0.4(5)    | 1.2(5)   | -3.1(5)   |
| O9   | 13.9(6)   | 11.3(6)   | 8.0(6)    | 0.7(4)    | 2.6(5)   | -1.3(5)   |
| O10  | 14.8(6)   | 26.5(7)   | 9.9(6)    | -3.5(5)   | 4.2(5)   | -4.4(5)   |
| O11  | 10.9(6)   | 27.9(7)   | 9.9(6)    | 4.3(5)    | 1.2(5)   | -0.3(5)   |
| O12  | 20.4(7)   | 14.9(6)   | 10.8(6)   | -1.1(5)   | 1.5(5)   | 5.3(5)    |
| O13  | 21.8(7)   | 16.5(7)   | 10.1(6)   | 2.1(5)    | 0.7(5)   | -7.1(5)   |
| O14  | 22.1(7)   | 14.6(6)   | 16.2(7)   | 3.1(5)    | 1.0(5)   | -2.6(5)   |
| B1   | 12.1(9)   | 16.9(9)   | 7.3(8)    | 1.3(7)    | 1.2(7)   | -2.5(7)   |
| B2   | 12.1(9)   | 12.9(9)   | 7.1(8)    | 0.3(7)    | 2.1(7)   | 0.0(7)    |
| B3   | 11.8(9)   | 11.3(9)   | 6.9(8)    | -0.2(7)   | 2.7(7)   | 0.3(7)    |
| B4   | 15.5(9)   | 14.0(9)   | 9.4(8)    | 0.4(7)    | 3.8(7)   | -1.7(7)   |
| B5   | 13.7(9)   | 13.1(9)   | 9.5(8)    | -1.0(7)   | 2.2(7)   | -1.2(7)   |
| B6   | 12.4(9)   | 13.3(9)   | 10.5(9)   | 0.1(7)    | 3.5(7)   | -1.0(7)   |
| B7   | 13.6(9)   | 11.2(9)   | 11.4(9)   | 0.7(7)    | 3.1(7)   | 0.2(7)    |
| O22  | 41.4(10)  | 25.5(8)   | 27.2(8)   | -6.7(7)   | 13.5(7)  | -9.5(7)   |
| O23  | 28.3(8)   | 32.2(8)   | 19.1(7)   | -1.7(6)   | 4.4(6)   | 9.8(7)    |

**Table S3:** Bond Lengths in Å for **MAB6**.

| Atom | Atom             | Length/Å   |
|------|------------------|------------|
| Ni1  | O21              | 2.1422(15) |
| Ni1  | O21 <sup>1</sup> | 2.1421(15) |
| Ni1  | N1               | 2.121(15)  |

| Atom | Atom            | Length/Å  |
|------|-----------------|-----------|
| Ni1  | N1 <sup>1</sup> | 2.121(15) |
| Ni1  | N2              | 2.116(13) |
| Ni1  | N2 <sup>1</sup> | 2.116(13) |

| Atom | Atom              | Length/Å  |
|------|-------------------|-----------|
| Ni1  | N1B               | 2.04(2)   |
| Ni1  | N2B               | 2.03(2)   |
| Ni1  | N2B <sup>1</sup>  | 2.03(2)   |
| N1   | C1                | 1.487(7)  |
| N2   | C2                | 1.482(6)  |
| C1   | C2                | 1.529(5)  |
| C1   | C6                | 1.520(6)  |
| C2   | C3                | 1.531(7)  |
| C3   | C4                | 1.530(7)  |
| C4   | C5                | 1.510(7)  |
| C5   | C6                | 1.534(7)  |
| N1B  | C1B               | 1.486(8)  |
| N2B  | C2B               | 1.486(7)  |
| C1B  | C2B               | 1.533(6)  |
| C1B  | C6B               | 1.520(7)  |
| C2B  | C3B               | 1.534(8)  |
| C3B  | C4B               | 1.530(8)  |
| C4B  | C5B               | 1.513(7)  |
| C5B  | C6B               | 1.535(8)  |
| Ni2  | N11               | 1.908(12) |
| Ni2  | N11 <sup>2</sup>  | 1.908(12) |
| Ni2  | N12               | 1.894(9)  |
| Ni2  | N12 <sup>2</sup>  | 1.894(9)  |
| Ni2  | N11B <sup>2</sup> | 1.94(2)   |
| Ni2  | N11B              | 1.94(2)   |
| Ni2  | N12B              | 1.99(2)   |
| Ni2  | N12B <sup>2</sup> | 1.99(2)   |
| N11  | C11               | 1.490(6)  |
| N12  | C12               | 1.483(5)  |
| C11  | C12               | 1.524(4)  |
| C11  | C16               | 1.527(5)  |
| C12  | C13               | 1.536(6)  |
| C13  | C14               | 1.536(5)  |
| C14  | C15               | 1.515(5)  |
| C15  | C16               | 1.535(6)  |

| Atom                                                   | Atom | Length/Å |
|--------------------------------------------------------|------|----------|
| N11B                                                   | C11B | 1.482(8) |
| N12B                                                   | C12B | 1.484(7) |
| C11B                                                   | C12B | 1.522(7) |
| C11B                                                   | C16B | 1.522(8) |
| C12B                                                   | C13B | 1.544(9) |
| C13B                                                   | C14B | 1.526(9) |
| C14B                                                   | C15B | 1.503(9) |
| C15B                                                   | C16B | 1.535(9) |
| O1                                                     | B1   | 1.517(2) |
| O1                                                     | B2   | 1.517(2) |
| O1                                                     | B3   | 1.506(2) |
| O2                                                     | B2   | 1.441(2) |
| O2                                                     | B4   | 1.362(2) |
| O3                                                     | B1   | 1.445(2) |
| O3                                                     | B4   | 1.376(2) |
| O4                                                     | B3   | 1.440(2) |
| O4                                                     | B5   | 1.359(2) |
| O5                                                     | B1   | 1.466(2) |
| O5                                                     | B5   | 1.372(2) |
| O6                                                     | B2   | 1.463(2) |
| O6                                                     | B6   | 1.360(2) |
| O7                                                     | B3   | 1.475(2) |
| O7                                                     | B6   | 1.377(2) |
| O8                                                     | B2   | 1.468(2) |
| O8                                                     | B7   | 1.363(2) |
| O9                                                     | B3   | 1.469(2) |
| O9                                                     | B7   | 1.372(2) |
| O10                                                    | B4   | 1.366(2) |
| O11                                                    | B5   | 1.379(2) |
| O12                                                    | B6   | 1.378(2) |
| O13                                                    | B7   | 1.378(2) |
| O14                                                    | B1   | 1.460(3) |
| ----                                                   |      |          |
| <sup>1</sup> 3/2-x,1/2-y,1-z; <sup>2</sup> 1-x,1-y,1-z |      |          |

**Table S4:** Bond Angles in ° for **MAB6**.

| Atom             | Atom | Atom             | Angle/°  |
|------------------|------|------------------|----------|
| O21 <sup>1</sup> | Ni1  | O21              | 180.0    |
| N1 <sup>1</sup>  | Ni1  | O21 <sup>1</sup> | 87.2(6)  |
| N1 <sup>1</sup>  | Ni1  | O21              | 92.8(6)  |
| N1               | Ni1  | O21              | 87.2(6)  |
| N1               | Ni1  | O21 <sup>1</sup> | 92.8(6)  |
| N1 <sup>1</sup>  | Ni1  | N1               | 180.0    |
| N2               | Ni1  | O21 <sup>1</sup> | 91.7(4)  |
| N2               | Ni1  | O21              | 88.3(4)  |
| N2 <sup>1</sup>  | Ni1  | O21              | 91.7(4)  |
| N2 <sup>1</sup>  | Ni1  | O21 <sup>1</sup> | 88.3(4)  |
| N2               | Ni1  | N1 <sup>1</sup>  | 98.5(2)  |
| N2               | Ni1  | N1               | 81.5(2)  |
| N2 <sup>1</sup>  | Ni1  | N1               | 98.5(2)  |
| N2 <sup>1</sup>  | Ni1  | N1 <sup>1</sup>  | 81.5(2)  |
| N2               | Ni1  | N2 <sup>1</sup>  | 180.0    |
| N1B              | Ni1  | O21              | 86.8(9)  |
| N2B <sup>1</sup> | Ni1  | O21              | 96.9(6)  |
| N2B              | Ni1  | O21              | 83.1(6)  |
| N2B <sup>1</sup> | Ni1  | N1B              | 95.3(3)  |
| N2B              | Ni1  | N1B              | 84.7(3)  |
| C1               | N1   | Ni1              | 110.2(7) |
| C2               | N2   | Ni1              | 108.5(6) |

| Atom | Atom | Atom | Angle/°   |
|------|------|------|-----------|
| N1   | C1   | C2   | 108.7(7)  |
| N1   | C1   | C6   | 113.2(7)  |
| C6   | C1   | C2   | 109.6(6)  |
| N2   | C2   | C1   | 108.0(6)  |
| N2   | C2   | C3   | 113.0(6)  |
| C1   | C2   | C3   | 110.8(5)  |
| C4   | C3   | C2   | 110.7(7)  |
| C5   | C4   | C3   | 110.4(6)  |
| C4   | C5   | C6   | 112.6(6)  |
| C1   | C6   | C5   | 111.0(7)  |
| C1B  | N1B  | Ni1  | 107.8(12) |
| C2B  | N2B  | Ni1  | 108.6(11) |
| N1B  | C1B  | C2B  | 108.1(10) |
| N1B  | C1B  | C6B  | 114.4(11) |
| C6B  | C1B  | C2B  | 111.9(7)  |
| N2B  | C2B  | C1B  | 106.4(9)  |
| N2B  | C2B  | C3B  | 112.5(10) |
| C1B  | C2B  | C3B  | 109.4(8)  |
| C4B  | C3B  | C2B  | 110.7(8)  |
| C5B  | C4B  | C3B  | 111.7(9)  |
| C4B  | C5B  | C6B  | 111.8(9)  |
| C1B  | C6B  | C5B  | 111.9(8)  |

| Atom              | Atom | Atom              | Angle/°   | Atom | Atom | Atom | Angle/°                                                |
|-------------------|------|-------------------|-----------|------|------|------|--------------------------------------------------------|
| N11 <sup>2</sup>  | Ni2  | N11               | 180.0(4)  | B1   | O1   | B2   | 119.27(13)                                             |
| N11 <sup>2</sup>  | Ni2  | N11B <sup>2</sup> | 3.9(7)    | B3   | O1   | B1   | 119.66(13)                                             |
| N11               | Ni2  | N11B <sup>2</sup> | 176.1(7)  | B3   | O1   | B2   | 110.75(13)                                             |
| N11               | Ni2  | N12B <sup>2</sup> | 90.3(4)   | B4   | O2   | B2   | 123.03(14)                                             |
| N11 <sup>2</sup>  | Ni2  | N12B <sup>2</sup> | 89.7(4)   | B4   | O3   | B1   | 120.24(15)                                             |
| N12               | Ni2  | N11 <sup>2</sup>  | 92.1(2)   | B5   | O4   | B3   | 122.25(14)                                             |
| N12 <sup>2</sup>  | Ni2  | N11               | 92.1(2)   | B5   | O5   | B1   | 120.87(15)                                             |
| N12 <sup>2</sup>  | Ni2  | N11 <sup>2</sup>  | 87.9(2)   | B6   | O6   | B2   | 120.84(14)                                             |
| N12               | Ni2  | N11               | 87.9(2)   | B6   | O7   | B3   | 119.18(14)                                             |
| N12               | Ni2  | N12 <sup>2</sup>  | 180.0     | B7   | O8   | B2   | 120.15(14)                                             |
| N12               | Ni2  | N11B <sup>2</sup> | 95.8(4)   | B7   | O9   | B3   | 121.16(14)                                             |
| N12 <sup>2</sup>  | Ni2  | N11B <sup>2</sup> | 84.2(4)   | O3   | B1   | O1   | 107.21(14)                                             |
| N12               | Ni2  | N12B <sup>2</sup> | 173.0(8)  | O3   | B1   | O5   | 111.44(15)                                             |
| N12 <sup>2</sup>  | Ni2  | N12B <sup>2</sup> | 7.0(8)    | O3   | B1   | O14  | 107.89(15)                                             |
| N11B <sup>2</sup> | Ni2  | N11B              | 180.0     | O5   | B1   | O1   | 106.10(14)                                             |
| N11B              | Ni2  | N12B <sup>2</sup> | 94.1(5)   | O14  | B1   | O1   | 112.15(15)                                             |
| N11B              | Ni2  | N12B              | 85.9(5)   | O14  | B1   | O5   | 112.00(15)                                             |
| N11B <sup>2</sup> | Ni2  | N12B <sup>2</sup> | 85.9(5)   | O2   | B2   | O1   | 109.20(14)                                             |
| N11B <sup>2</sup> | Ni2  | N12B              | 94.1(5)   | O2   | B2   | O6   | 112.02(15)                                             |
| N12B              | Ni2  | N12B <sup>2</sup> | 180.0     | O2   | B2   | O8   | 109.93(14)                                             |
| C11               | N11  | Ni2               | 109.7(6)  | O6   | B2   | O1   | 108.09(14)                                             |
| C12               | N12  | Ni2               | 108.8(5)  | O6   | B2   | O8   | 111.03(15)                                             |
| N11               | C11  | C12               | 105.6(6)  | O8   | B2   | O1   | 106.37(14)                                             |
| N11               | C11  | C16               | 112.6(6)  | O4   | B3   | O1   | 110.09(14)                                             |
| C12               | C11  | C16               | 109.3(4)  | O4   | B3   | O7   | 110.83(14)                                             |
| N12               | C12  | C11               | 107.0(5)  | O4   | B3   | O9   | 110.13(14)                                             |
| N12               | C12  | C13               | 115.8(4)  | O7   | B3   | O1   | 107.09(14)                                             |
| C11               | C12  | C13               | 110.5(4)  | O9   | B3   | O1   | 107.05(14)                                             |
| C14               | C13  | C12               | 108.0(4)  | O9   | B3   | O7   | 111.53(14)                                             |
| C15               | C14  | C13               | 111.9(4)  | O2   | B4   | O3   | 122.85(17)                                             |
| C14               | C15  | C16               | 111.2(4)  | O2   | B4   | O10  | 122.49(17)                                             |
| C11               | C16  | C15               | 108.7(5)  | O10  | B4   | O3   | 114.61(17)                                             |
| C11B              | N11B | Ni2               | 109.0(13) | O4   | B5   | O5   | 123.57(17)                                             |
| C12B              | N12B | Ni2               | 111.0(11) | O4   | B5   | O11  | 116.73(16)                                             |
| N11B              | C11B | C12B              | 109.1(11) | O5   | B5   | O11  | 119.70(17)                                             |
| N11B              | C11B | C16B              | 116.6(12) | O6   | B6   | O7   | 122.92(17)                                             |
| C12B              | C11B | C16B              | 114.6(10) | O6   | B6   | O12  | 117.13(16)                                             |
| N12B              | C12B | C11B              | 107.6(9)  | O7   | B6   | O12  | 119.94(16)                                             |
| N12B              | C12B | C13B              | 113.0(11) | O8   | B7   | O9   | 122.20(17)                                             |
| C11B              | C12B | C13B              | 109.8(11) | O8   | B7   | O13  | 117.25(16)                                             |
| C14B              | C13B | C12B              | 107.0(10) | O9   | B7   | O13  | 120.54(16)                                             |
| C15B              | C14B | C13B              | 113.1(12) | ---- |      |      |                                                        |
| C14B              | C15B | C16B              | 113.8(11) |      |      |      | <sup>13</sup> /2-x,1/2-y,1-z; <sup>21</sup> -x,1-y,1-z |
| C11B              | C16B | C15B              | 107.8(9)  |      |      |      |                                                        |

**Table S5:** Torsion Angles in ° for **MAB6**.

| Atom | Atom | Atom | Atom | Angle/°   |
|------|------|------|------|-----------|
| Ni1  | N1   | C1   | C2   | -35.0(12) |
| Ni1  | N1   | C1   | C6   | -157.0(8) |
| Ni1  | N2   | C2   | C1   | -44.6(8)  |
| Ni1  | N2   | C2   | C3   | -167.5(7) |
| Ni1  | N1B  | C1B  | C2B  | 39.8(18)  |
| Ni1  | N1B  | C1B  | C6B  | 165.2(11) |
| Ni1  | N2B  | C2B  | C1B  | 41.8(13)  |
| Ni1  | N2B  | C2B  | C3B  | 161.6(11) |
| N1   | C1   | C2   | N2   | 53.0(10)  |
| N1   | C1   | C2   | C3   | 177.3(10) |
| N1   | C1   | C6   | C5   | 177.8(10) |
| N2   | C2   | C3   | C4   | 179.7(9)  |
| C1   | C2   | C3   | C4   | 58.3(12)  |

| Atom             | Atom | Atom | Atom | Angle/°     |
|------------------|------|------|------|-------------|
| C2               | C1   | C6   | C5   | 56.3(11)    |
| C2               | C3   | C4   | C5   | -55.5(12)   |
| C3               | C4   | C5   | C6   | 54.2(10)    |
| C4               | C5   | C6   | C1   | -55.3(12)   |
| C6               | C1   | C2   | N2   | 177.2(7)    |
| C6               | C1   | C2   | C3   | -58.5(9)    |
| N1B              | C1B  | C2B  | N2B  | -54.3(17)   |
| N1B              | C1B  | C2B  | C3B  | -176.1(15)  |
| N1B              | C1B  | C6B  | C5B  | -177.6(15)  |
| N2B              | C2B  | C3B  | C4B  | -176.0(13)  |
| C1B              | C2B  | C3B  | C4B  | -58.0(17)   |
| C2B              | C1B  | C6B  | C5B  | -54.2(14)   |
| C2B              | C3B  | C4B  | C5B  | 57.1(18)    |
| C3B              | C4B  | C5B  | C6B  | -53.6(15)   |
| C4B              | C5B  | C6B  | C1B  | 52.0(16)    |
| C6B              | C1B  | C2B  | N2B  | 178.8(11)   |
| C6B              | C1B  | C2B  | C3B  | 57.0(12)    |
| Ni2              | N11  | C11  | C12  | -36.3(10)   |
| Ni2              | N11  | C11  | C16  | -155.5(6)   |
| Ni2              | N12  | C12  | C11  | -40.0(5)    |
| Ni2              | N12  | C12  | C13  | -163.6(5)   |
| Ni2              | N11B | C11B | C12B | 41(2)       |
| Ni2              | N11B | C11B | C16B | 172.8(16)   |
| Ni2              | N12B | C12B | C11B | 27.3(15)    |
| Ni2              | N12B | C12B | C13B | 148.7(14)   |
| N11              | Ni2  | N12  | C12  | 16.0(6)     |
| N11 <sup>1</sup> | Ni2  | N12  | C12  | -164.0(6)   |
| N11              | C11  | C12  | N12  | 49.1(7)     |
| N11              | C11  | C12  | C13  | 175.9(7)    |
| N11              | C11  | C16  | C15  | 177.2(8)    |
| N12              | C12  | C13  | C14  | -179.0(6)   |
| C11              | C12  | C13  | C14  | 59.2(7)     |
| C12              | C11  | C16  | C15  | 60.2(6)     |
| C12              | C13  | C14  | C15  | -56.2(8)    |
| C13              | C14  | C15  | C16  | 56.8(7)     |
| C14              | C15  | C16  | C11  | -57.6(7)    |
| C16              | C11  | C12  | N12  | 170.4(5)    |
| C16              | C11  | C12  | C13  | -62.7(6)    |
| N11B             | C11B | C12B | N12B | -44.3(19)   |
| N11B             | C11B | C12B | C13B | -167.7(17)  |
| N11B             | C11B | C16B | C15B | 177.6(19)   |
| N12B             | C12B | C13B | C14B | -178.2(15)  |
| C11B             | C12B | C13B | C14B | -58.0(19)   |
| C12B             | C11B | C16B | C15B | -53(2)      |
| C12B             | C13B | C14B | C15B | 58(2)       |
| C13B             | C14B | C15B | C16B | -56.4(19)   |
| C14B             | C15B | C16B | C11B | 51(2)       |
| C16B             | C11B | C12B | N12B | -177.1(14)  |
| C16B             | C11B | C12B | C13B | 59.4(15)    |
| B1               | O1   | B2   | O2   | -34.2(2)    |
| B1               | O1   | B2   | O6   | 87.86(18)   |
| B1               | O1   | B2   | O8   | -152.84(14) |
| B1               | O1   | B3   | O4   | 36.9(2)     |
| B1               | O1   | B3   | O7   | -83.69(18)  |
| B1               | O1   | B3   | O9   | 156.58(14)  |
| B1               | O3   | B4   | O2   | 1.0(3)      |
| B1               | O3   | B4   | O10  | -176.44(16) |
| B1               | O5   | B5   | O4   | -2.5(3)     |
| B1               | O5   | B5   | O11  | 176.53(16)  |
| B2               | O1   | B1   | O3   | 49.8(2)     |
| B2               | O1   | B1   | O5   | 168.98(14)  |
| B2               | O1   | B1   | O14  | -68.45(19)  |

| Atom | Atom | Atom | Atom | Angle/°     |
|------|------|------|------|-------------|
| B2   | O1   | B3   | O4   | -178.30(14) |
| B2   | O1   | B3   | O7   | 61.13(17)   |
| B2   | O1   | B3   | O9   | -58.60(17)  |
| B2   | O2   | B4   | O3   | 18.0(3)     |
| B2   | O2   | B4   | O10  | -164.80(17) |
| B2   | O6   | B6   | O7   | 7.5(3)      |
| B2   | O6   | B6   | O12  | -171.63(16) |
| B2   | O8   | B7   | O9   | 0.2(3)      |
| B2   | O8   | B7   | O13  | 179.68(16)  |
| B3   | O1   | B1   | O3   | -168.35(14) |
| B3   | O1   | B1   | O5   | -49.2(2)    |
| B3   | O1   | B1   | O14  | 73.41(19)   |
| B3   | O1   | B2   | O2   | -179.21(14) |
| B3   | O1   | B2   | O6   | -57.11(17)  |
| B3   | O1   | B2   | O8   | 62.19(17)   |
| B3   | O4   | B5   | O5   | -13.4(3)    |
| B3   | O4   | B5   | O11  | 167.63(16)  |
| B3   | O7   | B6   | O6   | -2.8(3)     |
| B3   | O7   | B6   | O12  | 176.28(16)  |
| B3   | O9   | B7   | O8   | 3.8(3)      |
| B3   | O9   | B7   | O13  | -175.64(16) |
| B4   | O2   | B2   | O1   | -0.7(2)     |
| B4   | O2   | B2   | O6   | -120.42(18) |
| B4   | O2   | B2   | O8   | 115.63(18)  |
| B4   | O3   | B1   | O1   | -31.9(2)    |
| B4   | O3   | B1   | O5   | -147.54(16) |
| B4   | O3   | B1   | O14  | 89.12(19)   |
| B5   | O4   | B3   | O1   | -3.9(2)     |
| B5   | O4   | B3   | O7   | 114.43(18)  |
| B5   | O4   | B3   | O9   | -121.68(17) |
| B5   | O5   | B1   | O1   | 30.8(2)     |
| B5   | O5   | B1   | O3   | 147.20(16)  |
| B5   | O5   | B1   | O14  | -91.83(19)  |
| B6   | O6   | B2   | O1   | 22.5(2)     |
| B6   | O6   | B2   | O2   | 142.83(16)  |
| B6   | O6   | B2   | O8   | -93.84(19)  |
| B6   | O7   | B3   | O1   | -31.0(2)    |
| B6   | O7   | B3   | O4   | -151.07(15) |
| B6   | O7   | B3   | O9   | 85.84(18)   |
| B7   | O8   | B2   | O1   | -32.2(2)    |
| B7   | O8   | B2   | O2   | -150.32(16) |
| B7   | O8   | B2   | O6   | 85.16(19)   |
| B7   | O9   | B3   | O1   | 25.3(2)     |
| B7   | O9   | B3   | O4   | 144.96(16)  |
| B7   | O9   | B3   | O7   | -91.55(18)  |

-----  
<sup>1</sup>1-x,1-y,1-z

**Table S6:** Hydrogen Fractional Atomic Coordinates ( $\times 10^4$ ) and Equivalent Isotropic Displacement Parameters ( $\text{\AA}^2 \times 10^3$ ) for **MAB6**.  $U_{eq}$  is defined as 1/3 of the trace of the orthogonalised  $U_{ij}$ .

| Atom | x       | y       | z       | $U_{eq}$ |
|------|---------|---------|---------|----------|
| H21A | 8349.09 | 1002.86 | 4930.42 | 35       |
| H21B | 8364.06 | 999.19  | 5544.41 | 35       |
| H1A  | 7337.05 | 2877.01 | 6051.43 | 27       |
| H1B  | 7953.74 | 2284.99 | 6171.55 | 27       |
| H2A  | 8308.81 | 3979.7  | 4803.79 | 24       |
| H2B  | 7803.25 | 4728.53 | 4907.9  | 24       |
| H1   | 7684.66 | 4719.87 | 5998.42 | 27       |
| H2   | 8775.21 | 3632.21 | 5799.04 | 29       |
| H3A  | 9026.44 | 5613.32 | 5540.83 | 41       |

| Atom | x       | y       | z       | $U_{eq}$ |
|------|---------|---------|---------|----------|
| H3B  | 8423.4  | 6152.43 | 5690.85 | 41       |
| H4A  | 9491.09 | 5080.12 | 6577.89 | 50       |
| H4B  | 9311.21 | 6491.88 | 6546.7  | 50       |
| H5A  | 8414.52 | 6083.98 | 6825.42 | 53       |
| H5B  | 8998.82 | 5466.3  | 7321.67 | 53       |
| H6A  | 8714.26 | 3541.38 | 6877.82 | 47       |
| H6B  | 8119.29 | 4118.09 | 7027.77 | 47       |
| H1BA | 7354.13 | 3184.09 | 5990.94 | 26       |
| H1BB | 7773.88 | 2118.08 | 6128.64 | 26       |
| H2BA | 8472.36 | 3608.9  | 5007.51 | 25       |
| H2BB | 7935.42 | 4391.49 | 4693.88 | 25       |
| H1BC | 8623.59 | 3141.83 | 6130.91 | 28       |
| H2BC | 7803.2  | 5102.84 | 5560.99 | 32       |
| H3BA | 9141.89 | 4890.47 | 5781.68 | 37       |
| H3BB | 8725.71 | 6014.6  | 5440.93 | 37       |
| H4BA | 9252.36 | 6509    | 6484.76 | 48       |
| H4BB | 8507.37 | 6571.67 | 6352.04 | 48       |
| H5BA | 8930.01 | 5545.31 | 7272.24 | 54       |
| H5BB | 9302.81 | 4634.29 | 6962.25 | 54       |
| H6BA | 8422.33 | 3594.94 | 7048.07 | 30       |
| H6BB | 7966.14 | 4685.72 | 6730.81 | 30       |
| H11A | 4574.45 | 4849.32 | 5830.67 | 25       |
| H11B | 5261.54 | 4717.3  | 6077.1  | 25       |
| H12A | 5602.26 | 6708.99 | 4902.11 | 20       |
| H12B | 4957.58 | 7121.72 | 4837.7  | 20       |
| H11  | 4586.13 | 6862.44 | 5831.15 | 26       |
| H12  | 5891.08 | 6627.34 | 5914.3  | 27       |
| H13A | 5843.29 | 8727.37 | 5648.15 | 34       |
| H13B | 5124.79 | 8780.19 | 5646.74 | 34       |
| H14A | 6179.2  | 8232.11 | 6704.08 | 43       |
| H14B | 5775.56 | 9455.87 | 6616.95 | 43       |
| H15A | 4896.54 | 8377.38 | 6690.31 | 44       |
| H15B | 5479.24 | 8102.05 | 7284.82 | 44       |
| H16A | 5652.75 | 6209.14 | 6861.31 | 37       |
| H16B | 4942.81 | 6257.28 | 6885.3  | 37       |
| H11C | 4539.33 | 5331.35 | 5810.25 | 25       |
| H11D | 5124.64 | 4637.5  | 6067.12 | 25       |
| H12C | 5577.42 | 6871.58 | 4963.67 | 20       |
| H12D | 4907.16 | 7117.73 | 4661.54 | 20       |
| H11E | 5740.06 | 6215.71 | 6147.85 | 39       |
| H12E | 4699.23 | 7654.62 | 5488.36 | 43       |
| H13C | 6030.34 | 8184.98 | 5828.67 | 64       |
| H13D | 5489.72 | 9085.27 | 5440.15 | 64       |
| H14C | 5795.97 | 9632.66 | 6498.31 | 80       |
| H14D | 5072.85 | 9243.35 | 6270.99 | 80       |
| H15C | 5553.98 | 8372.19 | 7220.3  | 81       |
| H15D | 6080.4  | 7769.5  | 6971.58 | 81       |
| H16C | 5376.84 | 6224.14 | 6995.07 | 67       |
| H16D | 4784.69 | 7043.98 | 6637.91 | 67       |
| H10  | 6847.37 | 6842.54 | 5304.56 | 25       |
| H11F | 5005    | 6447.84 | 1956.5  | 25       |
| H12F | 7950.21 | 3434.16 | 2959.91 | 24       |
| H13  | 7895.49 | 9392.56 | 2950.73 | 26       |
| H14  | 6339.02 | 4084.83 | 3110.83 | 28       |
| H22A | 3736.34 | 6360.23 | 4033.62 | 46       |
| H22B | 3436.44 | 5237.63 | 3959.84 | 46       |
| H23A | 8929.92 | 3328.72 | 3832.16 | 41       |
| H23B | 9395.22 | 2616.81 | 3716.06 | 41       |

**Table S7:** Hydrogen Bond information for **MAB6**.

| D    | H    | A                 | d(D-H)/Å | d(H-A)/Å | d(D-A)/Å   | D-H-A/deg |
|------|------|-------------------|----------|----------|------------|-----------|
| O21  | H21A | O22 <sup>1</sup>  | 0.86     | 1.93     | 2.697(2)   | 148.0     |
| O21  | H21B | O3 <sup>2</sup>   | 0.86     | 2.52     | 3.213(2)   | 139.0     |
| O21  | H21B | O14 <sup>2</sup>  | 0.86     | 2.19     | 2.981(2)   | 152.8     |
| N1   | H1A  | O22 <sup>3</sup>  | 0.91     | 2.55     | 3.25(2)    | 134.2     |
| N1   | H1B  | O14 <sup>2</sup>  | 0.91     | 2.30     | 3.20(2)    | 167.7     |
| N2   | H2B  | O2                | 0.91     | 2.20     | 3.100(12)  | 171.6     |
| N2   | H2B  | O6                | 0.91     | 2.49     | 2.938(10)  | 110.9     |
| N1B  | H1BA | O22 <sup>3</sup>  | 0.91     | 2.41     | 3.27(3)    | 158.3     |
| N1B  | H1BB | O14 <sup>2</sup>  | 0.91     | 2.42     | 3.19(3)    | 141.9     |
| N2B  | H2BB | O2                | 0.91     | 2.58     | 3.288(19)  | 135.4     |
| N2B  | H2BB | O6                | 0.91     | 2.11     | 2.985(16)  | 161.4     |
| N11  | H11A | O3 <sup>3</sup>   | 0.91     | 2.06     | 2.963(13)  | 170.6     |
| N11  | H11B | O11 <sup>4</sup>  | 0.91     | 2.28     | 3.002(12)  | 135.7     |
| N12  | H12A | O10               | 0.91     | 2.00     | 2.821(9)   | 148.6     |
| N12  | H12B | O23 <sup>5</sup>  | 0.91     | 2.26     | 3.11(2)    | 157.0     |
| N11B | H11C | O3 <sup>3</sup>   | 0.91     | 2.31     | 3.02(3)    | 134.3     |
| N11B | H11D | O11 <sup>4</sup>  | 0.91     | 2.21     | 3.08(3)    | 158.1     |
| N12B | H12C | O10               | 0.91     | 2.11     | 2.99(2)    | 162.1     |
| N12B | H12D | O23 <sup>5</sup>  | 0.91     | 1.96     | 2.87(3)    | 174.1     |
| O10  | H10  | O8 <sup>6</sup>   | 0.84     | 1.93     | 2.6937(18) | 150.2     |
| O11  | H11F | O5 <sup>7</sup>   | 0.84     | 1.87     | 2.7105(19) | 174.0     |
| O12  | H12F | O9 <sup>8</sup>   | 0.84     | 1.94     | 2.7702(18) | 169.1     |
| O13  | H13  | O7 <sup>9</sup>   | 0.84     | 1.86     | 2.6896(18) | 171.2     |
| O22  | H22A | O23 <sup>5</sup>  | 0.85     | 2.05     | 2.837      | 153.2     |
| O22  | H22B | O13 <sup>10</sup> | 0.85     | 1.96     | 2.809(2)   | 174.7     |
| O23  | H23A | O12               | 0.85     | 1.99     | 2.7955(19) | 157.3     |
| O23  | H23B | O11 <sup>8</sup>  | 0.85     | 1.98     | 2.8107(19) | 165.2     |

-----  
<sup>1</sup>1/2+x,-1/2+y,+z; <sup>2</sup>3/2-x,1/2-y,1-z; <sup>3</sup>1-x,1-y,1-z; <sup>4</sup>+x,1-y,1/2+z; <sup>5</sup>-1/2+x,1/2+y,+z; <sup>6</sup>3/2-x,3/2-y,1-z; <sup>7</sup>1-x,y,1/2-z; <sup>8</sup>3/2-x,-1/2+y,1/2-z; <sup>9</sup>3/2-x,1/2+y,1/2-z; <sup>10</sup>-1/2+x,-1/2+y,+z

**Table S8:** Atomic Occupancies for all atoms that are not fully occupied in **MAB6**.

| Atom | Occupancy | Atom | Occupancy | Atom | Occupancy | Atom | Occupancy |
|------|-----------|------|-----------|------|-----------|------|-----------|
| N1   | 0.602(8)  | N1B  | 0.398(8)  | N11  | 0.680(7)  | N11B | 0.320(7)  |
| H1A  | 0.602(8)  | H1BA | 0.398(8)  | H11A | 0.680(7)  | H11C | 0.320(7)  |
| H1B  | 0.602(8)  | H1BB | 0.398(8)  | H11B | 0.680(7)  | H11D | 0.320(7)  |
| N2   | 0.602(8)  | N2B  | 0.398(8)  | N12  | 0.680(7)  | N12B | 0.320(7)  |
| H2A  | 0.602(8)  | H2BA | 0.398(8)  | H12A | 0.680(7)  | H12C | 0.320(7)  |
| H2B  | 0.602(8)  | H2BB | 0.398(8)  | H12B | 0.680(7)  | H12D | 0.320(7)  |
| C1   | 0.602(8)  | C1B  | 0.398(8)  | C11  | 0.680(7)  | C11B | 0.320(7)  |
| H1   | 0.602(8)  | H1BC | 0.398(8)  | H11  | 0.680(7)  | H11E | 0.320(7)  |
| C2   | 0.602(8)  | C2B  | 0.398(8)  | C12  | 0.680(7)  | C12B | 0.320(7)  |
| H2   | 0.602(8)  | H2BC | 0.398(8)  | H12  | 0.680(7)  | H12E | 0.320(7)  |
| C3   | 0.602(8)  | C3B  | 0.398(8)  | C13  | 0.680(7)  | C13B | 0.320(7)  |
| H3A  | 0.602(8)  | H3BA | 0.398(8)  | H13A | 0.680(7)  | H13C | 0.320(7)  |
| H3B  | 0.602(8)  | H3BB | 0.398(8)  | H13B | 0.680(7)  | H13D | 0.320(7)  |
| C4   | 0.602(8)  | C4B  | 0.398(8)  | C14  | 0.680(7)  | C14B | 0.320(7)  |
| H4A  | 0.602(8)  | H4BA | 0.398(8)  | H14A | 0.680(7)  | H14C | 0.320(7)  |
| H4B  | 0.602(8)  | H4BB | 0.398(8)  | H14B | 0.680(7)  | H14D | 0.320(7)  |
| C5   | 0.602(8)  | C5B  | 0.398(8)  | C15  | 0.680(7)  | C15B | 0.320(7)  |
| H5A  | 0.602(8)  | H5BA | 0.398(8)  | H15A | 0.680(7)  | H15C | 0.320(7)  |
| H5B  | 0.602(8)  | H5BB | 0.398(8)  | H15B | 0.680(7)  | H15D | 0.320(7)  |
| C6   | 0.602(8)  | C6B  | 0.398(8)  | C16  | 0.680(7)  | C16B | 0.320(7)  |
| H6A  | 0.602(8)  | H6BA | 0.398(8)  | H16A | 0.680(7)  | H16C | 0.320(7)  |
| H6B  | 0.602(8)  | H6BB | 0.398(8)  | H16B | 0.680(7)  | H16D | 0.320(7)  |



## Compound 7

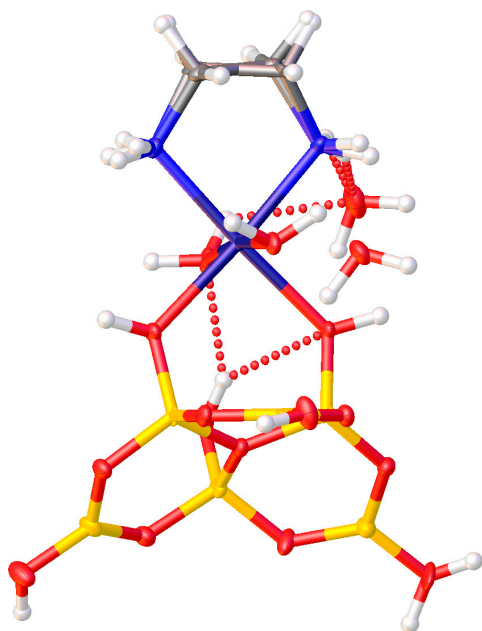

**Crystal Data.**  $\text{C}_2\text{H}_{20}\text{B}_6\text{N}_2\text{NiO}_{16}$ ,  $M_r = 451.77$ , triclinic,  $P-1$  (No. 2),  $a = 8.5116(7)$  Å,  $b = 9.7946(5)$  Å,  $c = 9.8073(8)$  Å,  $\alpha = 89.873(5)^\circ$ ,  $\beta = 82.901(7)^\circ$ ,  $\gamma = 74.372(6)^\circ$ ,  $V = 780.94(10)$  Å<sup>3</sup>,  $T = 100(2)$  K,  $Z = 2$ ,  $Z' = 1$ ,  $\mu(\text{Mo K}\alpha) = 1.333$ , 5883 reflections measured, 5883 unique ( $R_{\text{int}} = .$ ) which were used in all calculations. The final  $wR_2$  was 0.1902 (all data) and  $R_1$  was 0.0682 ( $I \geq 2 \sigma(I)$ ).

| Compound                              | MAB7                                                         |
|---------------------------------------|--------------------------------------------------------------|
| Formula                               | $\text{C}_2\text{H}_{20}\text{B}_6\text{N}_2\text{NiO}_{16}$ |
| $D_{\text{calc.}} / \text{g cm}^{-3}$ | 1.921                                                        |
| $\mu / \text{mm}^{-1}$                | 1.333                                                        |
| Formula Weight                        | 451.77                                                       |
| Colour                                | light blue                                                   |
| Shape                                 | blade-shaped                                                 |
| Size/ $\text{mm}^3$                   | $0.13 \times 0.03 \times 0.01$                               |
| $T / \text{K}$                        | 100(2)                                                       |
| Crystal System                        | triclinic                                                    |
| Space Group                           | $P-1$                                                        |
| $a / \text{\AA}$                      | 8.5116(7)                                                    |
| $b / \text{\AA}$                      | 9.7946(5)                                                    |
| $c / \text{\AA}$                      | 9.8073(8)                                                    |
| $\alpha / ^\circ$                     | 89.873(5)                                                    |
| $\beta / ^\circ$                      | 82.901(7)                                                    |
| $\gamma / ^\circ$                     | 74.372(6)                                                    |
| $V / \text{\AA}^3$                    | 780.94(10)                                                   |
| $Z$                                   | 2                                                            |
| $Z'$                                  | 1                                                            |
| Wavelength/ $\text{\AA}$              | 0.71075                                                      |
| Radiation type                        | Mo $\text{K}\alpha$                                          |
| $\Theta_{\text{min}} / ^\circ$        | 2.094                                                        |
| $\Theta_{\text{max}} / ^\circ$        | 27.573                                                       |
| Measured Refl's.                      | 5883                                                         |
| Indep't Refl's                        | 5883                                                         |
| Refl's $I \geq 2 \sigma(I)$           | 5320                                                         |
| $R_{\text{int}}$                      | .                                                            |
| Parameters                            | 291                                                          |
| Restraints                            | 277                                                          |
| Largest Peak                          | 1.859                                                        |
| Deepest Hole                          | -0.863                                                       |
| GooF                                  | 1.022                                                        |
| $wR_2$ (all data)                     | 0.1902                                                       |
| $wR_2$                                | 0.1834                                                       |
| $R_1$ (all data)                      | 0.0744                                                       |
| $R_1$                                 | 0.0682                                                       |

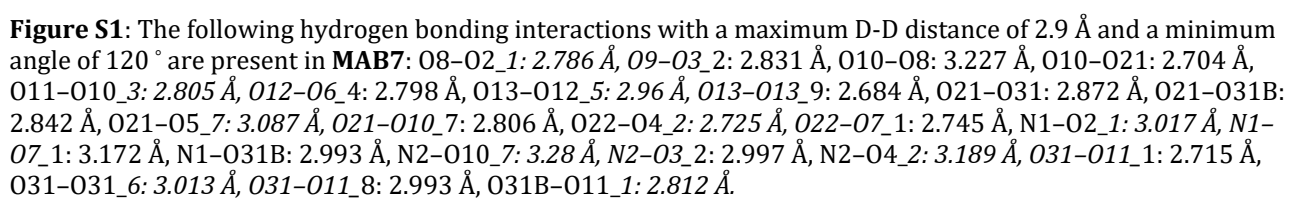

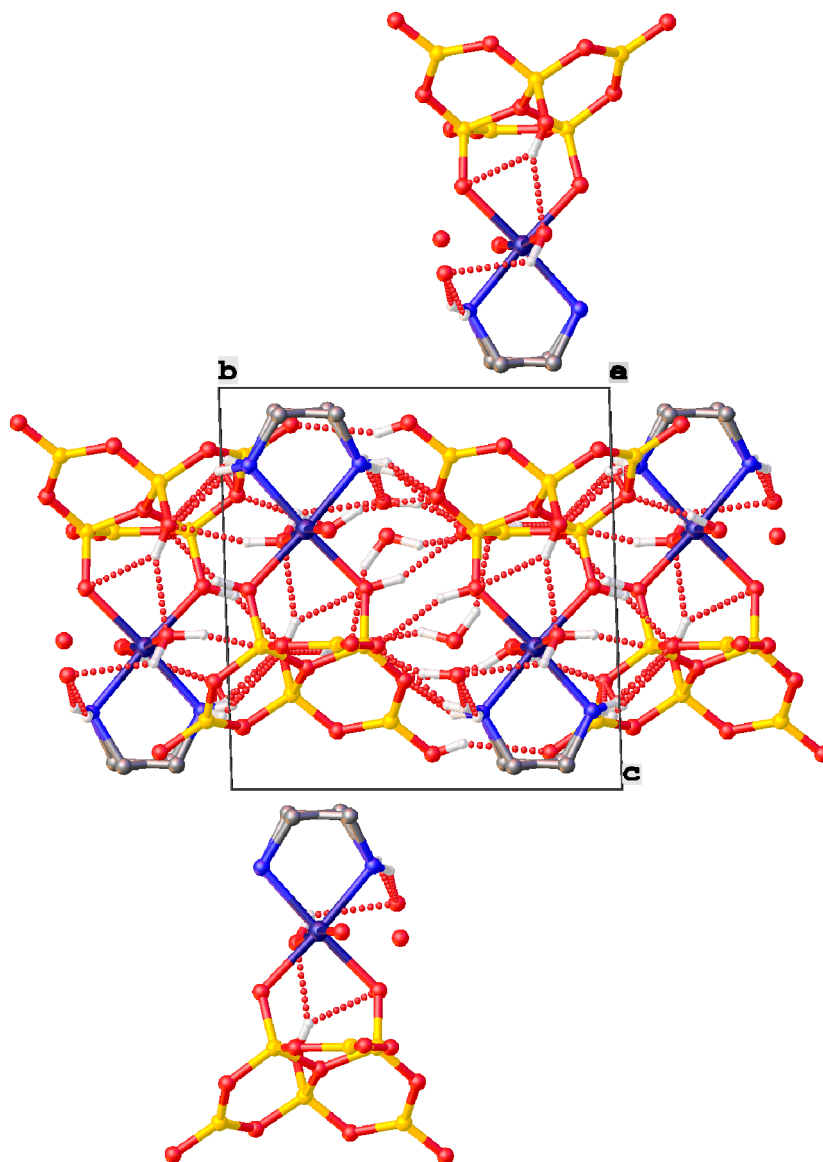

**Figure S2:** Packing diagram of MAB7.

**Table S1:** Fractional Atomic Coordinates ( $\times 10^4$ ) and Equivalent Isotropic Displacement Parameters ( $\text{\AA}^2 \times 10^3$ ) for MAB7.  $U_{eq}$  is defined as 1/3 of the trace of the orthogonalised  $U_{ij}$ .

| Atom | x         | y         | z         | $U_{eq}$ |
|------|-----------|-----------|-----------|----------|
| Ni1  | 3411.1(7) | 7892.1(6) | 3529.8(5) | 11.8(2)  |
| O1   | 2858(4)   | 7982(4)   | 6965(3)   | 12.4(6)  |
| O2   | 5418(4)   | 6162(3)   | 6430(4)   | 13.5(7)  |
| O3   | 5433(4)   | 8592(3)   | 6432(4)   | 14.0(7)  |
| O4   | 3060(4)   | 10371(4)  | 7323(3)   | 13.8(7)  |
| O5   | 760(5)    | 9677(4)   | 8449(4)   | 16.2(7)  |
| O6   | 829(5)    | 7254(4)   | 8545(4)   | 20.6(8)  |
| O7   | 3018(4)   | 5494(4)   | 7286(3)   | 13.9(6)  |
| O8   | 3228(4)   | 6420(3)   | 5009(4)   | 13.1(7)  |
| O9   | 3203(5)   | 9420(3)   | 5040(4)   | 13.7(7)  |
| O10  | -32(4)    | 8606(4)   | 6579(3)   | 15.5(6)  |
| O11  | 7914(4)   | 6824(4)   | 6384(4)   | 21.2(7)  |
| O12  | 1395(5)   | 11810(4)  | 9081(4)   | 23.1(8)  |
| O13  | 1381(6)   | 4835(4)   | 9119(5)   | 30.7(10) |
| O21  | 833(4)    | 8462(4)   | 3825(3)   | 15.3(6)  |

| Atom | x        | y        | z        | $U_{eq}$ |
|------|----------|----------|----------|----------|
| O22  | 5949(4)  | 7314(4)  | 3546(3)  | 15.0(6)  |
| N1   | 3625(6)  | 6458(4)  | 1904(4)  | 15.1(8)  |
| N2   | 3511(6)  | 9299(4)  | 1943(4)  | 15.7(8)  |
| B1   | 3632(7)  | 6496(5)  | 6414(5)  | 12.0(10) |
| B2   | 3651(7)  | 9124(5)  | 6432(6)  | 12.4(10) |
| B3   | 1058(6)  | 8388(6)  | 7638(5)  | 14.2(9)  |
| B4   | 6292(6)  | 7176(6)  | 6406(4)  | 13.6(9)  |
| B5   | 1709(7)  | 10597(6) | 8288(6)  | 16.3(10) |
| B6   | 1732(7)  | 5877(6)  | 8302(5)  | 16.7(10) |
| C1   | 4350(30) | 7017(15) | 668(13)  | 19(4)    |
| C2   | 3520(30) | 8593(12) | 607(12)  | 15(4)    |
| C1B  | 3570(30) | 7243(14) | 567(12)  | 17(3)    |
| C2B  | 4320(30) | 8477(12) | 694(11)  | 15(3)    |
| O31  | -9(14)   | 5820(9)  | 3698(14) | 21(3)    |
| O31B | 387(11)  | 5884(8)  | 2838(14) | 26(3)    |

**Table S2:** Anisotropic Displacement Parameters ( $\times 10^4$ ) for **MAB7**. The anisotropic displacement factor exponent takes the form:  $-2\pi^2[h^2a^{*2} \times U_{11} + \dots + 2hka^* \times b^* \times U_{12}]$

| Atom | $U_{11}$ | $U_{22}$ | $U_{33}$ | $U_{23}$ | $U_{13}$ | $U_{12}$  |
|------|----------|----------|----------|----------|----------|-----------|
| Ni1  | 21.4(3)  | 6.3(3)   | 9.1(3)   | 1.3(3)   | -3.0(2)  | -5.8(3)   |
| O1   | 19.1(15) | 7.9(13)  | 10.9(14) | 1.0(14)  | -2.0(11) | -4.5(13)  |
| O2   | 18.7(17) | 8.8(15)  | 14.2(17) | -0.8(13) | -2.2(13) | -5.6(12)  |
| O3   | 22.1(17) | 7.5(14)  | 14.2(17) | 1.3(13)  | -3.9(13) | -6.4(12)  |
| O4   | 20.5(16) | 10.6(15) | 11.8(15) | -2.2(14) | -0.2(12) | -7.3(13)  |
| O5   | 23.8(18) | 13.1(15) | 12.2(17) | -1.9(13) | -0.8(14) | -6.8(14)  |
| O6   | 26(2)    | 10.2(15) | 21(2)    | 4.7(14)  | 6.9(15)  | -1.7(14)  |
| O7   | 20.2(16) | 9.5(15)  | 11.2(15) | 1.3(15)  | 0.1(12)  | -3.5(14)  |
| O8   | 21.8(17) | 6.6(14)  | 11.6(16) | 0.3(13)  | -3.0(13) | -4.8(12)  |
| O9   | 23.3(17) | 8.3(15)  | 11.2(16) | -0.5(13) | -3.1(13) | -6.9(13)  |
| O10  | 21.6(16) | 11.7(15) | 13.3(15) | 2.3(16)  | -2.4(12) | -4.3(15)  |
| O11  | 18.2(16) | 14.0(15) | 32.7(19) | -5.4(17) | -4.1(14) | -6.1(15)  |
| O12  | 32(2)    | 19.9(18) | 19(2)    | -6.2(16) | 7.3(16)  | -13.9(16) |
| O13  | 56(3)    | 6.8(16)  | 24(2)    | 4.6(16)  | 9(2)     | -6.0(17)  |
| O21  | 21.6(16) | 6.6(14)  | 19.9(16) | 3.5(15)  | -6.8(12) | -5.6(13)  |
| O22  | 22.7(16) | 8.1(14)  | 15.2(15) | -0.4(15) | 0.1(12)  | -6.9(14)  |
| N1   | 27(2)    | 10.4(18) | 9.4(19)  | 2.1(15)  | -5.6(16) | -5.6(16)  |
| N2   | 26(2)    | 9.4(18)  | 13(2)    | 2.1(15)  | -4.3(17) | -6.8(16)  |
| B1   | 21(2)    | 8(2)     | 8(2)     | 3.7(18)  | -0.6(18) | -5.9(18)  |
| B2   | 22(3)    | 4(2)     | 13(2)    | 0.2(19)  | -2.8(19) | -7.1(18)  |
| B3   | 23(2)    | 9(2)     | 12(2)    | 0(2)     | 1.2(17)  | -7(2)     |
| B4   | 21(2)    | 18(2)    | 3.1(19)  | -5(2)    | 1.9(16)  | -8(2)     |
| B5   | 23(3)    | 15(2)    | 12(2)    | -5(2)    | -2.2(19) | -7(2)     |
| B6   | 24(2)    | 11(2)    | 13(2)    | -1(2)    | 2.5(18)  | -4(2)     |
| C1   | 36(10)   | 12(5)    | 8(5)     | -6(4)    | -2(5)    | -5(6)     |
| C2   | 27(10)   | 14(5)    | 5(4)     | 5(3)     | 1(5)     | -7(5)     |
| C1B  | 29(8)    | 15(5)    | 8(4)     | 2(4)     | -3(5)    | -6(5)     |
| C2B  | 19(8)    | 16(5)    | 9(5)     | 3(3)     | 0(4)     | -6(4)     |
| O31  | 32(5)    | 13(4)    | 18(7)    | -6(3)    | -1(4)    | -6(4)     |
| O31B | 31(4)    | 15(4)    | 34(8)    | -6(3)    | -11(4)   | -5(3)     |

**Table S3:** Bond Lengths in Å for **MAB7**.

| Atom | Atom | Length/Å  |
|------|------|-----------|
| Ni1  | O8   | 2.065(3)  |
| Ni1  | O9   | 2.065(3)  |
| Ni1  | O21  | 2.096(3)  |
| Ni1  | O22  | 2.082(3)  |
| Ni1  | N1   | 2.086(4)  |
| Ni1  | N2   | 2.085(4)  |
| O1   | B1   | 1.498(6)  |
| O1   | B2   | 1.515(6)  |
| O1   | B3   | 1.538(6)  |
| O2   | B1   | 1.468(7)  |
| O2   | B4   | 1.391(7)  |
| O3   | B2   | 1.465(7)  |
| O3   | B4   | 1.382(7)  |
| O4   | B2   | 1.441(6)  |
| O4   | B5   | 1.365(6)  |
| O5   | B3   | 1.439(6)  |
| O5   | B5   | 1.360(7)  |
| O6   | B3   | 1.461(6)  |
| O6   | B6   | 1.365(7)  |
| O7   | B1   | 1.460(6)  |
| O7   | B6   | 1.358(6)  |
| O8   | B1   | 1.468(6)  |
| O9   | B2   | 1.470(6)  |
| O10  | B3   | 1.455(6)  |
| O11  | B4   | 1.327(6)  |
| O12  | B5   | 1.367(7)  |
| O13  | B6   | 1.369(7)  |
| N1   | C1   | 1.463(14) |
| N1   | C1B  | 1.517(13) |
| N2   | C2   | 1.481(13) |
| N2   | C2B  | 1.456(12) |
| C1   | C2   | 1.52(2)   |
| C1B  | C2B  | 1.53(2)   |

**Table S4:** Bond Angles in ° for **MAB7**.

| Atom | Atom | Atom | Angle/°    |
|------|------|------|------------|
| O8   | Ni1  | O9   | 90.48(12)  |
| O8   | Ni1  | O21  | 84.85(14)  |
| O8   | Ni1  | O22  | 89.04(14)  |
| O8   | Ni1  | N1   | 93.51(14)  |
| O8   | Ni1  | N2   | 175.70(15) |
| O9   | Ni1  | O21  | 85.55(14)  |
| O9   | Ni1  | O22  | 88.86(14)  |
| O9   | Ni1  | N1   | 176.01(14) |
| O9   | Ni1  | N2   | 93.21(14)  |
| O22  | Ni1  | O21  | 171.67(12) |
| O22  | Ni1  | N1   | 91.39(16)  |
| O22  | Ni1  | N2   | 93.24(16)  |
| N1   | Ni1  | O21  | 94.61(16)  |
| N2   | Ni1  | O21  | 93.23(16)  |
| N2   | Ni1  | N1   | 82.80(14)  |
| B1   | O1   | B2   | 117.7(3)   |
| B1   | O1   | B3   | 119.1(4)   |
| B2   | O1   | B3   | 120.1(4)   |
| B4   | O2   | B1   | 124.1(4)   |
| B4   | O3   | B2   | 124.9(4)   |
| B5   | O4   | B2   | 123.6(4)   |
| B5   | O5   | B3   | 124.4(4)   |
| B6   | O6   | B3   | 122.3(4)   |
| B6   | O7   | B1   | 124.1(4)   |
| B1   | O8   | Ni1  | 124.8(3)   |
| B2   | O9   | Ni1  | 124.8(3)   |
| C1   | N1   | Ni1  | 107.6(5)   |
| C1B  | N1   | Ni1  | 109.2(5)   |
| C2   | N2   | Ni1  | 110.0(5)   |
| C2B  | N2   | Ni1  | 108.2(5)   |
| O2   | B1   | O1   | 108.9(4)   |
| O7   | B1   | O1   | 110.2(4)   |
| O7   | B1   | O2   | 107.8(4)   |
| O7   | B1   | O8   | 111.0(4)   |
| O8   | B1   | O1   | 107.6(4)   |
| O8   | B1   | O2   | 111.2(4)   |
| O3   | B2   | O1   | 108.6(4)   |
| O3   | B2   | O9   | 112.2(4)   |
| O4   | B2   | O1   | 110.0(4)   |
| O4   | B2   | O3   | 108.4(4)   |
| O4   | B2   | O9   | 111.4(4)   |
| O9   | B2   | O1   | 106.3(4)   |
| O5   | B3   | O1   | 108.4(4)   |
| O5   | B3   | O6   | 109.0(4)   |
| O5   | B3   | O10  | 109.9(4)   |
| O6   | B3   | O1   | 108.1(4)   |
| O10  | B3   | O1   | 109.7(3)   |
| O10  | B3   | O6   | 111.7(4)   |
| O3   | B4   | O2   | 118.6(4)   |
| O11  | B4   | O2   | 122.1(5)   |
| O11  | B4   | O3   | 119.3(5)   |
| O4   | B5   | O12  | 114.8(5)   |
| O5   | B5   | O4   | 122.3(5)   |
| O5   | B5   | O12  | 122.9(5)   |
| O6   | B6   | O13  | 120.1(4)   |
| O7   | B6   | O6   | 122.1(5)   |
| O7   | B6   | O13  | 117.8(5)   |
| N1   | C1   | C2   | 109.3(14)  |

| Atom | Atom | Atom | Angle/°   |
|------|------|------|-----------|
| N2   | C2   | C1   | 109.6(14) |
| N1   | C1B  | C2B  | 108.8(12) |
| N2   | C2B  | C1B  | 108.0(13) |

**Table S5:** Torsion Angles in ° for **MAB7**.

| Atom | Atom | Atom | Atom | Angle/°   |
|------|------|------|------|-----------|
| Ni1  | O8   | B1   | O1   | 46.1(5)   |
| Ni1  | O8   | B1   | O2   | -73.1(4)  |
| Ni1  | O8   | B1   | O7   | 166.8(3)  |
| Ni1  | O9   | B2   | O1   | -48.5(5)  |
| Ni1  | O9   | B2   | O3   | 70.0(4)   |
| Ni1  | O9   | B2   | O4   | -168.3(3) |
| Ni1  | N1   | C1   | C2   | -44(2)    |
| Ni1  | N1   | C1B  | C2B  | 31.5(19)  |
| Ni1  | N2   | C2   | C1   | -30(2)    |
| Ni1  | N2   | C2B  | C1B  | 46.6(19)  |
| N1   | C1   | C2   | N2   | 50(3)     |
| N1   | C1B  | C2B  | N2   | -52(2)    |
| B1   | O1   | B2   | O3   | -45.4(5)  |
| B1   | O1   | B2   | O4   | -163.9(4) |
| B1   | O1   | B2   | O9   | 75.4(5)   |
| B1   | O1   | B3   | O5   | 162.2(4)  |
| B1   | O1   | B3   | O6   | 44.3(5)   |
| B1   | O1   | B3   | O10  | -77.8(5)  |
| B1   | O2   | B4   | O3   | 3.1(6)    |
| B1   | O2   | B4   | O11  | -178.1(4) |
| B1   | O7   | B6   | O6   | 3.9(8)    |
| B1   | O7   | B6   | O13  | -174.3(5) |
| B2   | O1   | B1   | O2   | 46.2(5)   |
| B2   | O1   | B1   | O7   | 164.4(4)  |
| B2   | O1   | B1   | O8   | -74.4(5)  |
| B2   | O1   | B3   | O5   | -38.2(5)  |
| B2   | O1   | B3   | O6   | -156.2(4) |
| B2   | O1   | B3   | O10  | 81.8(5)   |
| B2   | O3   | B4   | O2   | -2.4(6)   |
| B2   | O3   | B4   | O11  | 178.8(4)  |
| B2   | O4   | B5   | O5   | -2.9(8)   |
| B2   | O4   | B5   | O12  | 176.8(5)  |
| B3   | O1   | B1   | O2   | -153.7(4) |
| B3   | O1   | B1   | O7   | -35.6(5)  |
| B3   | O1   | B1   | O8   | 85.6(4)   |
| B3   | O1   | B2   | O3   | 154.7(4)  |
| B3   | O1   | B2   | O4   | 36.3(6)   |
| B3   | O1   | B2   | O9   | -84.4(5)  |
| B3   | O5   | B5   | O4   | 0.0(8)    |
| B3   | O5   | B5   | O12  | -179.7(5) |
| B3   | O6   | B6   | O7   | 7.1(8)    |
| B3   | O6   | B6   | O13  | -174.7(5) |
| B4   | O2   | B1   | O1   | -24.1(6)  |
| B4   | O2   | B1   | O7   | -143.7(4) |
| B4   | O2   | B1   | O8   | 94.3(5)   |
| B4   | O3   | B2   | O1   | 22.5(6)   |
| B4   | O3   | B2   | O4   | 141.9(4)  |
| B4   | O3   | B2   | O9   | -94.7(5)  |
| B5   | O4   | B2   | O1   | -14.7(6)  |
| B5   | O4   | B2   | O3   | -133.2(4) |
| B5   | O4   | B2   | O9   | 102.9(5)  |
| B5   | O5   | B3   | O1   | 19.3(6)   |
| B5   | O5   | B3   | O6   | 136.7(5)  |
| B5   | O5   | B3   | O10  | -100.6(5) |
| B6   | O6   | B3   | O1   | -29.0(6)  |
| B6   | O6   | B3   | O5   | -146.6(5) |
| B6   | O6   | B3   | O10  | 91.7(6)   |
| B6   | O7   | B1   | O1   | 10.4(6)   |

| Atom | Atom | Atom | Atom | Angle/°   |
|------|------|------|------|-----------|
| B6   | O7   | B1   | O2   | 129.2(5)  |
| B6   | O7   | B1   | O8   | -108.7(5) |



**Table S6:** Hydrogen Fractional Atomic Coordinates ( $\times 10^4$ ) and Equivalent Isotropic Displacement Parameters ( $\text{\AA}^2 \times 10^3$ ) for **MAB7**.  $U_{eq}$  is defined as 1/3 of the trace of the orthogonalised  $U_{ij}$ .

| Atom | x        | y         | z        | $U_{eq}$ |
|------|----------|-----------|----------|----------|
| H8   | 3450(60) | 5520(15)  | 4760(30) | 20       |
| H9   | 3430(60) | 10220(30) | 4820(30) | 20       |
| H10  | 500.99   | 8235.68   | 5830.87  | 23       |
| H11  | 8212.17  | 7547.03   | 6563.35  | 32       |
| H12  | 627.41   | 11825.27  | 9712.59  | 35       |
| H13A | 2048.19  | 4051.2    | 8863.3   | 46       |
| H13  | 988.5    | 5176.86   | 9912.49  | 46       |
| H21A | 458.36   | 8106.87   | 3147.18  | 23       |
| H21B | 442.36   | 9392.88   | 3850.46  | 23       |
| H22A | 6367.33  | 7994.79   | 3202.79  | 23       |
| H22B | 6410.15  | 6528.1    | 3042.57  | 23       |
| H1AA | 4281.52  | 5593.38   | 2082.44  | 18       |
| H1AB | 2618.27  | 6358.03   | 1783.81  | 18       |
| H1BC | 4592.52  | 5768.91   | 1870.49  | 18       |
| H1BD | 2788.07  | 6037.86   | 2029.63  | 18       |
| H2AA | 2624.77  | 10071.03  | 2087.7   | 19       |
| H2AB | 4436.34  | 9598.26   | 1929.12  | 19       |
| H2BC | 2476.75  | 9807.81   | 1819.31  | 19       |
| H2BD | 4084.52  | 9913.97   | 2154.09  | 19       |
| H1A  | 4187.9   | 6516.05   | -159.32  | 23       |
| H1B  | 5540.91  | 6859.68   | 686.72   | 23       |
| H2A  | 4123.18  | 9010.91   | -134.67  | 18       |
| H2B  | 2378.18  | 8739      | 401.92   | 18       |
| H1BA | 2413.39  | 7603.57   | 379.93   | 21       |
| H1BB | 4189.85  | 6592.28   | -203.6   | 21       |
| H2BA | 5516.69  | 8114.18   | 740.11   | 18       |
| H2BB | 4161.06  | 9079.94   | -116.47  | 18       |
| H31A | 607.81   | 5007.07   | 3915.31  | 32       |
| H31B | -292.5   | 6391.42   | 4417.51  | 32       |
| H31C | 952.75   | 5004.4    | 2879.84  | 40       |
| H31D | -105.31  | 6197.24   | 3652.65  | 40       |

**Table S7:** Hydrogen Bond information for **MAB7**.

| <b>D</b> | <b>H</b> | <b>A</b>         | <b>d(D-H)/Å</b> | <b>d(H-A)/Å</b> | <b>d(D-A)/Å</b> | <b>D-H-A/deg</b> |
|----------|----------|------------------|-----------------|-----------------|-----------------|------------------|
| O8       | H8       | O2 <sup>1</sup>  | 0.879(12)       | 1.97(2)         | 2.786(5)        | 154(4)           |
| O9       | H9       | O3 <sup>2</sup>  | 0.881(12)       | 2.02(2)         | 2.831(5)        | 152(4)           |
| O10      | H10      | O8               | 0.84            | 2.55            | 3.227(5)        | 137.9            |
| O10      | H10      | O21              | 0.84            | 1.97            | 2.704(5)        | 144.9            |
| O11      | H11      | O10 <sup>3</sup> | 0.84            | 2.04            | 2.805(5)        | 151.7            |
| O12      | H12      | O6 <sup>4</sup>  | 0.84            | 2.04            | 2.798(6)        | 150.3            |
| O13      | H13A     | O12 <sup>5</sup> | 0.84            | 2.41            | 2.960(5)        | 123.9            |
| O13      | H13      | O13 <sup>6</sup> | 0.84            | 2.12            | 2.684(9)        | 123.9            |
| O21      | H21A     | O31              | 0.88            | 2.43            | 2.872(9)        | 111.7            |
| O21      | H21A     | O31B             | 0.88            | 2.22            | 2.841(8)        | 127.5            |
| O21      | H21B     | O5 <sup>7</sup>  | 0.88            | 2.65            | 3.087(5)        | 111.8            |
| O21      | H21B     | O10 <sup>7</sup> | 0.88            | 1.95            | 2.807(5)        | 163.3            |
| O22      | H22A     | O4 <sup>2</sup>  | 0.88            | 1.85            | 2.724(5)        | 170.0            |
| O22      | H22B     | O7 <sup>1</sup>  | 0.88            | 1.93            | 2.744(5)        | 153.4            |
| N1       | H1AA     | O2 <sup>1</sup>  | 0.91            | 2.23            | 3.017(5)        | 143.8            |
| N1       | H1BC     | O7 <sup>1</sup>  | 0.91            | 2.32            | 3.171(5)        | 154.7            |
| N1       | H1BD     | O31B             | 0.91            | 2.14            | 2.993(12)       | 155.2            |
| N2       | H2AA     | O10 <sup>7</sup> | 0.91            | 2.45            | 3.281(6)        | 151.4            |
| N2       | H2AB     | O4 <sup>2</sup>  | 0.91            | 2.34            | 3.188(6)        | 154.1            |
| N2       | H2BD     | O3 <sup>2</sup>  | 0.91            | 2.17            | 2.997(5)        | 150.9            |
| O31      | H31A     | O11 <sup>1</sup> | 0.87            | 1.89            | 2.715(10)       | 157.1            |
| O31      | H31A     | O31 <sup>8</sup> | 0.87            | 2.51            | 3.01(3)         | 117.4            |
| O31      | H31B     | O11 <sup>9</sup> | 0.87            | 2.27            | 2.993(13)       | 140.4            |
| O31B     | H31C     | O11 <sup>1</sup> | 0.87            | 1.97            | 2.812(9)        | 161.4            |

-----  
<sup>1</sup>1-x,1-y,1-z; <sup>2</sup>1-x,2-y,1-z; <sup>3</sup>1+x,y,+z; <sup>4</sup>-x,2-y,2-z; <sup>5</sup>+x,-1+y,+z; <sup>6</sup>-x,1-y,2-z; <sup>7</sup>-x,2-y,1-z; <sup>8</sup>-x,1-y,1-z; <sup>9</sup>-1+x,y,+z

**Table S8:** Atomic Occupancies for all atoms that are not fully occupied in **MAB7**.

| Atom | Occupancy | Atom | Occupancy | Atom | Occupancy | Atom | Occupancy |
|------|-----------|------|-----------|------|-----------|------|-----------|
| H13A | 0.5       | H2AB | 0.48(3)   | H2A  | 0.48(3)   | H2BB | 0.52(3)   |
| H13  | 0.5       | H2BC | 0.52(3)   | H2B  | 0.48(3)   | O31  | 0.47(2)   |
| H1AA | 0.48(3)   | H2BD | 0.52(3)   | C1B  | 0.52(3)   | H31A | 0.47(2)   |
| H1AB | 0.48(3)   | C1   | 0.48(3)   | H1BA | 0.52(3)   | H31B | 0.47(2)   |
| H1BC | 0.52(3)   | H1A  | 0.48(3)   | H1BB | 0.52(3)   | O31B | 0.53(2)   |
| H1BD | 0.52(3)   | H1B  | 0.48(3)   | C2B  | 0.52(3)   | H31C | 0.53(2)   |
| H2AA | 0.48(3)   | C2   | 0.48(3)   | H2BA | 0.52(3)   | H31D | 0.53(2)   |

## Compound 8

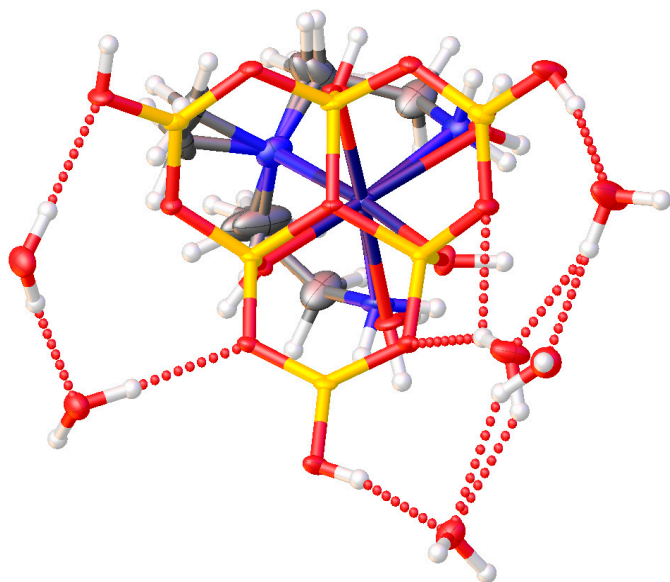

**Crystal Data.**  $\text{C}_4\text{H}_{30}\text{B}_6\text{N}_2\text{NiO}_{19}$ ,  $M_r = 533.87$ , triclinic,  $P-1$  (No. 2),  $a = 9.1508(4)$  Å,  $b = 9.8599(4)$  Å,  $c = 13.5971(4)$  Å,  $\alpha = 88.525(3)^\circ$ ,  $\beta = 70.627(3)^\circ$ ,  $\gamma = 65.245(4)^\circ$ ,  $V = 1041.79(8)$  Å<sup>3</sup>,  $T = 100(2)$  K,  $Z = 2$ ,  $Z' = 1$ ,  $\mu(\text{Mo K}\alpha) = 1.023$ , 15537 reflections measured, 4713 unique ( $R_{\text{int}} = 0.0461$ ) which were used in all calculations. The final  $wR_2$  was 0.1048 (all data) and  $R_1$  was 0.0403 ( $I \geq 2 \sigma(I)$ ).

| Compound                            | MAB8                                                         |
|-------------------------------------|--------------------------------------------------------------|
| Formula                             | $\text{C}_4\text{H}_{30}\text{B}_6\text{N}_2\text{NiO}_{19}$ |
| $D_{\text{calc.}}/\text{g cm}^{-3}$ | 1.702                                                        |
| $\mu/\text{mm}^{-1}$                | 1.023                                                        |
| Formula Weight                      | 533.87                                                       |
| Colour                              | bluish green                                                 |
| Shape                               | plate-shaped                                                 |
| Size/mm <sup>3</sup>                | 0.12×0.04×0.01                                               |
| $T/\text{K}$                        | 100(2)                                                       |
| Crystal System                      | triclinic                                                    |
| Space Group                         | $P-1$                                                        |
| $a/\text{\AA}$                      | 9.1508(4)                                                    |
| $b/\text{\AA}$                      | 9.8599(4)                                                    |
| $c/\text{\AA}$                      | 13.5971(4)                                                   |
| $\alpha/^\circ$                     | 88.525(3)                                                    |
| $\beta/^\circ$                      | 70.627(3)                                                    |
| $\gamma/^\circ$                     | 65.245(4)                                                    |
| $V/\text{\AA}^3$                    | 1041.79(8)                                                   |
| $Z$                                 | 2                                                            |
| $Z'$                                | 1                                                            |
| Wavelength/Å                        | 0.71075                                                      |
| Radiation type                      | Mo $\text{K}\alpha$                                          |
| $\theta_{\text{min}}/^\circ$        | 2.620                                                        |
| $\theta_{\text{max}}/^\circ$        | 27.483                                                       |
| Measured Refl's.                    | 15537                                                        |
| Indep't Refl's                      | 4713                                                         |
| Refl's $I \geq 2 \sigma(I)$         | 3882                                                         |
| $R_{\text{int}}$                    | 0.0461                                                       |
| Parameters                          | 376                                                          |
| Restraints                          | 375                                                          |
| Largest Peak                        | 1.334                                                        |
| Deepest Hole                        | -0.806                                                       |
| GooF                                | 1.064                                                        |
| $wR_2$ (all data)                   | 0.1048                                                       |
| $wR_2$                              | 0.1005                                                       |
| $R_1$ (all data)                    | 0.0535                                                       |
| $R_1$                               | 0.0403                                                       |

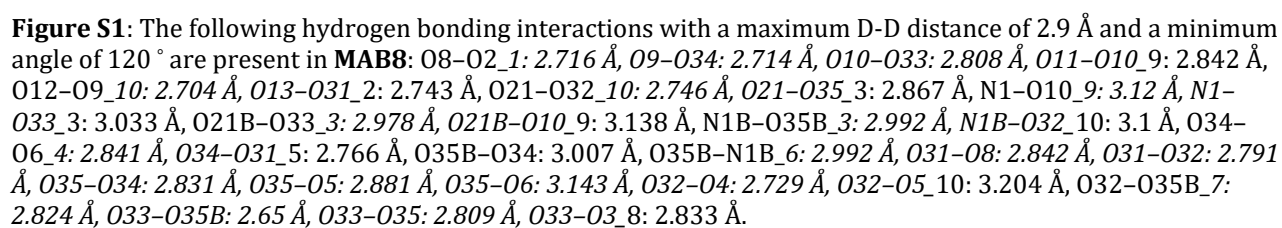

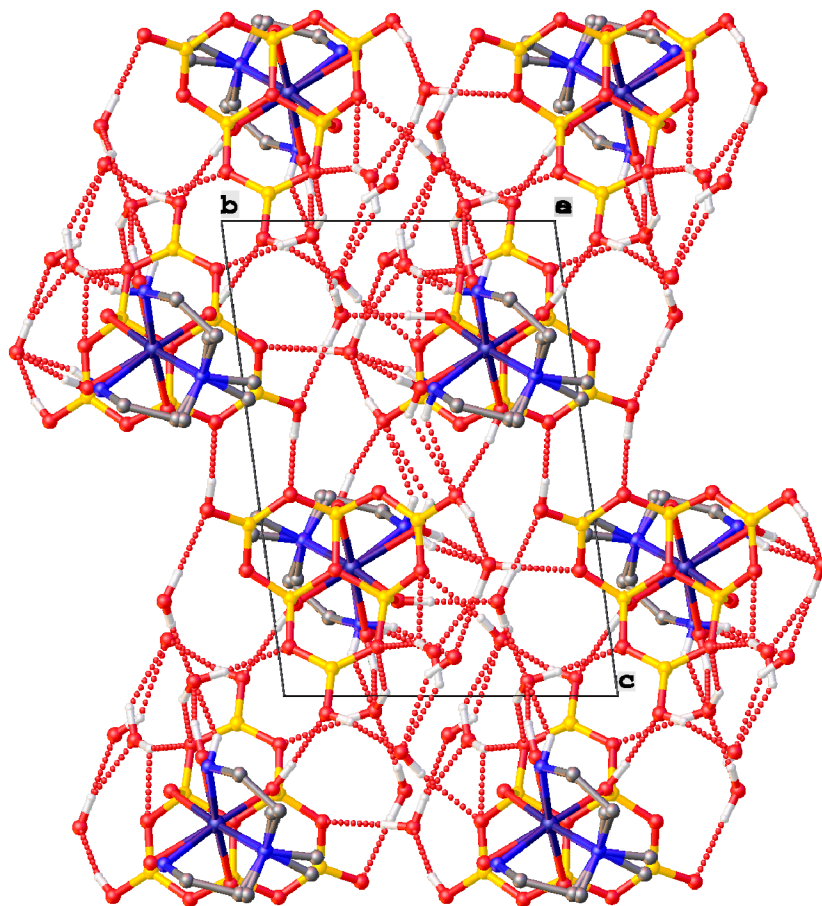

**Figure S2:** Packing diagram of MAB8.

**Table S1:** Fractional Atomic Coordinates ( $\times 10^4$ ) and Equivalent Isotropic Displacement Parameters ( $\text{\AA}^2 \times 10^3$ ) for **MAB8**.  $U_{eq}$  is defined as 1/3 of the trace of the orthogonalised  $U_{ij}$ .

| Atom | x          | y           | z           | $U_{eq}$  |
|------|------------|-------------|-------------|-----------|
| Ni1  | 233.5(3)   | 7452.8(3)   | 7301.7(2)   | 10.54(10) |
| O1   | 3182.4(19) | 7965.7(18)  | 7354.1(11)  | 9.0(3)    |
| O2   | 3923(2)    | 9019.0(19)  | 5768.0(11)  | 11.5(3)   |
| O3   | 1850(2)    | 10637.4(18) | 7355.6(12)  | 11.4(3)   |
| O4   | 1794.3(19) | 9655.6(19)  | 8971.7(11)  | 11.5(3)   |
| O5   | 3387(2)    | 7018.3(19)  | 8969.5(12)  | 14.0(3)   |
| O6   | 5114(2)    | 5401.8(19)  | 7367.9(12)  | 13.8(3)   |
| O7   | 5206(2)    | 6355.6(19)  | 5718.6(11)  | 12.0(3)   |
| O8   | 3452(2)    | 11569.8(19) | 6090.7(12)  | 14.2(3)   |
| O9   | 2708(2)    | 8810(2)     | 10374.7(13) | 14.8(4)   |
| O10  | 7407(2)    | 4063(2)     | 5788.1(14)  | 22.7(4)   |
| O11  | 2166(2)    | 7639(2)     | 6025.8(12)  | 12.5(3)   |
| O12  | 128.7(19)  | 9282.1(19)  | 8044.6(12)  | 12.1(3)   |
| O13  | 2040(2)    | 6216.6(19)  | 7994.7(13)  | 15.1(3)   |
| B1   | 3645(3)    | 7717(3)     | 6169.0(19)  | 11.4(5)   |
| B2   | 1689(3)    | 9428(3)     | 7946.2(18)  | 9.9(5)    |
| B3   | 3438(3)    | 6602(3)     | 7933.8(19)  | 9.7(5)    |
| B4   | 3090(3)    | 10374(3)    | 6386.9(19)  | 11.3(5)   |
| B5   | 2645(3)    | 8471(3)     | 9420.0(19)  | 11.0(5)   |
| B6   | 5870(3)    | 5295(3)     | 6300(2)     | 13.2(5)   |
| O21  | -1578(14)  | 7300(15)    | 8714(7)     | 17.0(17)  |
| N1   | 340(10)    | 5727(10)    | 6453(9)     | 18.5(17)  |
| N2   | -1750(50)  | 8830(40)    | 6740(40)    | 20.7(9)   |

| Atom | x         | y         | z           | $U_{eq}$ |
|------|-----------|-----------|-------------|----------|
| C1   | -1180(7)  | 6334(8)   | 6114(5)     | 35.8(11) |
| C2   | -1560(50) | 7860(30)  | 5830(20)    | 35.8(17) |
| C3   | -3340(30) | 9170(30)  | 7540(20)    | 52(2)    |
| C4   | -1480(20) | 10097(15) | 6251(10)    | 42(3)    |
| O21B | 868(9)    | 5325(8)   | 6481(6)     | 15.4(13) |
| N1B  | -1758(18) | 7430(20)  | 8501(9)     | 17(2)    |
| N2B  | -1760(50) | 8790(40)  | 6720(50)    | 20.7(9)  |
| C1B  | -3383(7)  | 8338(8)   | 8346(5)     | 35.8(11) |
| C2B  | -3550(40) | 9370(30)  | 7580(20)    | 52(2)    |
| C3B  | -1660(50) | 8080(30)  | 5810(20)    | 35.8(17) |
| C4B  | -1860(20) | 10323(15) | 6600(9)     | 31(3)    |
| O34  | 4905(2)   | 6723(2)   | 11182.4(14) | 21.2(4)  |
| O35B | 7594(13)  | 4761(10)  | 9182(5)     | 23(2)    |
| O31  | 2708(2)   | 13234(2)  | 8010.3(14)  | 20.6(4)  |
| O35  | 6763(4)   | 5335(4)   | 9072(2)     | 24.0(10) |
| O32  | 387(2)    | 12648(2)  | 9687.4(14)  | 19.8(4)  |
| O33  | 9123(3)   | 3338(3)   | 7235.0(15)  | 34.8(5)  |

**Table S2:** Anisotropic Displacement Parameters ( $\times 10^4$ ) for **MAB8**. The anisotropic displacement factor exponent takes the form:  $-2\pi^2[h^2a^{*2} \times U_{11} + \dots + 2hka^* \times b^* \times U_{12}]$

| Atom | $U_{11}$ | $U_{22}$  | $U_{33}$ | $U_{23}$ | $U_{13}$  | $U_{12}$  |
|------|----------|-----------|----------|----------|-----------|-----------|
| Ni1  | 9.90(16) | 14.51(18) | 9.00(16) | 1.96(11) | -3.11(12) | -7.14(12) |
| O1   | 9.7(7)   | 12.0(8)   | 4.5(7)   | 0.8(6)   | -1.1(6)   | -5.2(6)   |
| O2   | 12.4(7)  | 15.1(9)   | 6.5(7)   | 2.0(6)   | -1.0(6)   | -7.4(7)   |
| O3   | 12.4(7)  | 11.5(8)   | 8.4(7)   | 1.3(6)   | -1.0(6)   | -5.4(7)   |
| O4   | 10.9(7)  | 13.0(8)   | 6.7(7)   | -1.0(6)  | -1.2(6)   | -3.1(7)   |
| O5   | 20.9(8)  | 14.1(9)   | 7.3(7)   | 1.6(6)   | -5.6(7)   | -7.5(7)   |
| O6   | 11.2(7)  | 14.9(9)   | 8.3(7)   | 1.1(6)   | -1.0(6)   | -1.3(7)   |
| O7   | 12.1(8)  | 13.7(9)   | 7.0(7)   | -0.1(6)  | -0.5(6)   | -4.8(7)   |
| O8   | 15.6(8)  | 16.5(9)   | 8.2(7)   | 0.8(6)   | 1.1(7)    | -9.1(7)   |
| O9   | 13.9(8)  | 16.0(9)   | 9.2(8)   | -1.0(7)  | -4.6(7)   | -0.9(7)   |
| O10  | 14.9(9)  | 28.4(11)  | 10.3(8)  | -3.7(8)  | -4.6(7)   | 4.3(8)    |
| O11  | 11.9(8)  | 20.2(9)   | 5.4(7)   | -1.2(6)  | -0.2(6)   | -9.0(7)   |
| O12  | 7.6(7)   | 12.8(8)   | 11.7(8)  | -2.2(6)  | 0.4(6)    | -3.4(7)   |
| O13  | 14.2(8)  | 13.0(9)   | 21.9(9)  | 6.4(7)   | -8.1(7)   | -8.2(7)   |
| B1   | 11.4(11) | 17.8(14)  | 5.7(11)  | 2.9(10)  | -1.7(9)   | -8.1(10)  |
| B2   | 9.2(11)  | 12.7(13)  | 6.0(10)  | 0.4(9)   | -0.5(9)   | -4.6(10)  |
| B3   | 8.8(11)  | 11.2(13)  | 7.6(11)  | 1.5(9)   | -2.0(9)   | -3.6(10)  |
| B4   | 9.8(11)  | 17.0(13)  | 8.0(11)  | 2.6(10)  | -3.7(9)   | -6.1(10)  |
| B5   | 9.3(11)  | 14.9(13)  | 6.3(11)  | 0.4(9)   | 0.8(9)    | -5.7(10)  |
| B6   | 10.3(11) | 16.9(14)  | 10.7(11) | -1.7(10) | -2.0(10)  | -5.6(10)  |
| O21  | 21(3)    | 23(3)     | 7(3)     | 4(3)     | 0(2)      | -14(3)    |
| N1   | 21(4)    | 22(4)     | 15(3)    | 4(3)     | -4(3)     | -14(3)    |
| N2   | 15.6(10) | 29.4(17)  | 21.2(19) | 7.7(18)  | -10.5(10) | -10.9(12) |
| C1   | 16.3(18) | 45(3)     | 38(2)    | 15(2)    | -2.5(18)  | -11.5(19) |
| C2   | 30(3)    | 30(5)     | 37.8(19) | -11(3)   | -20.4(18) | 3(4)      |
| C3   | 22(5)    | 86(6)     | 26(2)    | 16(3)    | -8(3)     | -4(5)     |
| C4   | 48(8)    | 39(7)     | 62(9)    | 35(6)    | -38(7)    | -26(7)    |
| O21B | 22(4)    | 15(3)     | 9(2)     | -3(2)    | -1(3)     | -11(3)    |
| N1B  | 21(3)    | 28(5)     | 8(4)     | 1(3)     | -4(3)     | -15(3)    |
| N2B  | 15.6(10) | 29.4(17)  | 21.2(19) | 7.7(18)  | -10.5(10) | -10.9(12) |
| C1B  | 16.3(18) | 45(3)     | 38(2)    | 15(2)    | -2.5(18)  | -11.5(19) |
| C2B  | 22(5)    | 86(6)     | 26(2)    | 16(3)    | -8(3)     | -4(5)     |
| C3B  | 30(3)    | 30(5)     | 37.8(19) | -11(3)   | -20.4(18) | 3(4)      |
| C4B  | 40(7)    | 17(3)     | 36(6)    | -7(4)    | -30(5)    | 2(4)      |
| O34  | 22.1(9)  | 22.1(10)  | 22.5(9)  | 8.0(8)   | -10.1(8)  | -11.0(8)  |
| O31  | 22.3(9)  | 17.2(10)  | 23.1(9)  | 0.4(8)   | -4.4(8)   | -11.9(8)  |
| O35  | 16.5(18) | 36(2)     | 13.5(13) | -3.8(12) | -4.8(11)  | -5.2(16)  |
| O32  | 24.0(9)  | 15.6(9)   | 18.4(9)  | -0.1(7)  | -5.0(8)   | -9.0(8)   |
| O33  | 28.0(11) | 31.5(12)  | 21.9(10) | -5.9(9)  | -12.4(9)  | 11.4(9)   |

**Table S3:** Bond Lengths in Å for **MAB8**.

| Atom | Atom | Length/Å   |
|------|------|------------|
| Ni1  | O11  | 2.0956(15) |
| Ni1  | O12  | 2.0415(17) |
| Ni1  | O13  | 2.0958(17) |
| Ni1  | O21  | 2.131(11)  |
| Ni1  | N1   | 2.031(11)  |
| Ni1  | N2   | 2.13(2)    |
| Ni1  | O21B | 2.158(8)   |
| Ni1  | N1B  | 2.009(15)  |
| Ni1  | N2B  | 2.14(2)    |
| O1   | B1   | 1.522(3)   |
| O1   | B2   | 1.508(3)   |
| O1   | B3   | 1.513(3)   |
| O2   | B1   | 1.468(3)   |
| O2   | B4   | 1.362(3)   |
| O3   | B2   | 1.452(3)   |
| O3   | B4   | 1.367(3)   |
| O4   | B2   | 1.458(3)   |
| O4   | B5   | 1.363(3)   |
| O5   | B3   | 1.457(3)   |
| O5   | B5   | 1.358(3)   |

| Atom | Atom | Length/Å  |
|------|------|-----------|
| O6   | B3   | 1.445(3)  |
| O6   | B6   | 1.371(3)  |
| O7   | B1   | 1.440(3)  |
| O7   | B6   | 1.353(3)  |
| O8   | B4   | 1.369(3)  |
| O9   | B5   | 1.374(3)  |
| O10  | B6   | 1.379(3)  |
| O11  | B1   | 1.462(3)  |
| O12  | B2   | 1.457(3)  |
| O13  | B3   | 1.458(3)  |
| N1   | C1   | 1.490(9)  |
| N2   | C2   | 1.50(6)   |
| N2   | C3   | 1.40(6)   |
| N2   | C4   | 1.475(14) |
| C1   | C2   | 1.46(2)   |
| N1B  | C1B  | 1.463(12) |
| N2B  | C2B  | 1.54(6)   |
| N2B  | C3B  | 1.39(6)   |
| N2B  | C4B  | 1.488(16) |
| C1B  | C2B  | 1.44(2)   |

**Table S4:** Bond Angles in ° for **MAB8**.

| Atom | Atom | Atom | Angle/°    |
|------|------|------|------------|
| O11  | Ni1  | O13  | 90.66(6)   |
| O11  | Ni1  | O21  | 173.2(3)   |
| O11  | Ni1  | N2   | 93.1(13)   |
| O11  | Ni1  | O21B | 87.9(2)    |
| O11  | Ni1  | N2B  | 93.2(13)   |
| O12  | Ni1  | O11  | 85.85(6)   |
| O12  | Ni1  | O13  | 84.26(7)   |
| O12  | Ni1  | O21  | 89.3(4)    |
| O12  | Ni1  | N2   | 92.2(11)   |
| O12  | Ni1  | O21B | 168.81(18) |
| O12  | Ni1  | N2B  | 93.7(11)   |
| O13  | Ni1  | O21  | 84.0(2)    |
| O13  | Ni1  | N2   | 174.6(17)  |
| O13  | Ni1  | O21B | 86.56(18)  |
| O13  | Ni1  | N2B  | 175.5(16)  |
| O21  | Ni1  | N2   | 91.9(14)   |
| N1   | Ni1  | O11  | 90.7(3)    |
| N1   | Ni1  | O12  | 175.1(3)   |
| N1   | Ni1  | O13  | 99.3(2)    |
| N1   | Ni1  | O21  | 94.4(5)    |
| N1   | Ni1  | N2   | 84.5(12)   |
| N1B  | Ni1  | O11  | 175.3(4)   |
| N1B  | Ni1  | O12  | 92.5(6)    |
| N1B  | Ni1  | O13  | 93.6(3)    |
| N1B  | Ni1  | O21B | 94.5(6)    |
| N1B  | Ni1  | N2B  | 82.5(13)   |
| N2B  | Ni1  | O21B | 95.9(12)   |
| B2   | O1   | B1   | 117.35(17) |
| B2   | O1   | B3   | 116.19(16) |
| B3   | O1   | B1   | 117.62(18) |
| B4   | O2   | B1   | 120.47(17) |
| B4   | O3   | B2   | 122.42(19) |

| Atom | Atom | Atom | Angle/°    |
|------|------|------|------------|
| B5   | O4   | B2   | 121.21(19) |
| B5   | O5   | B3   | 122.74(19) |
| B6   | O6   | B3   | 121.12(19) |
| B6   | O7   | B1   | 123.00(18) |
| B1   | O11  | Ni1  | 120.69(13) |
| B2   | O12  | Ni1  | 121.19(14) |
| B3   | O13  | Ni1  | 120.50(13) |
| O2   | B1   | O1   | 105.86(19) |
| O7   | B1   | O1   | 109.89(18) |
| O7   | B1   | O2   | 109.70(17) |
| O7   | B1   | O11  | 112.5(2)   |
| O11  | B1   | O1   | 105.27(16) |
| O11  | B1   | O2   | 113.32(19) |
| O3   | B2   | O1   | 108.00(16) |
| O3   | B2   | O4   | 109.17(19) |
| O3   | B2   | O12  | 112.73(19) |
| O4   | B2   | O1   | 108.41(18) |
| O12  | B2   | O1   | 106.72(18) |
| O12  | B2   | O4   | 111.65(17) |
| O5   | B3   | O1   | 107.70(19) |
| O5   | B3   | O13  | 112.22(17) |
| O6   | B3   | O1   | 108.90(17) |
| O6   | B3   | O5   | 108.77(18) |
| O6   | B3   | O13  | 112.7(2)   |
| O13  | B3   | O1   | 106.36(17) |
| O2   | B4   | O3   | 122.6(2)   |
| O2   | B4   | O8   | 122.4(2)   |
| O3   | B4   | O8   | 115.0(2)   |
| O4   | B5   | O9   | 116.6(2)   |
| O5   | B5   | O4   | 122.8(2)   |
| O5   | B5   | O9   | 120.5(2)   |
| O6   | B6   | O10  | 118.7(2)   |



| Atom | Atom | Atom | Angle/°   | Atom | Atom | Atom | Angle/°   |
|------|------|------|-----------|------|------|------|-----------|
| O7   | B6   | O6   | 123.4(2)  | C1   | C2   | N2   | 108.2(18) |
| O7   | B6   | O10  | 117.9(2)  | C1B  | N1B  | Ni1  | 110.7(7)  |
| C1   | N1   | Ni1  | 107.6(5)  | C2B  | N2B  | Ni1  | 112(3)    |
| C2   | N2   | Ni1  | 105(2)    | C3B  | N2B  | Ni1  | 113(3)    |
| C3   | N2   | Ni1  | 108(2)    | C3B  | N2B  | C2B  | 113.1(16) |
| C3   | N2   | C2   | 109.1(15) | C3B  | N2B  | C4B  | 113(3)    |
| C3   | N2   | C4   | 118(3)    | C4B  | N2B  | Ni1  | 111.3(14) |
| C4   | N2   | Ni1  | 112.9(14) | C4B  | N2B  | C2B  | 93(3)     |
| C4   | N2   | C2   | 103(3)    | C2B  | C1B  | N1B  | 123.5(13) |
| C2   | C1   | N1   | 111.7(16) | C1B  | C2B  | N2B  | 105.7(16) |

**Table S5:** Torsion Angles in ° for **MAB8**.

| Atom | Atom | Atom | Atom | Angle/°     |
|------|------|------|------|-------------|
| Ni1  | O11  | B1   | O1   | -11.5(2)    |
| Ni1  | O11  | B1   | O2   | -126.76(16) |
| Ni1  | O11  | B1   | O7   | 108.10(17)  |
| Ni1  | O12  | B2   | O1   | -6.7(2)     |
| Ni1  | O12  | B2   | O3   | 111.70(18)  |
| Ni1  | O12  | B2   | O4   | -124.99(16) |
| Ni1  | O13  | B3   | O1   | 1.8(2)      |
| Ni1  | O13  | B3   | O5   | 119.33(17)  |
| Ni1  | O13  | B3   | O6   | -117.45(17) |
| Ni1  | N1   | C1   | C2   | 38.2(14)    |
| Ni1  | N2   | C2   | C1   | 41(3)       |
| Ni1  | N1B  | C1B  | C2B  | -14(2)      |
| Ni1  | N2B  | C2B  | C1B  | -24(3)      |
| B1   | O1   | B2   | O3   | -44.2(2)    |
| B1   | O1   | B2   | O4   | -162.38(16) |
| B1   | O1   | B2   | O12  | 77.2(2)     |
| B1   | O1   | B3   | O5   | 164.34(16)  |
| B1   | O1   | B3   | O6   | 46.5(2)     |
| B1   | O1   | B3   | O13  | -75.2(2)    |
| B1   | O2   | B4   | O3   | -6.5(3)     |
| B1   | O2   | B4   | O8   | 172.5(2)    |
| B1   | O7   | B6   | O6   | 0.9(3)      |
| B1   | O7   | B6   | O10  | -177.6(2)   |
| B2   | O1   | B1   | O2   | 55.1(2)     |
| B2   | O1   | B1   | O7   | 173.48(17)  |
| B2   | O1   | B1   | O11  | -65.2(2)    |
| B2   | O1   | B3   | O5   | -49.0(2)    |
| B2   | O1   | B3   | O6   | -166.83(17) |
| B2   | O1   | B3   | O13  | 71.5(2)     |
| B2   | O3   | B4   | O2   | 20.0(3)     |
| B2   | O3   | B4   | O8   | -159.1(2)   |
| B2   | O4   | B5   | O5   | -2.5(3)     |
| B2   | O4   | B5   | O9   | 178.31(18)  |
| B3   | O1   | B1   | O2   | -158.67(17) |
| B3   | O1   | B1   | O7   | -40.3(2)    |
| B3   | O1   | B1   | O11  | 81.1(2)     |
| B3   | O1   | B2   | O3   | 169.06(17)  |
| B3   | O1   | B2   | O4   | 50.9(2)     |
| B3   | O1   | B2   | O12  | -69.5(2)    |
| B3   | O5   | B5   | O4   | 4.2(3)      |
| B3   | O5   | B5   | O9   | -176.58(19) |
| B3   | O6   | B6   | O7   | 6.5(3)      |
| B3   | O6   | B6   | O10  | -174.9(2)   |
| B4   | O2   | B1   | O1   | -28.3(3)    |
| B4   | O2   | B1   | O7   | -146.8(2)   |
| B4   | O2   | B1   | O11  | 86.6(2)     |
| B4   | O3   | B2   | O1   | 5.6(3)      |

| Atom | Atom | Atom | Atom | Angle/°     |
|------|------|------|------|-------------|
| B4   | O3   | B2   | O4   | 123.3(2)    |
| B4   | O3   | B2   | O12  | -112.1(2)   |
| B5   | O4   | B2   | O1   | -23.9(2)    |
| B5   | O4   | B2   | O3   | -141.34(19) |
| B5   | O4   | B2   | O12  | 93.4(2)     |
| B5   | O5   | B3   | O1   | 20.7(3)     |
| B5   | O5   | B3   | O6   | 138.6(2)    |
| B5   | O5   | B3   | O13  | -96.0(2)    |
| B6   | O6   | B3   | O1   | -28.8(3)    |
| B6   | O6   | B3   | O5   | -145.9(2)   |
| B6   | O6   | B3   | O13  | 89.0(2)     |
| B6   | O7   | B1   | O1   | 15.6(3)     |
| B6   | O7   | B1   | O2   | 131.6(2)    |
| B6   | O7   | B1   | O11  | -101.3(2)   |
| N1   | C1   | C2   | N2   | -54(3)      |
| C3   | N2   | C2   | C1   | -75(2)      |
| C4   | N2   | C2   | C1   | 160(2)      |
| N1B  | C1B  | C2B  | N2B  | 26(3)       |
| C3B  | N2B  | C2B  | C1B  | 105(2)      |
| C4B  | N2B  | C2B  | C1B  | -139(2)     |

**Table S6:** Hydrogen Fractional Atomic Coordinates ( $\times 10^4$ ) and Equivalent Isotropic Displacement Parameters ( $\text{\AA}^2 \times 10^3$ ) for **MAB8**.  $U_{eq}$  is defined as 1/3 of the trace of the orthogonalised  $U_{ij}$ .

| Atom | x        | y        | z         | $U_{eq}$ |
|------|----------|----------|-----------|----------|
| H8   | 4212.07  | 11327.16 | 5487.84   | 21       |
| H9   | 3310(40) | 8120(40) | 10540(20) | 21(8)    |
| H10  | 7830(40) | 3710(40) | 6190(30)  | 27(9)    |
| H11  | 2500(30) | 7170(30) | 5394(9)   | 19       |
| H12  | -726(18) | 9940(20) | 8553(16)  | 18       |
| H13  | 2420(30) | 5243(12) | 8010(20)  | 23       |
| H21A | -1593.01 | 7197.5   | 9402.43   | 25       |
| H21B | -2152.71 | 6758.6   | 8620.13   | 25       |
| H1A  | 1329.93  | 5345.82  | 5881.36   | 22       |
| H1B  | 316.94   | 4976.92  | 6852.71   | 22       |
| H1C  | -956.29  | 5657.71  | 5501.87   | 43       |
| H1D  | -2193.99 | 6355     | 6692.21   | 43       |
| H2A  | -2635.25 | 8267.8   | 5670.27   | 43       |
| H2B  | -613.41  | 7829.38  | 5195.07   | 43       |
| H3A  | -3534.13 | 8258.59  | 7617.45   | 78       |
| H3B  | -4263    | 9951.57  | 7349.81   | 78       |
| H3C  | -3332.82 | 9526.14  | 8198.82   | 78       |
| H4A  | -1527.26 | 10781.12 | 6784.12   | 63       |
| H4B  | -2375.57 | 10643.22 | 5957.08   | 63       |
| H4C  | -347.77  | 9709.37  | 5688.17   | 63       |
| H21C | 364.69   | 4708.83  | 6655.3    | 23       |
| H21D | 1839.39  | 4870.63  | 5936.6    | 23       |
| H1BA | -1620.68 | 6467.79  | 8549.35   | 21       |
| H1BB | -1782.1  | 7807.52  | 9114.07   | 21       |
| H1BC | -3800.5  | 7619.65  | 8190.02   | 43       |
| H1BD | -4209.3  | 8929.62  | 9035.57   | 43       |
| H2BA | -3911.55 | 10402.09 | 7902.13   | 63       |
| H2BB | -4414.9  | 9390.63  | 7286.88   | 63       |
| H3BA | -633.52  | 7995.54  | 5225.35   | 54       |
| H3BB | -2687.06 | 8672.95  | 5635.9    | 54       |
| H3BC | -1584.34 | 7070.24  | 5922.51   | 54       |
| H4BA | -2308.75 | 10892.64 | 7298.35   | 47       |
| H4BB | -2630.68 | 10842.36 | 6215.45   | 47       |
| H4BC | -711.2   | 10248.27 | 6211.8    | 47       |
| H34A | 4497.33  | 6212.31  | 11631.37  | 32       |
| H34B | 5562.64  | 6977.09  | 11397.44  | 32       |

| Atom | x       | y        | z        | $U_{eq}$ |
|------|---------|----------|----------|----------|
| H35A | 6703.32 | 5580.01  | 9535.55  | 35       |
| H35B | 8526.61 | 4800.69  | 9179.94  | 35       |
| H31A | 2990.77 | 12704.57 | 7418.77  | 31       |
| H31B | 1883.2  | 13109.15 | 8488.87  | 31       |
| H35C | 6440.41 | 5308.2   | 9747.96  | 36       |
| H35D | 5859.74 | 5754.81  | 8892.39  | 36       |
| H32A | 738.81  | 11699.36 | 9487.11  | 30       |
| H32B | -702.11 | 13041.47 | 10069.67 | 30       |
| H33A | 8404.09 | 3797.38  | 7858.29  | 52       |
| H33B | 9918.02 | 2492.57  | 7293.24  | 52       |

**Table S7:** Hydrogen Bond information for **MAB8**.

| D    | H    | A                 | d(D-H)/Å | d(H-A)/Å  | d(D-A)/Å  | D-H-A/deg |
|------|------|-------------------|----------|-----------|-----------|-----------|
| O8   | H8   | O2 <sup>1</sup>   | 0.84     | 1.89      | 2.716(2)  | 169.7     |
| O9   | H9   | O34               | 0.76(3)  | 1.97(3)   | 2.714(3)  | 165(3)    |
| O10  | H10  | O33               | 0.76(3)  | 2.07(4)   | 2.808(3)  | 163(3)    |
| O11  | H11  | O10 <sup>2</sup>  | 0.878(9) | 2.001(11) | 2.842(2)  | 160.1(17) |
| O12  | H12  | O9 <sup>3</sup>   | 0.864(9) | 1.845(9)  | 2.704(2)  | 172.5(18) |
| O13  | H13  | O31 <sup>4</sup>  | 0.876(9) | 1.885(10) | 2.743(2)  | 165.8(17) |
| O21  | H21A | O32 <sup>3</sup>  | 0.94     | 1.96      | 2.746(10) | 140.8     |
| O21  | H21B | O35 <sup>5</sup>  | 0.93     | 2.01      | 2.867(15) | 152.4     |
| N1   | H1A  | O10 <sup>2</sup>  | 0.91     | 2.36      | 3.120(11) | 140.6     |
| N1   | H1B  | O33 <sup>5</sup>  | 0.91     | 2.27      | 3.033(11) | 141.8     |
| O21B | H21C | O33 <sup>5</sup>  | 0.89     | 2.09      | 2.978(9)  | 173.8     |
| O21B | H21D | O10 <sup>2</sup>  | 0.89     | 2.55      | 3.138(9)  | 124.7     |
| N1B  | H1BA | O35B <sup>5</sup> | 0.91     | 2.15      | 3.00(2)   | 154.3     |
| N1B  | H1BB | O32 <sup>3</sup>  | 0.91     | 2.31      | 3.099(11) | 144.4     |
| O34  | H34A | O6 <sup>6</sup>   | 0.87     | 2.06      | 2.841(2)  | 148.9     |
| O34  | H34B | O31 <sup>7</sup>  | 0.87     | 1.94      | 2.766(3)  | 158.3     |
| O35B | H35A | O34               | 0.87     | 2.26      | 3.007(8)  | 143.3     |
| O35B | H35B | N1B <sup>8</sup>  | 0.87     | 2.67      | 3.00(2)   | 103.5     |
| O31  | H31A | O8                | 0.87     | 1.97      | 2.841(2)  | 175.8     |
| O31  | H31B | O32               | 0.87     | 1.93      | 2.791(2)  | 168.5     |
| O35  | H35C | O34               | 0.87     | 2.10      | 2.831(3)  | 141.3     |
| O35  | H35D | O5                | 0.87     | 2.04      | 2.881(4)  | 161.5     |
| O35  | H35D | O6                | 0.87     | 2.46      | 3.143(4)  | 135.7     |
| O32  | H32A | O4                | 0.87     | 1.87      | 2.729(2)  | 172.1     |
| O32  | H32B | O5 <sup>3</sup>   | 0.87     | 2.39      | 3.203(2)  | 154.9     |
| O32  | H32B | O35B <sup>9</sup> | 0.87     | 2.39      | 2.824(11) | 111.6     |
| O33  | H33A | O35B              | 0.87     | 1.82      | 2.650(7)  | 159.5     |
| O33  | H33A | O35               | 0.87     | 1.96      | 2.810(4)  | 163.9     |
| O33  | H33B | O3 <sup>10</sup>  | 0.87     | 1.97      | 2.833(3)  | 175.4     |

----  
<sup>1</sup>1-x,2-y,1-z; <sup>2</sup>1-x,1-y,1-z; <sup>3</sup>-x,2-y,2-z; <sup>4</sup>+x,-1+y,+z; <sup>5</sup>-1+x,+y,+z; <sup>6</sup>1-x,1-y,2-z; <sup>7</sup>1-x,2-y,2-z; <sup>8</sup>1+x,+y,+z; <sup>9</sup>-1+x,1+y,+z;  
<sup>10</sup>1+x,-1+y,+z

**Table S8:** Atomic Occupancies for all atoms that are not fully occupied in **MAB8**.

| Atom | Occupancy | Atom | Occupancy | Atom | Occupancy | Atom | Occupancy |
|------|-----------|------|-----------|------|-----------|------|-----------|
| O21  | 0.504(5)  | H1D  | 0.504(5)  | H4A  | 0.504(5)  | N2B  | 0.496(5)  |
| H21A | 0.504(5)  | C2   | 0.504(5)  | H4B  | 0.504(5)  | C1B  | 0.496(5)  |
| H21B | 0.504(5)  | H2A  | 0.504(5)  | H4C  | 0.504(5)  | H1BC | 0.496(5)  |
| N1   | 0.504(5)  | H2B  | 0.504(5)  | O21B | 0.496(5)  | H1BD | 0.496(5)  |
| H1A  | 0.504(5)  | C3   | 0.504(5)  | H21C | 0.496(5)  | C2B  | 0.496(5)  |
| H1B  | 0.504(5)  | H3A  | 0.504(5)  | H21D | 0.496(5)  | H2BA | 0.496(5)  |
| N2   | 0.504(5)  | H3B  | 0.504(5)  | N1B  | 0.496(5)  | H2BB | 0.496(5)  |
| C1   | 0.504(5)  | H3C  | 0.504(5)  | H1BA | 0.496(5)  | C3B  | 0.496(5)  |
| H1C  | 0.504(5)  | C4   | 0.504(5)  | H1BB | 0.496(5)  | H3BA | 0.496(5)  |

| Atom | Occupancy |
|------|-----------|
| H3BB | 0.496(5)  |
| H3BC | 0.496(5)  |
| C4B  | 0.496(5)  |

| Atom | Occupancy |
|------|-----------|
| H4BA | 0.496(5)  |
| H4BB | 0.496(5)  |
| H4BC | 0.496(5)  |

| Atom | Occupancy |
|------|-----------|
| O35B | 0.294(10) |
| H35A | 0.294(10) |
| H35B | 0.294(10) |

| Atom | Occupancy |
|------|-----------|
| O35  | 0.706(10) |
| H35C | 0.706(10) |
| H35D | 0.706(10) |
